# Supplementary material for: Assessment of Gene Flow to Wild Relatives and Nutritional Composition of Sugarcane in Brazil
Source: Front Bioeng Biotechnol. 2020 Jun 19;8:598. doi: 10.3389/fbioe.2020.00598 (PMC7317034; doi:10.3389/fbioe.2020.00598)
Supplement: Supplementary file 4 [file Data_Sheet_4.FASTA]

>amostra3_S_officinarum_GTGAAA_L001__assembled_to_gi|992330479|ref|NC_029221.1|_consensus_sequence
GAAATACCCAATATCCTGTTGGAACAAGATATTGGGTATTTCCGGCTTTCCTTCCTTCAAAAATTCCTATATGTTTAGGAGAGAAAAACCTTATCCATTAAGAGATGGAACTTCAAGAGCAGCTAGGTCTAGAGGGAAGTTGTGAGCATTACGTTCGTGCATTACCTCCATACCAAGATTAGCACGGTTGATGATATCAGCCCAAGTATTAATAACGCGACCTTGGCTATCAACTACAGATTGGTTGAAATTGAAACCATTTAGGTTGAATGCCATAGTACTAATACCTAAAGCAGTGAACCAGATCCCTACTACAGGCCAAGCAGCCAAGAAGAAGTGTAAAGAACGAGAGTTGTTGAAACTAGCATATTGGAAGATTAATCGACCAAAATAACCGTGAGCAGCCACAATATTATAAGTCTCTTCTTCCTGACCAAATTTGTAACCCTCATTAGCAGACTCATTTTCAGTGGTTTCCCTGATCAAACTAGAGGTTACCAAGGAACCATGCATAGCACTGAATAGGGAACCGCCGAATACACCAGCTACACCTAACATGTGAAATGGATGCATAAGGATGTTGTGCTCTGCCTGGAATACAATCATAAAGTTGAAAGTACCAGATATTCCTAAAGGCATACCATCAGAGAAACTTCCTTGACCAATAGGGTAAATCAAGAAAACAGCAGTAGCAGCTGCAACAGGAGCTGAATATGCAACAGCAATCCAAGGGCGCATACCCAGACGGAAACTAAGTTCCCACTCACGACCCATATAACAAGCTACACCAAGTAAGAAGTGTAGAACAATTAGCTCATAAGGACCGCCATTGTATAACCATTCATCAACAGATGCAGCTTCCCAAATTGGGTAAAAATGCAATCCGATCGCCGCAGAAGTAGGAATAATAGCACCAGAGATAATATTGTTTCCATAAAGTAAAGAACCAGAAACAGGCTCACGAATACCATCAATATCTACTGGAGGAGCAGCGATGAAGGCGATAATAAATACGGAAGTTGCGGTCAATAAGGTAGGGATCATCAAAACACCGAACCATCCAATGTAAAGACGGTTTTCGGTGCTAGTTATCCAGTTGCAGAAGCGACCCCACAGGCTTGTACTTTCGCGTCTCTCTAAAATTGCAGTCATGGTAAGATCTTGGTTTATTCAAATTGCAAGGACTCCCAAGCACACGTATTAACTAGAAAGAAAATAGATAATAGAAGGCTTGTTATTTAACAGTATAACATAGTCTATATACCAATGTCAACCAAGCTAGCCCCAACGATTGGATTTTCGTATAACTTCATTTACCAAATCCAAAAATTTTGGAAATGAAGTTAGTAAAAATTCAAAACTCAGATTGCTCTTTTCTATTTTCCATATGGGTTGCCCGGGACTCGAACCCGGAACTAGTCGGATGGAGTAGATAATTCTTCCTTGTTACAATAGAAAAAAACCCCTCCCCAAATCGTGCTTGCATTTTTCATTGCACACGACTTTCCCTATGTAGAAATAGCCAATTTCTATTCCGAAGAGGAAGTCCACTAATTTTTAGAATTTTTAATTAGTTAAAGTGATTCACCTACTATGGAACATTTCAGAATGGAAAATGTGCAAGTTTTATCTTGATATCGATCTTTTCTAGTTTATTAATTTTGTCTAATGATTAATTAAGAGTAAGAGGATTCACCAGGTCATTGATACGGATAATATCCAAATACCAAATACGCTCACTTTGTGATCCATGGAAAGAAAAGTGAATTGTTTTGGTGAACATCAAAGAAAAAACTTGCTCTTCTTCCGTAAAAAATTCTTCTAAAAATACCGAACCCAATCGTTGCATAAAAGTTCGTACCGTACTTTTATGTTTACGAGCTAAAGTTCTAGCACATGAAAGTCGAAGTATATATTTTAGTCGATACAAAGTCTGTTTTTTCGAAGATCCACTATGATAATGAAAAAGATTTCTACATATCCGACCAAAACGATCAAGAATATCCCAATCTGATAAATCAGTCCAAACGGGTTTACTAATAGGATGCCCCGATCCAGTACAAAATTGAGCTTTTGATAAGGATCCAACGAGGGGAGTTGCAGGGACTGTGGTATTGAATTTTTTCATTCGAGTATCTATTAGAAAAGAATTCTCCAGCATTTGATTCCTTACTAACAAAGTATTTATTGGTACACTTGAAAGGTACCCCAGAAAATCGAAGCAAGAGTTTGTTAATTGGTTTAGACGAATCCTTTGTGGTTGAGTCCAAAAATAGAAAAAATATTGCGAGAAATTGACAAGGTAAGATTTCCATTTCTTCTTCAAAAGAAGAGTGCCTTTTGATGCAAGAATTGCCTTTCCTTGATATCGAACATAATGCATAAGAGGATCCATAAAGAACCATATGGTTTTCCGAAAAAACCCCGGGTACATTACACCAAAATGTTCCATCTTCCCAGAAAAGATGATTCGTTCCAGAAAGGTTCCAGAAGATGTTAATCGTAAGCAAGAAGATTGTTTACGAAGAAACAACAAGAAAAATTCATATTCTGATACATAAGAGTTATATAGGAATCGAAATAGTCTTTGATTTTCTTTTTTCAAAAGAAAAATGGATTTCATTGAAGTAATAAGACTATTCCAATTCGAATAATAGTGGAGAAAGAATCGCAATAAATGCAAAGAGGGAACATCTTGAATCCGGTATTCAAGGAGTTGAACCAGGATTTCTAAATGGATAGGATAGGGTATTTCTATATGTGATAGATAATGTAAATGCAAAAATTTGTCTTCTAAAAAGGGAAATATTGAATGAATAGATTGTAAATTTTGAAACTTTGGTATTTCTTTTTCTTCTGGACAAGATAGTTGCCCTAGCGAGAGTGGGATTTCTACAACAATCCCAAACCCCTCAGATAGAATCTGAGAATAAAACTCAGAATAAAAATAATTGCGGTGATCAAACAATCGATCTTGGTTAGGATAATTAACCGAATTAATCAAAAAATTCTGCTGATACATTCGAATAATTAAACGTTTCACAAGTATTGAACTAAATTTCTTGTTATTACAACCAAAAATTTCCACAGGTTCGGAACCATTTAATCCATAATCATGAGCAAATGCATAAATATATTCCTGAAAGAGAAGTGGGTAGACGAAGTAGTGTTGACGAGATTTCTGTTTTTCTGAATACCCTTCGAATTTTTGCATTTGTATTTCTACTTGAATCAGAGAAAAAAGCATTTCTCGGTTTATCAAATGATGATACATAGTGCAATATGGTCAGAACAAGGTGTTGCATAATACAAACCCAGGAAAGAAAGGGAGTCTAATCCATAGAACTTTTTCCGCTCCTTTTCTATCTAATTAGTTTATGTTTGTTCTAATTACAAAACAAACAAGAACAAATCTTTTATTTTTGCAGGCCAATCGCTCTTTTGACTTTGGAATACAGTCTCTTTATCAATATACTGTTTCTTTTACACATTCAAGTCATAACATCCCTTTTCAATCCATAATCAAGAATAATTAGGATTTCTAAAAAAAAAGTAAAGGGTCCACTCATAGGAAAACCTAACCTTTCCCTGCATTAGGCACTAATCTATTTTTAACGTCTAATTAGATCGGGGAATCCTTCCAATTAACCAATTAAGAAGTTAAGCTCGTTGCTTTTTTTTTATTTTACCAGAATTAGAGCCAGGCTCTATCCATTTATTCACTAGACCCAGAAAATCAGAATTTTTTGATTAAAAAAAAAAAAAAAGAAATTGATTTTATTACGACATGCTATTTTTTCCATTCATTACCTTTGAGGATCAGTCGTGGTCTTCTAGACTCTACCAAGAGTCTGGACGAATTTGTTGCTTCATCCAAATGTGTAAAAGATCATAGCCGCACTTAAAAGCCGAGTACTCTACCATTGAGTTAGCAACCCAGATAAAATAGGATCTCTTAGATACGATCAAAATCTAAAAATCGATGAAATTACACCGGACGCTCCTGTCAAAACATTGAATTAGCAAGACATCAAAAGAAAGATTTTCTAATCCATTAAAAACACTCAAATACCAAAATGAACAGATCCGGTTCAATTTCACTAAGGCTAAGGGTAAAAAAAAAAGCAGCCCCAATCACAATGGCAAAATTGTGATTTTTTTGGCAATTTTTATTTAAAGAAGTAAAATAATCTTGTATGAGAGTACATGCAAGAGGGGCAACCCTATCATTTGAACGAAGTGTAGACAGAAATACCTAATATGGAGTGACAATAAAGAGACCCATCTATCTACAAATTCTATTTGTTCAATAGACCTTTGTCAATGGAAATACAATGTAATTAGATAGAAAAAGGAAATAAAATAGGGACTTTTGTTGGATTGGCACGATATAAATGCAGCAAAAAAAAATAGGACTAAGAAAGAGGCAAATTGTGTCTAAATAATTAAGGGGTACTAAGGACCCTCTCCTACTTTTTTATTCATTTAGTTCTTTTCTTCAATTAACTCAAAGTTCTTTCTTTATCTTTAAAGAATTCTGCCTTCCTTAAAATATCATAAACTGTTCTTGTAGGTTGAGCACCCTTTTCAAGGAAATAGAGAATAGCTGGAACATTTAAACAAGTTTGATTCTTTATCGGATCATAAAAACCTACTTTTCGAAGATCTCTTCCTTCTCTTCGAGATCGAACATCAATTGCAACGATTCGATAGATAGCTTATTGGGATAGATGTAGATAAACAACCCCCCCTAGAAACGTATAGGAGGTTTTCTCCTCATACGGCTCGAGAAAATGATTCGAATTTCTGTCTATAATGCAAATAGATAGAAATTCGATTATGACTTGCATTAATTTCCTTAAAGAAAATCAAAAACCAATTTCATTTATACTCATGACTCAAGTTGGCTAATTTTGACTGACAAACTTCAAAAGAAATTCGAAATTTTTTGAGTCGTCTCTAAACTCTTTTCTTTATCTCATCTCGAACAAATTGACTTTTATTCCTTATTCTGATCTAATTCTATTGTTGAGACGGTTGAAAATCGTGTTTACTTGTTCCGGAATCCTTTATCTTTGATTTGTGAAATCCTTGGGTTTAGACATTACTTCGGGAACTCCTATTCTTTTTTCTTTCAAAAGAGTAGCAACATACCCTTTCTTTTTTCTTATTTCCTTCGATAAAGCATTTCACTCTTCTATAGAAATCAAATATGAACAATTGATTCAGATAGACTTTTAATCAAAAAAGTTTTTCCAATCTTCCAAAATTAGACTTTTTCTTATTTTAACCTTTTGATTTCTATATTAAGGATAGACTGACAAAGTTGGCCTAATTTATTAGTTTTCACTAACCCTAGATTCTTTCCCTTGATCAAAAAGAAATTCTGTCCTCTCGAGCTCCATCGTGTACTATTTACTTTACTTACAAACAACCCAGCGCAAATTCGGTTCGGGACGAATAGAACAGACTATGTCGAGCCAAGAGCATTTTCATTACTATGGAAAATGATGGATAGCAAAATCCACAATCGATCATGTCCTTCAAGTCGCACGTTGCTTTCTACCACATCGTTTTAAACGAAGTTTTACCATAACATTCCTCTAATTTCATTGCAAAATGGTATCGAGAATTGATCCAATATGGATGGAATCATGAATAGTCATTGCTTTTGTATACTAATTCAAACCTGCTATCTATGGAGAAAATTGGATAAAAGAAATAAGTATTTATCGGGGAACACTCTGCAAAGATACAATTTATTTAAACCCATATTCTATCATATGAATGAAACATAGTTCGAAAAAGAGGAATAAAATAGTTTACTTAAGACTTATTTATTTTTATTATTGAATTTCCATTCTCAACAGAGAACTCAAGATGATCAATCCTGAAATGAGAAGGATCGACTCTTTCCCAACAAATAAACTATCAACCTCAAAAAAAGTGGAATTAATTTAATGAATTAATATATTTTTCTGTAACAAAAACAATTAACTATTAAACAAATAAGCTATTAAACAAATAAGCTATGCCAATGAAAAGATTGGTCGTTTTTGGGTAGTTATAAAATTCTCATACTTCTTCGACTCGAATAACAAAAGAAAGAAATTTTTTTTTTTAAGTAAAATTAAGGTCTTTGCTTTTACTTATAGCATTCTTTCTTTTACCTAAAAGAAAGAAAGAACTCAAAATAAAAAATAAGAAAAGTACGATTTTTTTCGAATCCATTCTAACCAACGAACAGTTCTTACCTTAACCTTACCGAAATGGATCATTCTAGATATTTAAAGAATCACAGATCGAGATCGTTTTCGCTTAACCAAAGAAAAGAAGGACGCTTCTTTTTTACTAATAATACAAGAAAACAAATAATACAACAAAAATCTATCTCTATCATAAAGGGATAGGTCTCATTTTCTATACAGTGTTTTACCTCATTAAATTTTTTTTTTTTTTCAATCAATTCGAAAGTGGAGTAGACAGAATATATGAATTTATCTCTAATCCTCACATTCCATTGATTTAGAAATGGATATTTGCAAATCAGATAATACCTAAAATAGAAAAATAGAGTCCCTATCCGTAGAATGGAAACCTTTTTCTTTTTTTTCGCGCCGATCTTGGTCAAAAGTTTTAAGGCCTGTGCTGAAACTAAAAACATCCTACTCTTTAATCTGGCCATGAAACATAGAATTAGAATACTCCCCCTCTTTTTTTTTACTTACTTTAGTTCTTTAGTTTTGGGAAAATAAATAGGGGGGTACTTCTTTTCTTTCATATTGGGTGTCAAATGGATCCTGTAAGAATTCCCACTTCATAGATACGGGGTATAAAGTTTATCAAAAAAGTTCAAATTTCAAAACACATATTCAAAACACATATGAGTAATGAGTAGTAGGGGCATATCCTGAATGTGCCTGATAGACAAAAATTTTTCATGAAAATAAAGATATTAAATTTGACTGGACTTGACACTTTATTTTTTGTTTTCTGAGAAAGAAAAAAATGCTTAGAAATGCATCTAATCTACGAGTTCATAAGAGATAATTATTCTCTTTAATAAACTTTTGTGTCGTGCAGGGCACAATACGATTCTATCTTTCGCTTCATCATAAAAAATCTGGGACGGAAGGATTCGAACCTCCGAGTAACGGGACCAAAACCCGCTGCCTTACCACTTGGCCACGCCCCATGTCATTTCGTTTTATGAGACACTAATAAACACTATTATTTTTATATATTATTCGTCAATCCCACTTCAATTACCTAAAAAATGAGGGATATTTTCTTGCTAGGATTCTAGACATGCAGATAATATAGAATCCAAAAAATGCATTGATCATTACATGGAATTCTATTAAGATATTATATGAAAGTCGAATTTCTTCCATTCTCGTTTGAGAATGCGAATACAAGGAGGTATTTTGTGTTTGGGAAAGTCCGAAGAAAAAAGGATTTGGAATCTACTTTTTCTTTTGCTTTTTCCCTTAGAAAAATAACTCAATCAAAATCCAATTATCTACTCTACAAGAATGAAATGCTTGTTATGCCTAATATACTTAGTTTAACCTGTATCTGTTTTAATTCTGTTCTTTGTCCGACTAGCTTTTTCTTCGCCAAATTACCCGAAGCTTATGCCATTTTCAACCCAATCGTGGATGTTATGCCTGTCATACCTGTACTCTTTTTTCTATTAGCGTTTGTTTGGCAAGCTGCTGTAAGTTTTCGATGAAATCTTTACTATTCTGCCTGCCAAATTGAATGATGTATTCATTCCAAAAAAAAAAATGGATAAGAGCCGAGAAGTCTTATATTATGAACCTTCGATTCTAAAATTCAAATTCTTCTACATTGAATGTATAGCTGCAGCAATAAATTTTGATCAGCCTTTCTACCCCCTGGGCCTACGTTGAACGTACCTTTAGGTACCCACACAATACCTAAACTAATTTTTGATATTGATAAGAGTGCTTATTATAAAGCAATTCTTGCAATTTTTTTAAGAATTGATTTTTGCATTTTTAGGTGTCAAAATAAAGAAAACCCATCCTAGTGGATCCGTGTGGTAAGGAAAAATGGGTAATCTATTCCTTAACAAAAAAAATTTTGGAGATTATGTAATGCTTACTCTCAAACTTTTTGTTTATACAGTAGTGATATTCTTTGTTTCCCTCTTTATCTTTGGATTCTTATCTAATGACCCAGGACGTAATCCTGGGCGTGAGGAGTAAAAATCCAAAATTTTTTGGAATTTTTTCTTATAAATTAAAATTGGATTTATTTCGTACATTTATTTATGAGAAAATCCGGGGGTCAGAATTCCTTACAATTCGAAAGTCCCAAATGATCCGAGGGGGCGGAAAGAGAGGGATTCGAACCCTCGGTACAAAAAAATTGTACAACGGATTAGCAATCCGCCGCTTTAGTCCACTCAGCCATCTCTCCCCGTTCCAAATCGAAAGGTTTTCATGATATGACAGAGGCAAGAAATAACGATTGCAAAAAATCCTTCCTTTTTCTTTCATTTCAAAAGTGCATAAAAATTATATTGCCAATTCCATTTTAATTATATTCTTTTTTCTTAATGTTAATAAAAAAAAGAAGAAAATTCTGGTTTTTTCTTTCCAAAATTCGATATAGGCTGAGAGACAATCAGATCGATTTTCTCTTCAGCGGGCAGTTCCATATAGAATTTGTTAGAATAAAACAAGCGGGTTATAAAAAAACTCTTTTTTTTTATCCACAAAGCAAAAAAGGTTCTTATCAAACCCACAATAAAATTGGAAAGAAAGATAAAGTAAGTAGACCTGACCCCTTGAATGATTCCTCTATCCGCTATTCTGATATATAAATTCGATGTGGATGAAATTGGTGTATAAGCGCATTTTTTTATTTCCTTAGACTTAGATCGCGCAAGGCAAGAATTTTTCGCTATTTACGATTTCATATTCTTGTTACTAGACGTTCTATAGGAATAAGAAGAAATCGCAACTCTTTTCCGTTACACATAATGAATAAAGGGTTTCAAAAGTCAATTTTTCTTTTCAATATCTTTCTTTTTTTTTTCAGAATCCTATTTTTGTTCTTCCACCCATGCAATAGAGAGCGAATGAGAAAAGAGGGGTTTTCCCTTAAAAAATAGGCTTTGAAATAGAAATCATGGAATAATGCTGAATTCAAATGTTTATTTCTTTATTTCTTTTCTATAGTATAAGAAAAATGAATTAAATGAAATTCGTGGATTTAGCACGACCTTGGTTGTGACCCCATAGATAAAAATGGAAAATTTCTATCTTCGAGACGACTGAAAAAGGGCATTGAACGAGAAAGAAATCGTCCACAGATAATCAAACTATCGTATGCCCTGGAAGTAATATGAGGTGCTCGAAAATGGTTGAAGTAATTGAATAGGAGGATCACTATGACTATAGCCGTTGGTAGAGTTACTAAAGAAGAAAACGATCTATTTGATATTATGGACGACTGGTTACGAAGGGACCGTTTCGTTTTTGTAGGATGGTCCGGCTTATTGCTCTTTCCTTGTGCTTATTTCGCTTTAGGGGGTTGGTTTACAGGGACTACTTTTGTAACTTCTTGGTATACCCATGGATTGGCTAGTTCCTATTTGGAAGGTTGCAATTTCTTAACCGCGGCGGTTTCCACACCTGCCAATAGTTTAGCACACTCTTTGTTGCTACTATGGGGACCGGAAGCACAGGGGGATTTTACTCGTTGGTGTCAATTAGGTGGTCTTTGGACTTTTGTCGCTCTCCATGGAGCTTTTGCACTAATAGGTTTCATGCTACGTCAATTTGAACTTGCTCGGTCTGTTCAATTGCGGCCTTATAATGCAATTTCATTCTCTGGTCCAATCGCTGTTTTTGTTTCCGTATTCCTTATTTATCCACTGGGACAATCTGGTTGGTTCTTTGCGCCGAGTTTTGGCGTAGCAGCTATATTTCGGTTCATCCTTTTCTTCCAAGGATTTCATAATTGGACGTTGAACCCATTTCATATGATGGGAGTTGCCGGAGTATTAGGCGCAGCTCTGCTATGCGCTATCCACGGGGCTACCGTAGAAAACACTCTATTCGAAGATGGCGATGGTGCAAATACCTTCCGTGCTTTTAACCCAACTCAAGCTGAAGAAACTTATTCAATGGTCACTGCTAACCGCTTTTGGTCCCAAATCTTTGGTGTTGCTTTTTCCAATAAACGTTGGTTACATTTCTTTATGCTATTTGTACCCGTCACCGGTTTATGGATGAGTGCTATTGGCGTAGTTGGTCTGGCTCTGAACCTACGTGCCTATGACTTCGTTTCCCAGGAAATCCGTGCAGCGGAAGATCCTGAATTTGAGACTTTCTACACCAAAAATATTCTTTTAAATGAGGGTATTCGTGCGTGGATGGCAGCTCAGGATCAGCCTCATGAAAATCTTATATTCCCTGAGGAGGTTCTACCACGTGGAAACGCTCTTTAATGGAACTTTCGTTTTAGCTGGTCGTGACCAAGAAACCACCGGCTTTGCTTGGTGGGCTGGGAATGCCAGACTTATCAATTTGTCCGGTAAACTACTTGGAGCTCATGTAGCCCATGCCGGATTAATCGTATTCTGGGCCGGAGCAATGAACCTATTTGAAGTGGCCCATTTCGTACCAGAAAAGCCCATGTATGAACAAGGGTTGATTTTACTTCCGCACTTAGCTACTCTAGGTTGGGGAGTAGGGCCGGGGGGAGAAGTTCTAGATACTTTTCCTTACTTTGTATCCGGAGTACTTCACTTAATTTCCTCCGCAGTCTTAGGCTTCGGTGGCATTTATCACGCGCTTCTGGGACCCGAGACTCTTGAAGAATCTTTTCCATTCTTTGGTTATGTATGGAAAGATAGAAATAAAATGACTACAATTTTGGGTATTCACTTAATTTTGTTAGGTCTAGGTGCTTTTCTTCTAGTACTCAAGGCTCTTTATTTTGGCGGCGTATATGATACCTGGGCCCCCGGGGGGGGGGATGTAAGAAAAATTACCAATTTGACCCTTAGCCCCGGTGTTATATTTGGTTATTTACTAAAATCCCCTTTTGGGGGAGAAGGATGGATTGTTAGTGTGGATGATTTAGAAGATATAATTGGGGGACATGTATGGTTGGGTTCCATTTGTGTACTTGGCGGAATTTGGCATATCTTAACCAAACCCTTTGCATGGGCTCGCCGTGCATTTGTATGGTCTGGCGAAGCTTACTTGTCTTATAGTTTAGCTGCTTTATCTGTTTTTGGTTTTATCGCTTGTTGTTTTGTCTGGTTCAATAATACGGCTTATCCAAGTGAGTTTTACGGGCCCACTGGACCAGAAGCTTCTCAAGCTCAAGCATTTACTTTTCTAGTTAGAGACCAGCGTCTTGGAGCTAATGTAGGGTCTGCCCAAGGACCGACGGGTTTAGGTAAATATCTAATGCGTTCCCCAACGGGAGAGGTTATTTTTGGAGGGGAAACTATGCGTTTTTGGGATCTTCGTGCTCCGTGGTTAGAACCTCTAAGGGGCCCCAACGGTTTGGACTTGAGTAGGTTGAAAAAAGACATCCAACCTTGGCAAGAACGACGTTCAGCAGAATATATGACCCATGCTCCTTTAGGCTCTTTAAATTCCGTGGGTGGCGTAGCTACCGAGATCAATGCAGTTAATTATGTCTCTCCTAGAAGTTGGTTAGCGACCTCCCATTTTGTTCTAGGATTCTTCTTTTTTGTGGGCCATTTGTGGCATGCAGGAAGAGCCCGAGCTGCTGCAGCAGGCTTTGAAAAGGGAATTGATCGTGATTTGGAACCTGTTCTTTACATGACCCCTCTTAACTAAGATTTTTTATTTATACCTGTTCTAGTTTTTTTCTGTTCTGGCTCGGTTATTCCATCTAGCCGAGCCATTCATGCTTTTTTATGAAAGAATGATATAAGGGGGCTGAACAAAGAAAAACATAGATAGAAAGAAACAAATGTATTCAATATACAAAAGGAGAGAGAGGGATTCGAACCCTCGATAGTTCCTAGAACTATACCGGTTTTCAAGACCGGAGCTATCAACCACTCAGCCATCTCTCCACAGCCCAATCCCTATTTTATTCCTACAAATAGAACATAGCTATATGAAATGATCTACTAACTCATCTCAGATGCAAGTCCACTTTCAATATATCTCTGTATACTGTATACACGGATACAGAATCCGCTATATCCGTTTGTGAAATAAAGGCTAAATCCCCTCCCCTCAACTCCATATCCAAATAAAAACGGTAAGGAAAAAGTTTTAATAAAAAGAAGAATCAACGGATTCATGATTAAACCCCTCCTACTTCTTGTATTTTCGTACAATTTTGATTAAGTGAGGGATCAAATAGAAATATGTAGTCAACTTTATTTGAAGGTAGTTTGGAGGATTATAAATATGACTATTGCTTTCCAATTAGCTGTTTTTGCATTAATTGCGACTTCCTCAGTTTTAGTAATTAGTGTACCCCTTGTATTTGCTTCTCCTGATGGTTGGTCAAATAATAAAAACGTTGTATTTTCCGGTACATCATTATGGATTGGATTAGTCTTTCTGGTAGCTATTCTGAATTCTCTTATTTCTTGAATTTGTTTAGTATTTAGTAACCCGATACAAAATAAATAAAAAGAAAGGCCCTTTTTTCGAAAAAATTCGGATTTTTATACACATTAAAATGCTATTTTCGTTCCGAATTATTACCTATTCTCTTTCATTATTATGAAATTCTATTGCCATTAGAATATTGATTGATAGACAATTAATAAAAAGAAAACTCTAATAGAAAATGAAACGGTCGACCCAGACATAGACGGTCGACCCAGGTGGATATACCCTATAAAATATAGGCCGTAGCAAGCGTAGTTCAATGTAGCGAGCGTAGTTCAGTGGTAAAACATCTCCTTGCCAAGGAGAAGATACGGGTTCGATTCCCGTCGCTCGCCAGCTTAATTTAGTAAGGTGCTATGATAAAAAATTAAGTCTAGTTGACTACTTAACTACTTATATTATAGTTTATATTATAGTAAATTATTTATTTACTAATTATTTATTTCATTTTCATTTAATATAGTAAATTATTATAGTAAATGACTACTTAACTACACTACTTCTATTAAATTACTATTTAATATTAAATGAATATGAAATTAAGTAGTTGTTAGTCTAGTACTGTACCCCTTCCTATCTTATCCTTCCTTTGCACCCGACTCAAAAAAAAGTGCTTCGAGGGCGCAAATTCAACTTTCTAAGAAAGTTCCCTAAACCGGGGATTCGCCGAGACAAACAAGAGACAAACGGTTTTGAAAGGGGGATAGGCTATGCTTTTCTTTCATTTTTTTTTTTCTGCCTGCTGAATAAAAATAAAAAAAAGGGTTGGATATAGCCCTCTATCATATATATAGAAATAGAATAGTCCATTTATACGGACTGCTAAGTGCGGAGACGGGAATCGAACCCGTGACCTCAAGGTTATGAGCCTCGTGAGCTACCAAACTGCTCTACTCCGCTCTGTAGGGCCGAAAACTGGTGGACGAAAGAAAAAGGTTGAATACAAGTCTCTACCATGTATAGACAAACAAATGGAATAGTCTTTTTATACAGAATGGAGCGGGTAGCGGGAATCGAACCCGCATCGTTAGCTTGGAAGGCTAGGGGTTATAGTCGACGTTGGTTGATTATTTTTGACGTCTCTAATTCAAAACCGAACATGAAATTTTGATTTCATTCGGCTCCTTTATGGATATTCTCACCACTTAACATCTATGTCAGCTTTTCTGTCTGAATGGAACCAAAGCTCTCCGCTTTCTAGATGATCCCTATAGAGTAGGAGATAGAAATTCTCCTAAATATCTATCTAATCTACTTACTTCGTTCCCTAATTTCATTCAAGAGATCCTGAGGAAAAGAGTTGGGTTTCCACCGAGCTGAAACAATATAATATACTGATGGTTCTAGTAAACCAAAACCATCGTTTTTTAGCTATTGGGCTTCCATTTCCTACAAAACAAAAGAAGATTTAGTTACGATTGGAAATAAACTTTTTTGTATCTTCATCCATAGATCCTTTACTCATATTTATTCAATCGGAATACTTATCGGAATACTTAATCCAATGCAAAATTTTGCTTCGCGACTACGTACTCCTAATCGAATTTGTATTTTAGATGCAAATTCAATTAGTCTTTGGATACTAATCGCGAGAATGTATATTCTTCCTCAATATGCTATTGAGAGGAAAAGGATTAAACCCTTTATAAGAACTAAAGTTTTCATCGGAATATGAATATAAAAAAACTTAAGGATGCCTTAAGTATATCATTTCAAATTCAGTTATTAATAGAACGAATCACACTTTTACCACTAAACTATACCCGCTACATGTAGATTATGATACCAATGCTACCCTTTGTCAAGGGTAGCCATTCGAGAAGGAGGCTAATTCCACCTTATCGAATCAAAGGAGAAAGTTCATGGCGGTGGGCGGTTGGTACTTCAATCGCAGGCCTTTACTTTAGGATTTAGATAGCCCCTCTCTAGTCTGTAAAATACATCTCTTCTTACCATACCAATAGCGTATGAACCAAATGTATGCATTTCGATTAGGATCTATTCTACGGTTATGACTACAAGGATCATTATTTGTGAGGACGTAAATGTGCCAGACTGTTGTAAGGAATCGTTTAATTATTCCTACAATATATACTAAGAGATATAAAGGCAGTACAGTCCCCATAAATCCCTTTCTTCCTTTTCTTTTTTGTTCAGAATTGAACAAAGAAAAAAGAAATTGGGAAAGATGTTTTCTTCCTCCACGTATCATGAAGTGCGAGCCATAGGGAAAGAGTGAGATGACTTTCACAAATTTATCATAGACTTCGTCTATCGCTTGAGAGAAGCAACAAAGAGTAATAACTTAAAAAGAAAAGCAGATACGAATCGACAGATTTACCTGATGAAAATTTACATCAGAGGACTCTGATGAGGATTCCTCAAACTCTTCATAAAGAGGATCCAGAAAGTCTCTGGTTAGTCGATCCCCTCCATTTCCTAATTTCCTCTCTTCTTTTCCGCTCAATTCTAGTTTATTAGATTCTTGTTTAAAAGAATCAAAGAAGATGAATAGAACTAAGAACACATAAAAAAGAGCATAGAGAACCATTACCAAACGTTCCTCCTAAGAATCATATTGGGTATCTGTCCCCTTCCTTTTAACCCTAGGATCGAAAATCTAGAATCCTCCCTTTTCCTAGTGTTCGGAAACGGAAAACCCTGAACCTGGAGGAGTTAGGTATGTAGGATATGCTTTTTATTTTTTGTTGGGCAGGCAGTAGTATAATTTTTATACTCTGCAGTATAAATTCGACTCCCAACTTTTTTTTAGAATAAAATTGTTGATAAAACTCCAACATAGTTTGTTCCAAATCCACTAGAATCCTTGTAGAATAGTCAAGTACCCCATTTCCAAGGGGTACCTGTTGAAAATCGTTTCAACAAATCCGTCCAAAACTTTTTAAGAAAAATTAAAAAGTTTTGAACTCGAAAGTTTTTCCAAGAGATGCCTGCTAAAAATTGTTTCAATCTCTCACCAAAACAGATAAGAAGTATATCACTGAAAATTACTATCCAGCCATATGGGTATATGAAGAGCGCAAATTCCTTTATACCCCACCCAATTAGAATTAGGGGAAATAAAACATAAATGTAGAAAGTTCTCATCATAAGATCAGCCAATAGAAGAAAAAAGTCCCTAATTCTGCAGAACATTCTGAGCACGTGAAAAGTGAATAGCCTAAAGATAAAAAAAAAGTTTATCATTTTTTTAACAGCAGTTCTTATTGCCCCTTTGGCCTTTTTGGCCCATTGTTGTATCCGATTCAACAATTGATACATATTTGTTCTCCTCTTAAAAAAAAAATGGAACTTCCGAGCTTTGGTTTGGTGAGTCGTACGAGATCGTGTTTACATACCTATGAACTTAGCCTCTTCAAATGTATCCGATATATAATAATTTTTGGGTGTGTCAACTCTCTGTTCATGTATTTTATTATACATGATATGTATATGTATTTATTTATATAATAATAAATACCTATACTTTGTGCAAGTGATAAGAGATAATATGAAAGATTTTCTTATTTTTCTTAATTTTCTCAAGATTTTAAACCTCGCCATAAATAAACTTCGATATCTCGATCTCGATATATAGAAAAGAAAATCTCTACATATCTCTATATATACATATATTATGTACATTAATATATACATATAATATGTACATTATGCAGTAGACCCATAATGGTAAATGAAAGTGGCTAATTATTGAATAAAAAGCCCTTTTAACTCAGTGGTAGAGTAATGCCATGGTAAGGCATAAGTCATCGGTTCAAATCCGATAAAGGGCTTTTCACTTAGTGGTAGAATAATGCCTTGGTAAGACAGAAGTCATCGGTTCGAATCCGATAAAGTACTTTTCTACTAAATTCATTCATTTCTTTTTTGAAAATGTCTACATTTTTTTTTTTTTTGCAATTTTATGACTTAGTTTAGTGCGAGATGCCCACATTTTTGGTCTGAACACTAAACGAAGCACAGAGTTAAAATTGCAAAAAAAAATGAAATTGGACTCTTTTTCCTGTTATAGCAATCAAATCAATACCTGTACTGAACTAATTTAGATTCCTTTTTATTAGTCTATTCTTATTCTATACCCTTTAAACGAATTTCCTTAACCTTAAAAAGCTTAAAAGGTAGGGGATGATCCGTGAATTAACCTAACCATCAACTAAAAAAAATCCTATGAAAGCATAACAGAAAAGTAGTAAAGACTCTTTTCTTTGATCTAGTTCGAAGAGTATATTGACAATTCCAAAAAACTGCTCATACTATCATTATAGTATAATGACGAGTGGTTGTATACGGTGCTATCGTCTAGTGATGCCCCCATCGTCTAGTGGTTCAGGACATCTCTCTTTCAAGGAGGCAGCGGGGATTCGACTTCCCCTGGGGGTAGGGAGTATTATAAAAAGAGGTTAATCATAGATTATCAAAAAGCCTAGAATAAATTCTTCCTGGGTCGATGCCCGAGCGGTTAATGGGGACGGACTGTAAATTCGTTGACGATATGTCTACGCTGGTTCAAATCCAGCTCGGCCCAAAAATTTAGGGCTTCGTGAATATGAACTAAATCCATTATTTTTTATGGAAGAAAAAAAATGTATTATCCATAGAAATAAAGGATAAAGAGAAACGGGGAAATTTATTTCTAATCCATATCTCTCTGATTCTTTATCTTACAAAGAAAAGACAAAGAAAAGAGCCTTTCTTATGGAAAGGCGGATTATCGTTTATTTTTAGGGATAAAAAATCGCAACATACTAGTTATGCCACTCTCACTATACCCGCATAGGATATGCGGGTATGTAGTATATGATTCGTCTATTTCTTAGAGCACGACAGACGGATCGAATCTTCTATTTAAGAATAGGCATGCCATACACCCCGCAGGGATTGTAGTTCAATTGGTCAGAGCACCGCCCTGTCAAGGCGGAAGCTGCGGGTTCGAGCCCCGTCAGTCCCGAACTAGGGTTCAATGAATGGACAAATTCATCTTTCCTTTTTTCATGGAAATTTTTGATGAAAAAAAGGGGGGGGACAGGAGGCAAGATCAAATATCTATGGGGCACCCTTACTTCACTTTTCTTTTTTTGCATTTCTCAGTAAAAAGAGAGCAGTGCAGTATAGAATTTTTTTTCACTACTTCCGGTGGATAAGGAAAGGCATACATATCATACGTGGATTAGTATAATTTAGGATACTACTCTATTTTTATGATTATACCACCCTCATCTTAACTTCCTATTCGACTCTTATGAAATCGAGTACCGGTATTTTACCGGAATCCATACATAAACCGTATTCGTTTATTGTTAGAGAATGAATTTCATCTAATTAGTTACTTTTTGGGGGTTAAACCGCACCCCTTCCATTTTCTAGTTCCAACTTTGTTTGTGTATGTTCAATGAATAATTGGAAAGAATCCACCTCATTCTCACTCCATTTGCCGACTCCTTTTTTTATGGATTTGCTCTCATCTTTAGACCCCAAAAAGCGTATATTGATAGTAACCTAATAAAATAAAAACCAAGCAAACGCTCTTTTTCCTAAATTAAAATATGGGATCCTTTTTATTTAAGATCCTCTTTTCTCCATCTCATTTCTACTTCTACTGCTTATTGGGATGTCTATGTGACCCATAGAAAGTTGGTCATATAATACATACATAATTGTATGTATAACTATAAGAAAAAGGAAGGGAAATTGGATAAGATAAGAAAGATTTTGGGTTATACATATAGAAAAGCAAAAGTAGAAAAGAATGAAAAATAGAATAGAGGGGGTTTCGAATCCAATCAAAAAACCTATTTTGGTCTTAGTATGGATAAGAGATCTTCCTATGTTATATTATTCCACTATCAACCATGAATTGATTTGATAGATCCAATATTCATAATATTGAATTGATTCAGTATTATCAGAATGCAAGTCCTCCCCTTGAATTTACAGGATACCCCTTTTTCCTCTCCATGGGATTACATCCCGAGTTATTGTGAAAAAAAAATAAAGAAGTTATGGAAGTCAATATTCTCGCATTTATTGCTACAGCATTGTTCATTCTAGTTCCTACTGCCTTTTTACTTATTATTTATGTAAAAACAGCCAGTCAAAATGATTAATTGGAATTCCAATTAATCATTGAAGAAATGAAAAAGGGATTAAAGAAAATAAAAAATCCAAGTCTTAAATGAAAGGGTCTGGTTGGAATCATAAAGTGTGGTAGAAAAAACTATATGTAGTTCTTTCTACCACACTTTAGATTCTTTCTATTATATTATCTTGAATCTACATAGAATCGATTAGTAGATTGAAATAGTAGTCTAATTCAACTTCTTTTTTCACTGCATCCACTTAATTTCAATCAAGTCAAAATCAAAAAAATCGAAGATAATTCTTCATTGAAAGAATCCAAGGAGGGGGAGAAAAATAATACGAGAATAGACTAGAATAGACTATAGTAAAAGAAAAAAAGTAAAAGGAAAAAACCTACGAATCTTTCATGCTTAAAAAAGGTGCGAGATGCTTCAATCGAGATCCTTCAAAAAAAAAAAAGAACATAAAAAATTTTCTAAGAATAAGAAAATAGTATAAATGGAAAATGTGCGATATGTTGTGAATAGCTTCGTGTAAGAAAGTCTAATTTTCTTATGTTCTAATTTTCTTATGTATAGAACTTTCTTTTTACTCATAATTTCTATTCTACTAGAAATTATGAGTTACTATAATCGCCCTTTCTATTCTATTATACTGGAATAGAACATAGTAGAATAGAACGACTCTTTCTTACTTTCTTAAAAGAGTTTCTTACAAGAGTGAAACAAAACTAAAGAAAGAAAAAATAAAGTTTGGCAAAATTATTAATGCAAAACGATCAATTAAAGAAAAGAGTTGATACTACAATTCGACTACTCAATCAATTGGTAGTATCCCTAGAGTCCACTCCTCCCCCATACTACTAGCGAAAGAGAAAATGTAAAGACTACCATTAAAGCAGCCCAAGCGAGACTTACTATATCCATGTAAATTATGTCTCCTATTTCTATGAAAGAATTCTTCTACTATTGATCAATAATCATAGTGGAATCAAGGGTACAGAGTCAAAAGGCCATTCTATTCTGCCCTAAGACTATGGATGAATCCGTTAAAGGAATTTACTCCTAACAAATTCTTATATGATTTCTGGTAGAATTGGAGAGCATTAAGTAGAAATATGATACATCGCTCTTTCCCTAAAAAAGAGTAGGGGATGCTCTGAATAGAAGACGCGGGAATAGAGATATTTTTTCTTTCGTTTGTTACCTTTTTTATAAGCAAAGGACGTAAGAATATACCATAAAATTAGGATAAATAAATATTTATTGGATACCTAACTTACCCATGTTTATTTTTATTTTTGACCTAAACCCTACTGATCCTACTGCTGCCCCGCTTTCTATCTTTCTATGAAAGAGTAAGGAGGTCTTATCCACAATCCAAAAATTGATTTTTGATCAGCCTATTCAATCTAATTCTCGACAGAATCAGTAGCCTTTACTTTAGTGTATGTAGGTAGCATAAGATGTACTAAGTGTATGTAGTAAGATGTACGATAAATAAAATGTATGATAATTAGGAAATCTTTCTATTTCTTCGCAAAGTCCCTTCTTCAATCTTAGATTGAAAAAAGACTGCCCCTTAGGGACCTTTGGCTACGAAGATTTCTGACATCTTAGTCTCGTAGTTTTAAATTCCCGAATCGAATCGATTTAAATTAATAAAAGAATAAGGAAACGCTACCTCATCCCTATTGGTAGCCGTTTGGGCCACTGCCCACAAAACAAACCCTAGTTTAAGGGTAGAACTATGGTATGGATTCTCAAAATCCAGTATCGCCAAACCTAGTTACTCTCGTGCCCCAACTTAGGGGGGTACGAATTTGTCGAGTTTGATCAGTACTATAATCCTAAGTATTTTATTGAAATCCTAAGTATTTTATTGATCAGGCGGCACCCAGATTTGAACTGGGGGTAAAGGATTTGCAGTCCCCTGCCTTACCACTTGGCCATGCCGCCAAAAAATCCGATCTAAAATCGAGAAAAGAGCAAGTATTCATCCACATTTTTTTACTAATTACTAAAACCTTTTTTTCTTTTATCTTGAATCTAATTCTACTTACTTTCTTTTTTCGAATCTTTTTCAAAAAATCGATTTCTGCTTTTTTGGATCCAGTTTCGCTTATTCTCCTCGATGGATTCTATCTTAAAACACACATTGCTAACACTAGAAAACTTCCCGCTTCTTTCTATTCTATTGAGATGACAAAGAAGAAAAAGTGGATTTCCAGTCGCAGGCTGCAAAATTCAGAACAAATTAGAACCATTAACTATAATATAATATAATTAATATAATAATATAATTTTATTTATTTTTTTTTTGAATTGCAGTAGTGAACGACTCTTAAATCGGTATTCCCTCCCCATTATTTTGAATGGCATAATAAAATAGAATAAGAATAAATGTTTCCCTAATCTGTATATAGGGAAACTCCAGGTCCGAACAGCATTATTATCTACAGATCCCCCTTATGTACATATCCCTATGGGGAATCGTGCTTTAATTTTTCATTGCATTAAATATCTTGAATAAAAAAAAGAGGGAATTTGCTCTGATATAGATTATAGCCTGGCCTTCTTGGCCCACCTAAGTGCAATTACGATAAAAGAAAGGATATGTAGATAGGTGGATAACTAGATTGGCAAGTATTTAAAAAATAAAGTACTTTATCTTTATTTTAGGATTCTACAACGAAATCCTTTATTTTCTAGCAATTCTACTACTACGAAACAAAAAAGACCCTTCAAATTCTTTTTGAAAAAGAAACTAAGCGTGCTATTCTAAATCGAACTAAAGTCAAACTTTCTAGTGCTTATAAATTATTATGGCTTTATCCCTTTCATAGAAAGGAGATAAAACGAGAAATCTTTGCTATCCAATCTTTTTAGAATATCATAAAGTTTAAGTGGCAGAATTTGTTTCTAGGACTGTTTTATCAATTCATTTTTATTCCATTTCGACCCCTGCTAAATTCGAACTTTCGTCGAAATCGTCTCTATTCATATGTATGAAATACATATATGAAATACGTATGTGGAGTTCCCTAGAATTTCATGTGATTCAGTAAACAGAATATGGATTCCATGATTGCTAGATTGATCCGTAGGGATTGATGAAGAGTGAGCTGATAATGGAATTTTTCTTCTATAAATAGGAAACTTAAGATTCAAATGCTCCGGAATGGAAATGAGGGAATGTCCACAATACCCGGATTTAGTCAGATCCAATTCGAGGGATTTTGTAGATTCATTAATCAAGGCTTGGCGGAAGAACTTGAGAAGTTTCCCACAATTAAAGATCCAGATCACGAAATTGCATTTCAATTATTTGCGAAAGGATATCAATTGCTAGAACCCTCGATAAAAGAAAGGAATGCTGTGTATGAATCACTCACCTATTCTTCCGAATTATATGTATCCGCGAGATTAATTTTTGGTTTCGATGTGCAAAAGCAAACCATTTCTATTGGAAACATTCCTATAATGAATTCCTTAGGAACCTTTATAATAAATGGAATATACCGAATTGTGATCAATCAAATATTGCTAAGTCCTGGTATTTACTACCGCTCGGAATTAGACCATAAGGGAATTTCTATATGCACCGGTACTATAATATCAGATTGGGGAGGAAGGTCGGAATTAGCAATTGATAAAAAAGAAAGGATATGGGCTCGCGTGAGTAGAAAACAAAAGATATCTATTTTAGTTCTATCATCAGCTATGGGTTCGAATCTAAGAGAAATTTTAGATAATGTTTCCTACCCCGAAATTTTCTTGTCTTTCCCGAATGCTAAGGAGAAGAAGAGGATTGAGTCAAAAGAAAAAGCTATTTTGGAGTTTTATCAACAATTTGCTTGTGTAGGTGGGGACCTGGTATTTTCGGAGTCCTTATGCGAGGAATTACAAAAGAAATTTTTTCAACAAAAATGTGAATTAGGAAGAGTTGGTCGACGAAATATGAATCGGAGACTGAATCTTGATATCCCTCAGAACAATACATTCTTGTTACCACGAGATGTATTGGCCGCTACGGATCATTTGATTGGAATGAAATTTGGAACGGGTATACTTGACGATGACGATATGAATCACTTGAAAAATAAACGTATTCGTTCGGTTGCAGATCTGTTACAAGATCAATTCGGACTGGCTCTTGGCCGTTTACAACATGCGGTTCAAAAAACTATCCGTAGAGTATTCATACGTCAATCGAAACCGACTCCACAAACTTTGGTAACTCCAACTTCAACTTCGATTTTATTAATCACTACTTATGAGACCTTTTTTGGCACATACCCCTTAGCTCAAGTTTTTGATCAAACCAATCCATTGACACAAACGGTTCATGGGCGAAAAGTGAGTTGTTTGGGTCCTGGAGGATTGACGGGGAGAACTGCAAGTTTTCGTAGCCGAGATATTCATCCGAGTCACTATGGGCGTATTTGTCCAATTGACACGTCCGAAGGAATCAATGTTGGACTTACCGGATCGTTAGCTATTCATGCGAGAATTGATCACTGGTGGGGATCTATAGAGAGTCCGTTTTATGAAATATCTGAGAAAGCAAAAGAAAAAAAAGAGAGACAGGTAGTTTATTTATCACCAAATAGAGATGAATATTATATGATAGCAGCAGGAAATTCTTTGTCCTTGAATCAGGGTATTCAGGAAGAACAGGTTGTTCCAGCTAGATACCGTCAAGAATTCCTGACTATTGCATGGGAACAGATTCATGTTAGAAGTATTTTTCCTTTCCAATATTTTTCTATTGGAGGTTCTCTCATTCCTTTTATTGAGCATAATGATGCGAATCGGGCTTTAATGAGTTCTAATATGCAGCGCCAAGCAGTTCCACTTTCTCGGTCCGAGAAGTGCATTGTTGGAACTGGATTGGAACGACAAACAGCTCTAGATTCGAGGGTTTCCGTTATAGCCGAACGCGAGGGAAAGATCATTTCTAGTGATAGTCACAAGATCCTTTTATCAAGTAGTGGGAAGACCATAAGTATTCCTTTAGTTGCCCATCGACGCTCTAACAAAAATACTTGTATGCACCAAAAACCTCGGGTTCCGCGGGGTAAATCCATTAAAAAAGGGCAAATTTTAGCGGAGGGAGCAGCTACAGTTGGCGGGGAACTTGCTTTAGGAAAAAACGTTTTAGTAGCTTATATGCCCTGGGAGGGTTACAATTTTGAAGACGCAGTACTAATTAGTGAACGTTTGGTATATGAGGATATTTATACTTCTTTTCACATCCGAAAATATGAAATTCAGACGGATACGACAAGCCAAGGCTCCGCTGAAAAAATCACTAAACAAATACCACATCTAGAAGAACATTTACTCCGCAATTTGGACAGAAATGGAGTTGTGAGGTTGGGATCCTGGGTAGAAACTGGCGATATTTTAGTAGGTAAATTAACGCCTCAGATAGCGAGCGAATCGTCGTATATCGCGGAAGCTGGATTATTACGGGCTATTTTTGGTCTTGAGGTATCCACTTCAAAAGAAACTTCTCTCAAACTACCTATAGGTGGAAGAGGGCGCGTTATCGATGTGAAATGGATCCAGAGGGACCCCTTTGACATAATGGTTCGTGTATATATTTTACAGAAACGTGAAATCAAAGTTGGGGATAAAGTAGCCGGAAGACACGGGAATAAGGGGATCATTTCCAAAATTTTGCCTAGGCAAGATATGCCCTATTTGCAAGATGGAACACCTGTTGATATGGTCTTCAATCCCTTAGGAGTACCCTCACGAATGAATGTGGGACAAATATTTGAAAGCTCGCTCGGATTAGCAGGGGATCTGCTAAAGAAACATTATAGAATAGCACCCTTTGATGAGAGATATGAGCAAGAGGCTTCAAGAAAACTTGTGTTTTCGGAATTATATGAAGCCAGTAAACAAACAAAAAATCCATGGGTATTTGAACCCGAGTACCCGGGAAAAAGCAGAATATTTGATGGAAGAACAGGAGATCCCTTCGAACAGCCTGTTCTAATAGGGAAGTCCTATATCTTAAAATTAATTCATCAAGTTGATGAGAAAATTCATGGACGTTCTACTGGGCCCTACTCACTTGTTACCCAACAACCCGTTAGAGGAAGAGCCAAGCAAGGGGGACAACGAATAGGAGAAATGGAAGTTTGGGCTTTAGAAGGATTTGGTGTTGCTCATATTTTACAAGAGATACTTACTTATAAATCTGATCATCTTATAGCTCGCCAAGAAATACTTAATGCTACGATCTGGGGAAAAAGAGTGCCTAATCACGAGGATCCGCCAGAATCTTTTCGAGTGCTCGTTCGAGAACTACGATCTTTGGCTCTAGAACTGAACCATTTCCTTGTATCTGAGAAGAACTTCCGGGTTAATAGGGAGGATGTTTGATCGGAATAAATATAAATTTTTTTCTTATTTCTATTTTATGATTGACCAATATAAACATAAACAACTTCAAATTGGACTCGTTTCCCCTCAACAAATAAAGGCTTGGGCTAAAAAAATCCTACCTAATGGGGAAGTCGTTGGCGAAGTCACAAGGCCCTCCACTTTTCATTATAAAACCGATAAACCAGAAAAAGATGGATTGTTTTGCGAAAGAATCTTTGGACCCATAAAAAGCGGAATTTGTGCTTGTGGAAACTCTCGAGCGAGCGTAGCTGAAAACGAAGACGAAAGATTTTGCCAAAAATGCGGGGTAGAATTTGTTGATTCTCGGATACGAAGATATCAAATGGGATACATCAAACTAGCATGTCCAGTGACTCATGTGTGGTATTTGAAAGGTCTTCCTAGTTATATTGCGAATCTTTTAGATAAACCCCTTAAGAAATTGGAGGGCCTAGTATATGGTGATTTCTCTTTTGCTAGGCCCAGCGCTAAAAAACCTACTTTCTTACGATTACGGGGTTTATTCGAAGATGAAATTTCATCCTGTAACCACAGTATTTCTCCCTTTTTTTCTACCCCAGGCTTTGCAACATTTCGAAATCGGGAAATTGCAACAGGAGCAGGTGCTATTAGAGAACAATTAGCGGATTTAGATTTGCGAATTATTATAGAGAATTCTTTGGTTGAATGGAAGGAATTAGAAGACGAGGGGTATAGTGGAGATGAATGGGAAGATAGAAAAAGACGAATAAGAAAAGTTTTTTTGATTAGACGCATGCAATTGGCGAAACATTTTATTCAAACAAATGTAGAACCAGAATGGATGGTTTTGTGCTTATTACCGGTTCTTCCTCCCGAATTGAGACCCATTGTTTATAGATCTGGGGATAAAGTAGTGACTTCAGATATTAATGAACTTTATAAGAGAGTTATCCGTCGGAACAACAACCTTGCCTATCTATTAAAAAGAAGTGAATTAGCACCAGCAGATTTAGTAATGTGCCAGGAAAAATTGGTACAAGAAGCCGTGGATACACTTCTTGATAGTGGGTCCCGCGGGCAACCGATGAGGGATGGTCACAATAAAGTATACAAATCACTTTCAGATGTAATTGAGGGTAAAGAGGGGAGGTTTCGCGAGACTCTGCTTGGGAAACGGGTCGATTACTCGGGGCGTTCTGTCATTGTTGTGGGTCCTTCGCTTTCATTACATCAATGTGGATTACCTCTAGAGATAGCAATAAAGCTTTTTCAGCTATTTGTAATTCGCGATTTAATCACGAAACGTGCTACTTCTAATGTCAGGATTGCTAAAAGGAAAATTTGGGAAAAGGAACCCATTGTATGGGAAATACTTCAAGAAGTTATGCGGGGACATCCTGTACTGTTGAACAGAGCACCTACCCTGCATAGATTAGGCATACAGGCTTTCCAACCCACTTTAGTAGAGGGACGTACTATTTGTTTACATCCATTAGTGTGTAAGGGTTTCAATGCGGACTTTGATGGGGATCAAATGGCTGTTCACCTACCTTTATCCTTGGAAGCTCAGGCGGAAGCCCGTTTACTTATGTTTTCTCATATGAATCTCCTGTCTCCCGCTATTGGAGATCCTATTTGCGTGCCAACCCAAGACATGCTTATCGGACTTTATGTATTAACGATTGGAAACCGTCGAGGTATTTGTGCAAATAGATATAATAGTTGCGGAAACTCTCCAAATAAAAAAATAAACTACAATAATAACAATTATTATAAGTATACGAAAGATAAAGAACCCCATTTTTCTAGTTCCTATGATGCACTGGGAGCTTATAGACAGAAACGAATCGGTTTAAACAGTCCCTTGTGGCTCCGATGGAAACTAGATCAACGCATCGTTGGGTCAAGAGAAGTTCCGATTGAAGTTCAATATGAATCTTTTGGGACTTATCATGAGATTTATGCCCACTATCTAGTAGTGGGAAATAGAAAAAAAGAAATCCGTTCTATATACATTCGAACCACTCTTGGTCATATTTCTTTTTATAGAGAAATAGAGGAAGCCGTACAAGGATTTAGTCGGGCCTATTCATACACTATCTAAACAAGGAAGTTAAATTCGGCGATGCCCCTTTCGGGGGGCATTCCGATTTCGCTAGTACCATCTTTTTTGCCGCGCAAATCCAGATTGAGATTGAGGAAAGGGAGTAAATTAAGTTTTCGAATCACTGACTCAGGCCCATTGTCGAATCCTACTCAGCAATTGTCGAATCCTACTCAGCCAAAAAAGGGGGTACTTATGTATGGCAGAACGGGCCAACCTGGTCTTTCATAATAAAGAGATAGACGGAACTGCTATCAAACGGCTTATTAGCAGATTAATAGATCATTTCGGAATGGGATATACATCCCATATACTGGATCAAATAAAGACTCTGGGCTTCCATCAAGCCACTACTACATCGATTTCTTTAGGAATCGAGGATCTTTTAACAATACCCTCTAAAGGATGGTTAGTCCAAGACGCGGAACAACAGAGTTTTCTTTTGGAGAAACACTATTATTATGGAGCTGTACACGCGGTAGAAAAATTACGCCAATCCGTTGAGATATGGTATGCTACAAGTGAATATTTGAAACAAGAAATGAATTCGAATTTTCGAATAACGGATCCTTCTAATCCAGTCTATCTAATGTCTTTTTCAGGAGCCAGAGGAAATGCATCTCAGGTACACCAATTAGTAGGTATGAGAGGGTTAATGGCGGATCCTCAAGGACAAATGATTGATTTACCTATTCAAAGCAATTTACGCGAGGGACTTTCTTTGACAGAATATATAATTTCCTGCTACGGAGCCCGAAAAGGGGTTGTAGATACTGCTGTACGAACAGCGGATGCTGGCTATCTTACACGTAGACTTGTTGAAGTAGTTCAACATATTATTGTGCGTAGAAGAGATTGTGGTACTATCCAAGGTATTTCTGTGAGTCCTCAAAATGGGATGACGGAAAAACTTTTTGTCCAAACACTAATTGGTCGTGTATTAGCAGACGATATATATATTGGTTCACGATGCATTGCTTCTCGAAATCAAGATATTGGAATTGGATTAGTCAATCGATTCATAACTGCCTTTCGAGCACAACCGTTTCGAGCACAACCAATATATATTAGAACCCCCTTTACTTGCCGGAGCACATCTTGGATCTGTCAATTATGTTATGGGCGGAGTCCCACTCATGGGGATCTGGTCGAATTGGGGGAAGCTGTAGGTATTATTGCGGGTCAATCAATTGGGGAGCCGGGGACTCAACTAACATTAAGAACTTTTCATACTGGTGGAGTATTCACAGGGGGTACTGCCGACCTTATACGATCCCCCTCGAATGGAAAAATCCAATTCAATGAGGATTTGGTTCACCCCACACGTACCCGTCATGGGCAGCCTGCTTTTCTATGCTATATAGACTTGCATGTAACTATTCAGAGTCAGGATATTCTACATAGTGTGAATATTCCGTTAAAAAGCTTGATTCTAGTGCAAAATGATCAATATGTAGAATCTGAACAAGTAATTGCGGAGATTCGTGCCGGAATGTCCACTTTGCATTTTAAAGAAAAGGTACAAAAGCATATTTATTCCGAATCAGACGGGGAAATGCACTGGAGTACTGATGTTTACCATGCGCCCGAATATCAATATGGTAATCTTCGTCGATTACCAAAAACAAGCCATTTATGGATATTGTCAGTAAGTATGTGCAGATCCAGTATAGCATCTTTTTCACTGCACAAGGATCAAGATCAAATGAATACTTATTCTTTTTCTGTTGATGGAAGATATATCTTTGACTTCTCAATGGCTAATGATCAAGTAAGCCATAGACTGTTGGATACTTTTGGTAAAAAAGATAGGGAAATTCTTGATTATTTAACGCCAGATCGAATCGTGTCCAACGGTCATTGGAATTGTTTCTATCCTTCTATTCTTCAAGATAATTCGGATTTGTTGGCGAAAAAGCGAAGAAATAGGTTCGTCGTTCCATTACAATATCATCAAGAACAAGAAAAAGAGCGAATATCCTGTTTGGGTATTTCAATGGAAATACCCTTTATGGGTGTTTTACGTAGAAATACTATTTTTGCTTATTTTGACGATCCACGATACAGAAAAGATAAAAGGGGTTCAGGAATTGTTAAATTTAGATATAGGACCCTAGAGGAAGAATATCGGACCCAAGAGGAAGAGTATAGGACTCGAGAGGAAGAATATCGGACCCGAGAGGAAGAGTATAGGACTCGAGAGGAAGACTCAGAAGACGAATATGAGAGCCCAGAGAACAAATATAGGACCCGAGAGGGAGAGGGCGAATATGAAATCCTAGAAGACGAATATAGGACTCTAGAGGACGAATATGAAACCCTAGAAGATGAGTATGGGATCCTAGAGGACGAATATAGGACTCTAGAGAAAGACTCAGAGGAAGAATATGGGAGCCTAGAGAACAAATATAGGACCCGAGAGGGAGAGGGCGAATATGAAATCCTAGAGGAAGACTCAGAAGAAGAATATGGGAGCTCTGAAGATGGCTCAGAGAAGGAATATGGGACTTTAGAAGAAGACTCAGAGGAAGACTCAGAGGAAGACTCAGAAGACGAATATGGGAGCCCGGAGGAAAATTCTATCTTAAAAAAAGAGGGTTTTATTGAGCATCGAGGAACAAAAGAATTTAGTCTAAAATACCAAAAAGAAGTAGATCGGTTTTTTTTCATTCTTCAAGAACTGCATATCTTGCCGAGATCCTCATCCCTAAAGGTACTTGACAATAGTATTATTGGAGTCGATACACAACTCACAAAAAATACAAGAAGTCGACTAGGTGGATTGGTCCGAGTGAAGAGAAAAAAAAGCCATACAGAACTCAAAATCTTTTCCGGAGATATTCATTTTCCTGAAGAGGCGGATAAGATATTAGGTGGCAGTTTGATACCACCAGAAAGAGAAAAAAAAGATTCTAAGGAATCAAAAAAAAGGAAAAATTGGGTTTATGTTCAACGGAAAAAAATTCTCAAAAGCAAGGAAAAGTATTTTGTTTCGGTTCGACCTGCAGTCGCATATGAAATGGACGAAGGGAGAAATTTAGCAACACTTTTCCCGCAGGATCTCCTGCAAGAAGAGGATAATCTCCAACTTCGACTTGTCAATTTTATTTCTCATGAAAATAGCAAGTTAACTCAAAGAATTTATCACACGAATAGTCAATTCGTTCGAACTTGCTTAGTAGTGAATTGGGAACAAGAAGAAAAAGAGGGGGCTCGTGCTTCTCTTGTTGAGGTAAGAACAAACGATCTAATTCGCGATTTCCTAAGAATTGAGTTAGTCAAGTCTACTATTTCGTATACACGAAGAAGGTATGATAGGACAAGTGTAGGACTGATTCCCAATAATAGGTTAGATCGCAACAATACCAATTCCTTTTATTCCAAGGCGAAGATTCAATCACTTAGCCAACATCAAGAAGTTATTGGTACCTTGTTGAATCGAAATAAAGAATATCCATCTTTGATGATTTTGTTGGCATCCAACTGTTCTCGAATTGGTTTATTCAAGAATTCGAAATATCCCAATGCGGTAAAAGAATCGAATCCTAGAATTCCTATTCGAGATATTTTTGGGCTCTTAGGCGTTATTGTACCTAGTATATCGAATTTTTCTTCATCTTACTATTTATTAACGCATAATCAGATCTTGTTAAAAAAATACTTGTTCCTTGACAATTTGAAACAAACCTTCCAAGTACTTCAAGGACTTAAATACTCTTTAATAGACGAAAATAAAAGGATTTCGAATTTTGACAGTAACATCATGTTGGAGCCATTCCATTTGAATTGGCACTTTCTCCATCATGACTCATGGGAAGAGACATTGGCAATAATTCACCTTGGACAATTTATTTGTGAAAATTTATGTCTATTTAAATCACACATAAAAAAATCTGGTCAAATTTTCATTGTTAATATGGACTCCTTTGTTCTAAGAGCAGCTAAGCCTTATTTGGCCACTATAGGAGCAACTGTTCATGGTCATTATGGAAAAATCCTTTACAAAGGAGATAGGTTAGTTACGTTTATATATGAAAAATCGAGATCCAGTGATATAACGCAAGGTCTTCCAAAAGTAGAACAAATCTTCGAAGCGCGTTCAATTGATTCACTATCGCCGAATCTCGAAAGGAGAATTGAGGATTGGAATGAACGTATACCAAGAATTCTTGGGGTTCCCTGGGGATTCTTGATTGGAGCTGAGCTAACCATAGCCCAAAGTCGTATCTCTTTGGTTAATAAGATCCAAAAGGTTTATCGATCCCAAGGGGTACAGATCCATAATAGACATATAGAGATTATTATACGCCAAGTAACATCAAAAGTAAGGGTTTCCGAAGATGGAATGTCTAATGTTTTTTTACCTGGGGAATTAATAGGACTATTGCGAGCGGAACGAGCAGGGCGGGCTTTAGATGAATCGATCTATTATCGGGCAATCTTATTGGGAATAACAAGGGCTTCCCTGAATACCCAAAGTTTCATATCTGAAGCAAGTTTTCAAGAAACTGCTCGAGTTTTAGCAAAAGCTGCCCTACGAGGTCGTATTGATTGGTTGAAAGGCCTGAAAGAAAACGTAGTTCTGGGGGGGATTATACCTGTTGGTACCGGATTCCAAAAATTTGTGCATCGTTCCCCACAAGACAAGAACCTTTATTTCGAAATTCAAAAAAAAAATCTATTCGCGTCGGAAATGAGAGATATTTTGTTTCTCCATACAGAATTAGTTTCTTCTGATTCTGACGTAACAAACAATTTCTATGAAACATCAGAGACCCCGTTTACCCCTATTTATACGATTTAAGTATACATAAAGCAATTTTTTTTACTTTAATTTAAACTATACTTTTGACCTTAGAATGCTAACAGGTCTGATTTTCGATTTTGTATTTGAATTTGAATTGTATTTGAATTGTATTTGAATAAGTAAAAGAAGTCAGTTAATTCATTAAGGCTATGTTTATACCGTGTATCAATGGTCAATTATGAGTAGAAGGTTCCATCGGAACAATTATTATTTATTTCAAGCTATTTCGGCTCTTTCTTAATCTTCAAAAAGAAATTAATTCCGTAATGGTAAGACGAAAAAAGAAAAAATAAAAAGGAAGTGTGGAAAAAATGACAAGAAGATATTGGAACATCAATTTGAAAGAGATGATAGAAGCGGGAGTTCATTTTGGTCATGGTATTAAGAAATGGAATCCCAAAATGGCCCCTTACATCTCGGCAAAGCGTAAAGGTACTCATATTACAAATCTTGCTAGAACAGCTCGTTTTTTATCAGAAGCTTGTGATTTAGTTTTTGATGCAGCAAGTCAGGGAAAAAGCTTCTTAATTGTTGGTACCAAAAAAAGAGCAGCGGATTTAGTAGCATCAGCTGCAATAAGGTCTCGTTGTCATTATGTTAATAAAAAGTGGTTCAGCGGTATGTTAACGAATTGGTCGATTACCAAAACTAGACTTTCTCAATTTAGAGACTTAAGAGCAGAAGAAAAAATGGGAAAATTCCACCATCTCCCAAAAAGAGATGCGGCAATCTTAAAGAGAAAATTATCTACCTTGCAAAGATATCTCGGCGGGATCAAATATATGACGAGGTTGCCTGACATTGTGATCGTCCTTGATCAGCAAAAAGAGTATATAGCTCTTCGGGAATGTGCCATTTTGGGGATTCCTACTATTTCTTTAGTCGATACAAATTGTGACCCAGATCTTGCGAATATATCGATTCCTGCCAACGATGACACTATGACTTCAATTCGATTAATTCTTAACAAATTAGTATTTGCAATTTCTGAGGGCCGTTCTCTCTATATAAGAAATCGTTGATTAAGAAGAATAGTTAATTCTTGAGCAACTGCGTAGATTTATAGGATTAATTACTATTATTTTTTGTTTTGCATAGATAAAAGAAGGGGAATATTGATATATATTAGAGGGTATTGATATATATTATGATCTGATGTGATTTCTTGGTATATTAAATATAAGATTAATACTTCAAGTTGCTGAGTTGAGAAAGAGATGCTTGAATCAAAAGAATTCCTTTTTTGAAGTTCAATTTTTATCAGAGGACAATATGAATATTACACCATGTTCCATTAAAACACTCAAGGGGTTATATGATATATCGGGTGTAGAAGTAGGCCAACACTTCTATTGGCAAATAGGAGGTTTCCAAATTCATGCCCAAGTACTCATCACTTCTTGGGTCGTAATTACTATTTTGCTAGGTTCAGTTATCATAGCTGTTCGGAATCCACAAACCATCCCGACCGATGGTCAGAATTTCTTCGAATATGTTCTTGAGTTTATTCGAGACTTGAGCAAAACTCAGATTGGAGAAGAATATGGTCCCTGGGTTCCCTTTATTGGAACTATGTTCCTTTTTATTTTTGTTTCGAATTGGTCAGGTGCTCTTTTACCTTGGAAAATTATAGAGTTACCCCATGGGGAATTAGCAGCGCCCACGAATGATATAAATACTACTGTTGCTTTAGCTTTACTAACATCAGCGGCATATTTTTATGCAGGTCTTAGCAAAAAAGGATTGAGTTATTTCGAAAAATATATTAAACCAACCCCAATCCTTTTACCTATTAACATCCTAGAAGATTTCACAAAACCATTATCACTTAGTTTTCGACTTTTCGGAAATATATTGGCGGATGAATTAGTCGTTGTTGTTCTTGTTTCTTTAGTCCCCTTAGTAGTCCCTATACCGGTCATGTTTCTTGGATTATTTACAAGCGGTATTCAAGCTCTTATTTTTGCAACGTTAGCCGCAGCCTATATAGGTGAATCCATGGAAGGTCATCATTGAATTAACTAGTTTTTGAAATAGTCTTTTTTTTTTTAGCTTAGCCCAATTCATACATGATTCCGGATAATCCTCTTAGTTGGAAAACTAAATAGTTCGAAAGGCGTATGAATATACAACCTAGAGTTGTAGGAGAGAGAATAGACTATATTATGGAAGAGGTAAAGTATATATGCATTCAGGGGGGCGGAATCAGGTTAGATCTATATCCTTAATGCCTATAAGACAGTCATCTTTTGTGTGGCTTTCTAAGGAATGATTTTAGAATCGGATTCAATAGAAAATGAGAAAATACGCAAACAAAATAGAAGAAACAAATGTATATGGGATTTTTTTTATTCCTAAGTTAGATTCATTATCTAATCCGATATATAGAATTCCCTTCTATATGGAACTGGATTCCATATCAAGTTCTATGCAGCATATTGTTATCAATTGTATATCTTGATTTGATTCCTATTGGATTTGGATTAGTTCGATTTCAATAGGGGTTCTTCCTGTATTTCGTCTTTTATTATGTTAGATGAAGGGGAAAAAATGGGAACTCAAAGATATCAAAGAGTCAAAAAAAAGGATGGAATAAAAGAGTGATTGGTTGAAAAGAAAGAGAAATAGAATAATGAGAATCATATGGATTTACACAAACCTCTAATGATTAGAAACTAAAAACGAGATCTCGAAGTAATTCGAACGATTTCGATTATCATTTATTTGTACTTATTAGTTACTTCTACCCGATAGAGCTTAGAAGTTGGAAGTAATAATTTCTTGGTTGATTGTATCCTTAACCATTTCTTTTTTTTTTGACACGAGGAACTCACCATGAATCCACTAATTGCTGCTGCTTCCGTTATTGCTGCTGGATTGGCCGTAGGGCTTGCTTCTATTGGGCCCGGAGTTGGTCAAGGTACTGCTGCAGGACAAGCTGTAGAAGGTATTGCGAGACAGCCAGAAGCAGAAGGTAAAATAAGAGGTACTTTATTGCTTAGTCTAGCTTTTATGGAAGCTTTAACAATTTATGGACTGGTTGTGGCACTAGCGCTTTTATTTGCGAACCCTTTTGTTTAATCCTAAAAAAGAAAATGAGTCCTTTAGATTAGATACTTTTTTCTTTTTTTAGTACATTGGTATTTGCTTATGTAATTCTAAGTATATCAATACTTTACTCCTATTTATTATATTATTTATTTTTTATATTATTCCGGAAATTTTGTATTTATCGGGACAGACAATACCCTAGGAACCCCAAGAAGGGCTGATTTGAGCATGATCAATTTAGAGGATATGCTCGCCCTCTTCCTTCCCGTCCTTAGTTTAGGACAGTGGAAAGTATTTTTCCTTTTATTTTAGGAATTTTGGGAACATTTCAACAAAGGAGATCTTTCACAGGTCAAACGAGACCTAAGATTTAATCTAAAAGAAATTATTAGATTGAATCTATTTGCATTAAAAAAATTGCATTAAAAAAACCGATCAAAAAAGGACGAGCGAAGTAAGTGATCGAAAAACTTTCTTCTTTGTTCGTCCTATCTATAAGAGGAGAGCATATGAAAAATGTAACCCATTCTTTCGTTTTTTTAGCTCACTGGCCATTCGCTGGGAGTTTCGGGCTTAATACCGATATTTTAGCAACAAATCTAATAAATCTAACTGTAGTGGTTGGTGTATTGATTTTTTTTGGAAAGGGAGTGTGTGCGAGTTGTCTATTTCAAGAATAGATTGGATCTATCCGGCTGCACTTTAGAATATTTTTAGTATTTTTTTTTTGATAAATAAGAAAAGGTGCACGATCTCGACGAATTACTTCTGAATAACTTCAGAAATCATATGGAAGAACCATAGCATTTCGCGATTCATTGGTAAATTTACTTTGATTCTCTATAGACCAATAATGTGAGACCATTAACACGGTTAAAGCTAAACTGCTTGAAGTCCGGGCAAAAAGGGGTACTCTTTCTACAACTACATTAGTATTAGTCTCGAAATGCTTTAAACGGGAAATAGCTAGTGTAGAATTTATCTGATATAGAACACTCATATCGATAAAATAGTTTGAACTATTTACTAGAAGGGCACGCAGTCCTTTTTCCAATGCCAAATGGACGACCTATGTATAAAAAAAAGAGAAATTTTTTGGATTTGAAGAAAAAATAAAAGGAATTCTATCAATTTTTATTTTCCATTTATTTAGTTTGTTTTTCTTAATGAAATTGAAATTATTAACTAACAGAGCAAACACAAATAAAGAAACAACTTTGCTGACCATGATAGATTTTTATCTAGTTGGAAGAGTCCTCTTAATATTCATCTAGTCTTATATAAGTTTGGGTATATAGAAATACAAACAGAAAAGAGAGGATAGAGGATAGGCTCATTACATAAAAAAAAGATATGGAAATAGCCATAATACATAACAAAAAAGAAAAAAAGGAGCGGGAGAGCCAAATGAATCGAAAGATTCATGTTTGGTTCGGGAAGAGATCATAAAAATTGTAAACTTAATAGCAAGATAATCTACTTTCATTAAAAGATTTATTAGATAATCGAAAACAGAGGATCTTAAGTACTATTCGAAATTCGGAAGAATTGCGTAGAGGGACCCTTGAACAACTCGAAAAAGCTCGTATTCGATTACAGAAAGTCGAACTAGAAGCAGATGAGTATCGAATGAATGGATACTCTGAAATAGAACGAGAAAAAGAAAATTTGATTAATGCTACTTCTATTAGTTTGGAACAATTAGAAAAGTCTAAAAACGAAACCCTTTATTTTGAAAAACAAAGGGCGATGAATCAGGTCCGACAACGGGTTTTCCAACAAGCTGTACAAGGAGCTCTAGGAACTCTGAATAGTTGTTTGAATACCGAGTTACATTTCCGTACGATTCGTGCTAATATTGGCATTCTCGGGGCCATAGAATGGAAGAGATAATTAAATTTATTAGGTTTTGAACTTCTACTTTTGTTTAGAATTTAGGCATTATTTTTCCCTTGCTTCCAAAAAAAAATTAAAGAAACACTAATGGCAACCCTTCGAGTCGACGAAATTAATAAAATTCTCCGCGAACGTATTGAACAATATAATAGGAAAGTAGGGATTGAGAATATCGGTCGCGTAGTGCAAGTGGGGGATGGGATTGCTCGTATTATAGGTCTTGGTGAAATAATGTCAGGTGAATTAGTCGAATTTGCAGAAGGGACGAGAGGTATTGCTCTGAATTTGGAATCCAAAAATGTTGGGATTGTATTAATGGGCGATGGGTTGATGATACAAGAGGGAAGTTTTGTAAAAGCAACAGGAAGAATTGCTCAGATACCCGTGAGCGAGGCTTACTTGGGTCGTGTTATAAATGCTCTCGCTAAACCTATTGATGGGAGAGGCGAAATTGTCGCTTCAGAATCTCGCTTAATTGAATCTCCTGCTCCGGGTATAATTTCTAGGCGTTCCGTATATGAACCCCTTCAAACAGGGCTTATTGCTATCGATTCGATGATCCCCATAGGGCGCGGTCAGCGAGAGTTAATTATTGGGGACAGACAGACTGGCAAAACAGCAGTAGCCACAGATACAATTCTCAATCAAAAAGGGCAAGATGTAATATGTGTTTATGTAGCTATCGGTCAAAGAGCATCCTCCGTGGCTCAAGTAGTAACTACTTTCCACGAAGAGGGGGCCATGGAATACACTATTGTAGTAGCTGAAATGGCGGATTCACCCGCTACATTACAATATCTCGCTCCTTATACGGGAGCAGCCCTGGCTGAGTATTTTATGTACCGCGAACGGCATACTTTAATAATTTATGATGATCTCTCCAAACAGGCACAAGCTTATCGCCAAATGTCCCTTCTATTAAGAAGACCTCCCGGCCGCGAAGCTTATCCAGGGGATGTTTTTTATTTGCATTCACGCCTTTTAGAAAGAGCCGCTAAATTAAATTCTCTTTTAGGCGAAGGGAGTATGACCGCTTTACCAATAGTGGAGACTCAATCTGGAGACGTTTCCGCCTATATTCCTACTAATGTAATCTCAATTACAGATGGACAAATATTCTTATCCGCGGATCTATTCAATGCCGGAATTCGACCTGCTATTAATGTGGGTATTTCAGTTTCCAGAGTGGGATCCGCAGCTCAAATTAAAGCCATGAAACAAGTAGCTGGCAAATCAAAATTGGAACTAGCTCAATTCGCAGAATTACAAGCCTTTGCACAATTCGCCTCTGCTCTGGATAAAACAAGTCAGAATCAATTGGCAAGGGGTCGACGATTACGGGAATTGCTTAAACAATCCCAATCAAACCCTCTCCCAGTGGAAGAGCAGGTAGCTACTATTTATACCGGAACGAGAGGATATCTTGATTCGTTAGAAATTGAACAGGTAAAGAAATTTCTGGATGAGTTACGTAAACACCTAAAAGATACTAAACCTCAATTCCAAGAAATTATATCTTCTAGTAAGACATTCACCGAGCAAGCAGAAACCCTTTTGAAGGAAGCTATTCAGGAACAGCTTGAACGGTTTTCCCTTCAGGAACAAACATAAATATAGCATGTCTACTCTTATTAGTATAACTCGTGTTAGTAGAAGAGGAATCGTTGAGAAAGATTTTTCATTTGAATCATGCAAATTTTTTTTTTTAGTTTTTAGTATAGTTATTTAAAGAATAGATAGAAAAAAGATTGCGTCCAATAGGATTTGAACCTATACCAAAGGTTTAGAAGACCTCTGTCCTATCCATTAGACAATGGACGCTTCTCTTTATTATTTTATTCTTTCTTTTTTTTTTTCTTTCTCGGAACAAGAGAAATAATAAAAAGAACAAGAGAAATAATAAAAAACTGTTAGACCGAAACTCTTTTAGGAAAGAAAAACAAATCCATATACCATATACAAATGGATGATACATATATCATAAAGAAGGAATATGGAGCAGGTAGTCAGTATCGAACCCGTAACCCCAAGCTTATGAGCTTTGTGAGCTACCAAACTGCTCTACCTTCTTAGCGGGGAACTGGTGGATAAAAGGGGGTTGGATAGGCCCCTCTACCATATCTATACAAATAGAATAGTCCACTTATACAGAATGGTAAAGAGGGCTCTTCTACGATCATCAATTCGAGAAAACCATACAAATATGAAAGAAAGGGTATTTTATCCTTACCAACTGGATCTTGTTGCACCCGGTAACAAACATGCATAAACCATTTCTCGAAGTATGTGTCCGGATAGCCCAAAGTCTCGATAGTTAGCTCTAGGTCTTCCGGTTAAAAAACAACGTCGATGAAGGCGTGTAGGTGCACTATTACGTGGTAGGGATTGCAATTTTTCTTGCATTTTTGTTTTTTCGCTCAAACTCAAAGGGGAAACTTTGCTTCTTATCTTTTTTTTTGAGGATCGACGAATCAAATGATATTTTTGTTCTAATTTATGCCGCTTTTTCTCCCTCTGAATCAAACTTTTTTTTGCCATAATGTGCCGTTCCTCTTATTACCAAGTATATGGTTCTAATCCTAGATAGAAAAATAAATAGAAAAAATCTAAAAAGGCGGATCCTCCCTCTCCATCAAGAGTAATGAACAGGGTTCTGATACAGTACAAAAAAAAATAACTAAATTAACCAAACTTGCCTGATGTTGAGGCAATCAAGAAAGCTGCATAAGTGAATATATAACCCACGGAAAAGTGGGCTAATCCGACCAATCTTGCTTGCACAATGGAAAGAGCCACGGGCTTATCTCTCCAGCGAATTAAATTAGCCAAAGGTGTGCGTTCATGAGCCCATGCTAAAGTCTCAATTAATTCCTGCCAATATCCACGCCAGGAAATTAAGAACATAAATCCTGTAGCCCAAACAAGATGTCCAAATAAGAACATCCAAGCCCATACTGATAAACTATTCATCCCAAAAGGATTATATCCATTAATAAGTTGTGAAGAGTTTAACCATAGGTAATCTCTTAACCATCCCATCAAATAAGTGGAGGATTCATTAAATTGTGAAACGTTGCCCTGCCATAATGTAATGTGTTTCCAATGCCAATAAAAAGTAACCCATCCAATGGTATTTAACATCCAGAAAACTGCCAAATAAAACGCGTCCCAAGCAGAAATATCACAAGTACCGCCGCGCCCTGGGCCGTCGCAAGGAAAACTATACCCGAAATCCTTTTTATCCGGCATTAATTTGGAACCGCGTGCATCTAAAGCACCCTTTACTAAAATCAATGTAGTTGTATGCAAACCTAGAGCAATAGCATGATGAACCAAGAAATCCCCAGGTCCTATTGTTAAGAAAAGCGAATTACTATTCTCATTAACAGCATTCAACCATCCGGGCAACCATATGTTTCGACCTGCATTGAAAGCGGGGCCATTCGTTGAAGATAAGAGTATATCGAACCCATATGTCGTCTTACCATGAGCAGATTGTATCCATTGGGCAAATATAGGTTCGATCAAGATTTGCTTTTCTGGAGTACCAAAAGCAAGCATAACGTCGTTATGAACATAAAGGCCCAAGGTATGGAATCCTAGGAAGAGGCTAGCCCAACTTAAATGAGATATGATAGCTTCCTTATGGTCTAACATTCTTGCCAATACATTATCTTCATTCTGTTCCGGATTGTAATCCCTAATGAAAAAAATAGCTCCATGAGCAAAAGCCCCTGTCATGATGAACCCTGCAATGTATTGGTGATGAGTATATAAAGCAGCTTGAGTAGTAAAGTCTTGTGCTATGAATGCATAAGCAGGTAAAGAGTACATATGTTGAGCTACTAAGGAAGTAATAACCCCTAAGGAAGCTAGAGCAAGGCCTAATTGAAAATGAATCGAATTATTGATTGTATCATAAAGGCCTTTATGCCCACGTCCTAATCGACCCCCCGGAGGAGTATGTGCTTCTAAAAGATCTTTGATACTGTGCCCAATTCCGAAGTTAGTTCGATACATATGACCGGCAATGAGAAAAATAAATGCAATAGCTAAATGATGATGAGCAATATCGGTCAGCCACAAACTTTGTGTTTGTGGATGGAATCCCCCAAGAAGGGTCAGAATGGCAGTTCCCGCTCCTTGAGTGGTACCAAATAAATGATTACTCGAATCAGGATTTTGGGCATAAAGATTCCACTGACCCGTCAGAAGGGGACCCAACCCCTGGGGATAGGGTAATACATCTAAGAAATTATTCCATCGAACGTACTCCCCCCTGGATCCGGGAATAGCAACATGAACTAAATGTCCTGTCCAAGCCAAAGAACTTACTCCGAAAAGTCCTGACAAATGATGATTCAGACGAGATTCGGCGTTTTTGAACCACGAAAGGCTTGGCTTCCATTTGGGTTGTAGATGTAACCAACCCCCTATTAAGGATAGCGTAGAAAGAAATAATAGAAAAAGAGCTCCAGTATAAAGATCTTCATTGGTGCGCAATCCAATTGTATACCACCACTGATAAACCCCAGAATAAGCGATATTCACTGGACCGGCAGCACCTCCTCGAGTAAAGGCTTCCACGGCGGGTTGCCCAAAATGAGGATCCCAAATGGCATGAGCAATAGGTCTTACGTGTAAAGGATCCTGTATCCATGATTCAAAATTTCCTTGCCAAGCTACATGAAACAGATTTCCGGACGTCCATAGAAAGATTATTGCTAACTGCCCAAAGTGAGAAGCAAAAATGTTCTGATAAAGACGTTCCTCAGTAATATCATCATGACTTTCGAAATCATGTGCGGTAGCAATACCAAACCAAATACGACGAGTAGTGGGGTCCTGAGCTAAGCCTTGGCTAAACCTGGGAAATCTTAATTCCATAATGCCTTTCAAATCCTCCTAGCCACTATCCTACTGCAATAATTCTCGCTAAGAAGAATGCCCATGTTGTGGCAATTCCACCCAGAAGGTAATGGGTTACTCCTACAGCACGTCCTTGTATAATGCTCAAGGCTCTAGGCTGAGTAGCAGGAGCAACTTTTAATTTGTTATGAGCCCAAACGATAGATTCAATGAGTTCTTGCCAATAACCACGGCCGCTGAATAAAAACATTAAACTGAAAGCCCAGACAAAATGAGCGCCTAAGAAAAAAAGACCATATGCAGATAATGAAGAACCATAAGACTGAATTACTTGGGATGCCTGTGCCCACAAGAAATCTCGAAGCCAACCATTAATCGTAATGGAACTCTGCGCAAAGTTTCCCCCTGTGATATGAGTTACTATCCCTTGATCACTTATAGTACCCCAAACATCCGACTGCATTTTCCAACTGAAATGGAAAATGACTACCGAAATAGAATTGTACATCCAGAATAGACCTAAGAAAACATGATCCCAGGCGGATACTTGACATGTTCCCCCTCGCCCAGGTCCGTCGCAAGGGAAGCGAAAGCCAAGATTTGCTTTATCAGGTATCAGACGGGAACTGCGAGCAAATAAAACACCTTTCAAAAGTATTAATACAGTCACATGGATGGTAAATGCGTGAATGTGATGGACTAAAAAATCTGCGGTTCCTAATGGAATAGGTAACAAAGCTACTTTGCCGCCTACAGCTACTAACTCGCCGCCTCCCCACGTTAAGCTGGTACTTGTTGTTGCACCAGGAGCTGTTACGCCAGGCGCGCCAGCATGGATATTTTGTATCCATTGAGCAAAGATGGGTTGTAATTGTATGGCGGTATCCGAAAACATATCTTGGGGACGGCCTAAAGCACTCATGGTATCATTATGAATGTACAAGCCAAAACTGTGAAAACCCAGAAATATACATACCCAGTTAAGGTGGGATATGATTGCATCGCGGTGTCTAAGGACGCGATCTAATAGATCGTTGTATCGAGTAGTTGGATCATAGTCTCTTACCATAAAAATGGCTGCATGTGCAGCAGCACCAACTATTAGAAATCCGCCAATCCACATGTGGTGTGTGAACAAGGAAAGTTGTGTACCATAGTCAGTAGCTAGGTATGGATAGGGGGGCATAGAGTACATATGATGAGCTACAACAATAGTTGTAGAGCCTAGCATAGCTAGGTTAAGAGATAATTGAGCATGCCATGACGTTGTTAGGATTTCATAGAGACCTTTATGGCCTTGTCCTGTAAATGGGCCCTTATGAGCCTCCAAAATATCTTTAAGTCCATGACCAATACCCCAATTGGTCCTATACATATGACCAGCGATCAGGAAAAGAATAGCAATAGCTAAATGATGGTGTGCAATATCGCTCAACCATAGACCACCGGTTATTGGATCTAGTCCTCCGCGAAAACTAAGAAATTCCGCATATTTGGACCAATTCAAGGTGAAAAAGGGGGTTGCTCCTTCGGCAAAACTAGGATAAAGTTGAGCCAAAAGGTCGCGATTCAAGATAAATTCATGAGGAAGTGGTATCTCTTTAGGATCAACCCCAGCGTCGAGAAATTGGTTAATCGGTAAAGATACATGGATTTGGTGTCCCGCCCAAGAAAGAGACCCAAGTCCTAATAACCCCGCTAAGTGGTGATTCAACATGGATTCTACATCTTGGAACCAGGCCAATTTGGGAGCGGCTTTGTGATAATGGAACCAACCGGCAAAAAGCATTAACGATGCAAAAATCAATGCACCAATTGCGGTACAATAGAGTTGTAATTCACTAGTTATTCCGGATGCTCGCCAAATCTGAAAAAAACCAGAGGTTATTTGGATTCCTCGGAAACCCCCGCCTACATCACCATTCAAAATTTCTTGTCCTACTATTGGCCAAACTACCTGAGCACTGGGTCCAATGTGAGTAGGATCGCTTAGCCATGCTTCATAATTGGAAAAACGGGCACCGTGGAAGTACATGCCACTCAACCAAAGAAAGATAATGGAGAGTTGGCCGAAATGAGCACTAAAGACTTTTCGGGAGATCTCCTCCAAATCACCGGTATGACTATCGAAATCGTGAGCATCAGCATGTAGGTTCCAGATCCAAGTGGTAGTGTCGGGGCCCTTAGCTATTGTTCTTGAGAAATGCCCGGGTCTGGCCCATTCCTCAAAAGATGTTTTTACAGGATCCCTATCCACAGCAATTTTAACTTCTGGTTCCGACGGACGAATAATCATTAAGTCCTCCTCTTTCCGGACAAGACATACAAAGAGACCCGCCAACTGTCTTTTTATTGAATCTTTTAAAGATAGATATTATGATTAGTCCTTTTCTTTACTATCTACCGTCCTTCTATTTTTTTTTAGTTATTCACTGGAGCAATTATATATTGAAGTCAATCCGAGGCAAGTGTTCGGATCTATTATGACATAAGGATTAGGTGCCTAACGGACATTGGTTATTCTGGAAAATTATTTCCCGACATAACAAAAAAATCTTTTTTTACGTTTTAATTTAAGAAGCTAGTGTATTTTTTTTCTGAGGGTATAAGCCCCTATCTACATCTACTTTCCTTGAGTGAGCATAATATAGATTTTTTGATTCGATTCCAAATTCCAAGATAACTCATTAGAATTATTAATAAGACCGTCCTGATATATTAGGTAGGAATATTTAGATTGCCGACTTTTATGTACTTTATTACTTCTGTTCCAGAGCCTATCCCTATTGTTTATCCTTATGAAATATGATATAAAATTGAAGGTAGAAGAAAGGGATATAATGAAATTCTTGATTTGATCTTCAACCAAACCACCCTTTTTATGAAAATGGAGAGTGGTCTTATTCAAATTCAAAGCGCTTCGTAATCTTTAACCAGTTCTGTGCTTCAATATAATTTCCTGGAGTAAGCGCTATAGCTTGTTTCCAATACTCAGCAGCTTGATCAAACCAAGCTTCCGCAATTTCCGAATCGCCCTGTAGAATGGCCTGTTCTCCTCGGTCGGAATAGGCAGTTCCTTTCCCTAGAACCGTACTTGAGAGTTTCCTACCTCATACGGCTCAGAAATTCCTATCTTAATTTCCCCTATATTAACTGAATTCGATTTCTCAAAAATCAATCCAATTTCTTCTTGGGTTAAGCAGAAGAAGTTAATTACCTAAGTTTCAAACCCTAATTTTGATCAATAATCAGTTTGATCTTTTCTCCCACCTTCAGAAGAATGAAGCATAGATAGACCTATATCCTTCCCTTCGTTCGAATTTTCTGAAAGGTAACTATCTCAGTTTCGTTTCTTTCATATATGAAATTTCTATAGAATCCTGGAAAAAGACCTTTTTCCATAAGAAAGAAAAAAGAACTTACTATCTTTGGGATCTGATACTACACCGCTGCTTAATCCCTTAGTGGATCGGCTTTATTACATAAGCGGATTCCTAAATTTTGTCCCATATCGTGGTATAATGAAGCAGTTTTTTTTTAGTTGTATCGACCCAGTCGCTCACTAATTGATCTTTACGGTGTTTTCTCTATCAATTTCAGCTTTATCCATAGAATAGTAGTATAGGCTCTACTTTCTTCCTATTTTGATTCTCGTGAAGTGTCCTTCCTTCCTACAGCTGATAGGGTAAAATCGTTGTTTTGACGATCCCTATGTAGAAAGCCCTCTTTTCTAGTATTCACTAGAAAATTTCCTCCTTTCTTTTTTTTCTTCTTTCTATAGTGGAGATAGTCGCACGTAATGACAGATCACGGCCATATTATTAAAAGCTTGCGGTAAGAAGGGGTTTCGTTCTAGCGCCCGGAAATAATATTCCAAAGCCTTTGTATGCTCTCCATTGCTTGTGTGTATAAGGCCTATGTTATATAGTATATAACTTCGATCATAGGGATCAATTTCTAGTCGCGTAGCTTCATAATAATTCTGCAAAGCTTCCGCATAATTTCCTTCGGATTGAGCCAACATCCGTTACGGTCGTTCATTCTATTTAAAAAATCTCCGTTCCAAAACCGTACATGAGGTTTTCATCTCATACGGCTTCTCCCTTCTATACTCTCATACGGCTTCTCCCTTCTATACATAGTACTAAGCGAAAAATCTATAGAATAAAAATAGAATTAGTCCCATCTCATTATGGACCGAAGGGGGCTGGTATTTTTCCAAGAAATCTCTAGCCAACCTTCCCCCAAGAGGTTTTTCTTAACACCAATGAATTATATTAATGCTAGAGGAAAACGATAGCTCCAAGAATTTCTTTGTTCTCAACGCCTCCTATTTAGAGGAATTAGCCACTTCAACGACCTTTGATGGTTATAAGGGTATCCAAAGTACAAACCTGATGGTTGTTTGTTATCCCAACCATTCTTCCCAACCCTGATACCAATCAGGAAAGGGCTAATTTCTAACAAAGTTTTTCTCTTGTTGATTCCTATTTCGTGGTGTAGTGCTTTTCTCCCCTATGCTGCCTATTGGTACTAGTAGAGTCGGATTGGCCTGTAATACAGAACCTATCCTGTAGGTGTAACCTTTCGCTCAATACTCAAATCTACAATTGAAGCATCTGAGGCCACATCAATCGAGGATACACGACAGAAGGAATTGTTAGTTCACCTCACCTTCCCCAAGCGCGGGTTTCCTTTACTAATTTTGTTCTCTCTATGCGAACCCTCTCTCTTTCTCGTAAGAATGAGATATAGGTAGGGCTAAAAAAAAAGAGTCAAATCGCACCATCTCTATAATAAGTAAATGCCCTTTTTTCCCCGGAGGTTGTCGGAATTATTTGCAATAAAATATTGGCTACAATCGAGGAGGTCTTATCAATGAAATTTCCATTTATACGGGATCTAGGCATAATTCCCAACCCATTCTATATAGAATTCTTTTCATTCTATCACAAAATAACATAAAAACAAAACATTCGATTCTTATAAATCGACCCATATGCTCTAAATGGATAAGAGAGGTATGGATTTTCCGCTCAGCTCAAATTGTCTCCTTTTCCTTCTGTTTGGACAAGAAGAGATATGAAATATTTGACTAAGACTGGATTTCATTCCACTTTCCTATTTCTCAACAACAACTTCTCTCATCAGCTATTTCGCGTTTTCAAAGTAATTAATTGCCCCATACCCCTTTTATATTTAGATTGTATGGCGTAATGTACCTTATGCAAATAGAATTCTAGGGTTCCTTTATTTTCTTATGGAATAAGAAGAATTCTTCCATTCTCTTTTTATTTTTGTTTTCCCCAAAGAAAAACTTTTCGAGGGAGCGGAATTCCTAGTAAAAAAATACAGGATCCTTCCACTTAGATGAAAAGGAATTTTTCCATCCAATCCAATAGAGCCATGGAATTCCCGAGCCGTTGTGGCTGACCTGTACTGCAGGAATACGAAAACTCGCTATTCACTCAGTTTATTTTCCATAATAAGATTATGTAGGAGAGATGGCCGAGCGGTTCAAGGCGTAGCATTGGAACTGCTATGTAGACTTTTGTTTACCGAGGGTTCGAATCCCTCTCTTTCCGTTTCTCTTAATTCATCAATGTTAGCGATCACAATGTATCAAATTAAATAACAATTTATTCCAACAATAATACCTTTAATTAATAGAAATTCTCTATAGCAAATTACTGTGGTATGTAAAATACACATCGAGGAAATAACAAAAAAGAAAAAAGGATCCTAGGGTTAATCTATTTCTGCTAGGTGAACGGGAAAATACGAATTAAGAGCCTTAGGTCGATTTAGTTCGGGGAAAGGGGAAGGGGAAAAAAATTCTATGAACCTTTCCTTTTTTCGTTAAGTTCAAGTCTGGCGAGAATAATATTCTACAACTAACAACTCATTTATTTTGAGACCGACCCACTTCCTATCTAGAATTTTTTTTACTAGTCCTTTATATTGCAATGTGTCAACCGTCAAATGCTTTGGTAATTTGCCCGGATCGGATGAAGCAATATAATTTTGAACCAAACGTTTTGATCGTTGGTTATCCTTCGTAGTAATAATATCTCGGGGTTTGCAACGAAAGCTTGGTATATCAACTATACGACCATTAACTAAAATATGTCTATGGTTAACTAATTGTCGGGCCCCAGGAATGGTTGAAGCCATACCCAATCGAAAAAGGATATTATCCAAACGCATTTCAAGTAATTGTAGTAAAACCTGACCTGTGGATCTTTTTGCTTTTCCAGCGATATGTACATATCTAAGTAATTGTCGTTCTGTCAGACCATAATGAAAACGCAATTTCTGTTTTTCTTGAAGACGAATACGATATTGCTCTTTTTTCCCAGAATGGAATTTCTTTTTCTGATTACTTCCGGATTTAGGCGTTTTTCTAGTGAGTCCTGGTAAAGCTCCCAGACGGCGTATTTTTTTTAAACGAGGCCCTCGATAACGGGACATGAAGACTCCTTTTTTATTTTATTGAAATTTCATTTTACACAATAAATTTCGTTCTATTTACATTACAGAATACAGCGAAATTCAAACAGAATTAAACTAAAGGATAAACAGAGTAAAATCTACTAAAGTAACACAAAAAATGGAGTAACACAAAAAATGGAATTTCATCAACATCTGGATTTTTTGTATATATATTATTTATTTTAATGCTTTGTATCTAGCAAAATTGTAAGGTAAAACGACATAATAGACCCTGGATTCCCCATTTAATTCGGAGAAAAAGAGAAATTCTTGTTCATGGAACATCGATAGAAAAAAAAGCCGACTATCGGATTTGAACCGATGACCCTCGCATTACAAATGCGATGCTCTAACCTCTGAGCTAAGTGGGCTTACATAACAGAAATAGTGTAACAAATAAAAATATATATAGGGAATCTGTAAAATGTCAGATCTTAATTATTAATCTTAGTTATTAACTAGTTCTAAATTGGAAGTTCCACTTAGAATAGAAAAAAAAATACTAGAATTTCATAAAGATAAAGTTAGCTTGATATGCTTAACTAAATGATATTCTTAAATAGGATTATAGAATTTATTGAACTTTCTTTTTATTTCTCTAATTCGCAAATGGATTTTTCTAATAGAATCTATTCCAAATTCTATATTGAATTTGATTTCAGATATTTTCAATTTGATATGGCTCGGACGAATAATCTAATACATAGAAAAGAAGAATATATATGAATAATATAATAAAGAGAAAATGCCAATCTCTTGGTATTTTCATTTGATCATTATATACATTTTTGAGATATTTTGTTTTTTTTATTTGTTAATAATTTAAGGATAAATAGTTCACTAAGGAGAAGATAGAATCATAGCAAATGAAATTTCTAATTCAGCTTAGAAAAAAAGAATGAATATCAAGCGTTATAGTATGATTTTGAATACTCTAAAAAATGAAGGAGGGAGGCGGGAGAGAGAAAAACTTTTGGATATATTCATTCCGATTGAATTGCAAATATATCAACGATAAAATCAATTCAATTCTGAATTGCAATAAGCGAGCGGGGTGTCTCAAATAGAGATGAGTTGCTAGACTACGTCGAATAATGAATTAAATGATTCAAAAAAACTAAAAGATGGATTAAATTATACAAGGAATCCTGGTTTCAAAGAAAAGTAAAATGGGGATATGGCGAAATCGGTAGACGCTACGGACTTGATTGTATTGAGCCTTGGTATGGAAACCTGCTAAGTGGTAACTTCCAAATTCAGAGAAACCCTGGAATGAAAAATGGGCAATCCTGAGCCAAATCCCCTTTTTTGAAAAAACAAGTGGTTCTCAAACTAGAACCCAAAGGAAAAGGATAGGTGCAGAGACTCAATGGAAGCTGTTCTAACGAATCGAAGTAATAACGATTAATCACAGAACCCATATTATAATATAGGTTCTTTATTTTATTTTTAGAATGAAATTAGGAATGATTATGAAATAGAAAATTCATAATTTTTTTAGAATTATTGTGAATCTATTCCAATCGAATATTGAGTAATCAAATCCTTCAATTCATTGTTTTCGAGATCTTTTAAAAAGTGGATTAATCGGACGAGGATAAAGAGAGAGTCCCATTCTACATGTCAATACTGACAACAATGAAATTTCTAGTAAAAGGAAAATCCGTCGACTTTATAAGTCGTGAGGGTTCAAGTCCCTCTATCCCCAAACCCTCTTTTATTCCCTAACCATAGTTGTTATCCTTTTTTTCTTTTATCAATGGGTTTAAGATTCACTAGCTTTCTCATTCTACTCTTTCACAAAGGAGTGCGACAAGAACTCAATGAATCTTATGCTATTCATTAAATAGATGATTTCTTTTTTATTTCTTTTTTTTATTTATTAGAGTAGAGTATCGGCAAGGAATCTCGATTATTAATTCGATTTTTTTAAGTATTATTAAGTAAGCCATCCACAATGCATAGGACTACCCCTCCCCATTTCCTAATTTTGAATGGAATACTTTATTGATTTTTTAGTCCCTTTAATTGACATAGATGCAAATACTTTACTAAGATGATGCACAAGAAAGGGTCAGGATAGCTCAGTTGGTAGAGCAGAGGACTGAAAATCCTCGTGTCACCAGTTCAAATCTGGTTCCTGGCACAGAAAAAAAGGATCTACCGAATAGATATTGATACAAATATTTTGAGATGGATTGGGGTAAATATTCATTAAAAATCTACTTAGTCTAGAGTAAGTAGATAAATCTCTAAACACTTCTTTTTCTTTTAAAAATAAAAAAGGGTTCAAATCTCTGGTTCTTTTCTTTATGGTATAGAAAGAGGTGAGATTAGGTGCCCTTTTCTTCATTTTGCATTTCTTATTAATTTTGTATGCCGCTATTCCGAAGAATATTTTTTTTATTCTTGCTTATCCTACTTTCCTAGTTGTTCTAAGTAATATGCGCGGTACAAAGTTCGTGGTAGGAACTTCTTTGAGTCATTGTATTTTTCTGTTCATACGAAGGAAACAAATATGTGATTTTCCAAATTGGAAAATCGAAATGAAGCCCTTTTTGTTCAGTCTATCTGGACCTTTTTGTATAATAGGAATTAATTAGAATATTATATTCTAAGTATTTCGTTTCGTCTAGGAACAGAACCTCCAAATATTCCTTGACTTGAATAAAATCTGGAATTGTGTTGTATAAGTGAACATGAATTTATTATCACTCAATGAGCATCTTGTATTTCATAGAAATTGGGGGTTATATAGTCCTTACGTAAGGGCCAGCCTATCCAACTTTCAGGCATTAAGATACGTTTAAGACGTGGATGATTATCATAAGAAATTCCCACCATATCATAAGATTCGCGTTCTTGAAAATCGGCACTTCTCCAAACCCAGAAAACAGACGGGATTCTAGGATTATCCTTTTGGGCAAAGACTTTTATGCATACCTCTTCTGGGTTATCTATACCATACTGTATTCTCGTAAGATGATACACGCTAGCTAAAGATCCACCGGGTGCTACGTCATAAGCACATTGGGAACGTAAATAATTGTAACCATATACATATAAAATGACAGCAATGGAATCCCAATCCCCCGCTTTTATTTGTAAAGTCTCGACTCCTCGATGATCGAAGCCCAAAGACCTATGAACCACGTCATGTTTAACTAGCCAATTAGATAACCAACCCTGCTGCATTGTCTTGATCTCTCCCCCTTTGTATAAATATTTCACATTTCAAATGCAAGTTTGAAAGATTGCACTGCTCTTTCTTTTTCTGCACAAAAGAACCCCTCCTAATTCACTAATTTGTAGGAAGATACTGAACTTTTGGATTTGAAAAAAGTTTCAGAAGATATATCTAAAGTAGATGGTGATTGATAGAGCAATTCTTGTTCGTAAGTTCCAGTGTGAGTACTGCGCCGAACATAAAGTTTGTGACGGGTAGTAAAAGATCTATTTTTCTTTTGACTTTGACATAGAGTTCGATCCTCAATTATTTCTCGCGCTATCTTCTTACGAAGTTTTGTTAGGGCATCTATAACAGCCTCTGGTTTAGGCGGGCAACCCGGCAGGTAGACGTCCACAGGAATTAACTTATCAACTCCTCGAACAGTACTATAGGAATCTGTACTGAACATGCCCCCTGTAATAGTACAGGCTCCCATAGCAATGACGTATTTCGGTTCAGGCATTTGCTCATATAATCGCACTAAAGATGGAGCCATTTTCATTGTTACCGTACCAGCTGTTAAAATTAGGTCCGCTTGTCTAGGACTTGATCTTGGTACCAATCCATAACGATCAAAGTCGAATCGTGAGCCTATTAATGAAGCAAATTCAATGAAACAACAACTGGTACCATATAAAAGGGGCCATAAACTTGAGAGTCTTGACCAATTCGAAAGATCGTTTGGTGTAGTTGAAATAACGGAATTAGAACTTGTTTGGTCGAGTAACGGAAACTCAATCAAACTCATAATTGTCTCAATGGAATCTTTTCCTTCTTTTTTTTTTTTTTCTGAATATTCAGTTAAGACCATTCCAAGGCTCCTTTTCGCCATGCATAAACTAAACCAACAACTAGGATAAGCACAAAAATGAAAGCTTCGATAAAAACGGATACACCCAATACGTCGAAACTCATTGCCCAAGGGTAGAGAAAGACTGTTTCCACATCAAAAACAACAAAAACTAGCGCAAACATGTAATAGCGTATTCGGAATTGTAACCAAGCCCCCCCCATGGGTTCTATACCCGATTCATAACTAGAAAGCTTCTCTGGTCCTTCACTAACCGGGGCTAAAAGTCCTGAAATCCAAAATACCAAAATAGGAATAAGGCTTGCTATTATTAGAAATGTCCAAAAAATATCATATTCGTGAAGCAGAAACATAAATGTACTCCCATTAATGTGGAATAGGCGGAACTGAATTAGTCAATTCAAGTTGACATTGTCAATTTATCCAGAACTTCTCTCTTTTCCTCGGTGAAACAAGAATCTGTTTTGCTCAAACCAAAGGCAAGGAGCGCTTACTTTAGCCTTTGTTTCTTTTGTGATATGTCTTCCTTAAGGATTCATCCAATGTAATCCCCACTTGCCTTCTTTTTGATTTCCCTTCTATTTAGATATGATATAGACCTAATTCTTATACAAAGAAAACTCTTTCGCTTCACTTTGTCTCACTTTCTCTAGAATCTCTAGAAAAAAGAATAGCTCTACCCTTTAGTTAATGATAGTCAGAGACTATTAAATAAAAAAGAAAATACTTACTACTAATTAGATTAGAACCTAATTAAAATCGGATGATTAATATATACATCCTAATGAGGAGTAATACTAAAAAAAAAGAATTTCAGAATTCTGAAACAGAATATCCTGTTTTATTATTTACTCTTTCTTTTTTTCTTTCGATTTTTTCTATTTTATTTAAAGTGGATCGATTTAGATAATGTATATAATGTATATTTAGATAATGTATATGATAGTAATATACTTCAAACAAAATAGGAATTCGCAAAATGGAGAAAATCGTTGCAGTCATTATAGGAAAGTATAGGGAGACTTAGAGCATATCCTATTTGAAGGAGGATGAAATTCAAATCAGGTAAGCGATCCTTCCTTCTATTGATTTGATCAAAATTCTTTTTTCTTTTCCTGTCTCTCTGATTTTCGATGAATGAGCCTATGGTAATGTTTTTATCTCTATTCTATGGCGCAATCGACCGTCGAGTCTATAAACAAGTACTAAATAAGGAAAAGAAAACTATACTAAAGGAAACATAAGATATCCATCCTAAAATGGAAAAAAAGACGTATATATTAGGGCTATACGGATTCGAACCGTAGACCTTCTCGGTAAAACAGATCAAACGGATTATTATCGAAATGATTCGAACTGTTTCAAAGACCCAACATGCATTTTTCTGCATTGGGCTCTTTCATCAACTGATGTAAAGATCAGTTAATTCGCCATAGTTTTTCTTTAGGGAAAGATAATAAGATGGCTCCCTGTGCTCTGATTTATTATTTGTCTTATGATCTATCTAGGAACAATACCAAAGTGTTTCAAAGGAGGATTACCTTGACTTAGGTCTGCCTCCGGCCTAAATTAAATCAACCTAAGTGAAATGGAGTCTCTATCGTTCCGCTGCAAGAGTTTACTATGAGACTTCATACACCTTAAAGTTCATAGAACGAAAAGAAGTTTTTTGGAGGCCCTTATCCTCATTACGCCTAGCATTGAGTGGGCTGGATATTTACCTTATCAACTAGCAAATCAATAGGGGTTCTATTTGAGTAAGTACCTGAATTGGCACCTGAATCGGACTGAACCGGCTGTTTGTCATTGTCAGGCTACTGTTCTTCTATTCTTTCGAATCCATGAAGTAAGACATTGATTTTGCAACAAGGTCAATTATGTTCATTGCATAATAAGTTCCCTTGAAAAGCATTGGCGCACGTGTAAACGAGTTGCTCTACCGAACTGAGCTATAGCCCTTGTCAGAGATATCTTAACATATAGATAATTTCTTGTCAAGATGAATATTCTCTAATGCCAGAGGATATCCCTTTCATCCGTTTACTATATAACATAACCATACCAATAACGGAATAACATAACATAAACATACCAATAATGGAGCGGTATTGCTTATAAAAAGGATTCAATCTATAATCGATCGAAGTAATGGGGCTTCTTTTGTGGTGATAAATTGCCTACTTAACTCAGTGGTTAGAGTATTGCTTTCATACGGCGGGAGTCATTGGTTCAAATCCAATAGTAGGTAGGTAGGTAGAAAAATTACTAGATAGCATTGGACTTACTTCGCTTCGCTATCTAATAACTTTTTCTACCCTTCTTTCCTTTTTCTTTGTATCAACGAAACCTTTGGATTGTCTTCAATTGGATGGGGGAATCCAATTGACAGCCTCGACTCGTATCCTAGCTCGTCTGAGAGCTAGCTTCGCTTCAACCAATTCTTTCGTACCCTCAGCTTTACTCAAGTTAGCTTCGGCTATTTCAAGTGCCTGTTGAGCTTCTTCTGGATCAATGTCACTACCCAGTTCTGCATCATTTCCTAAAATGATGATCTCATTATTAACTATTCTCGCAAAACCACTCCACAGAACCGCCGTTAACCATTGGTCGTTGAGGAGGCGTATTCTCAAAGGACCCATATCTACAGCTGTGTTAATGGGGGCGTGGTTTGGTAATACACCAATTTGGCCACTATTAGTAGATAAAATGATTTCTTTCACTTCACAATCCCAAATAATTCGTTTAGGAGTCAGTACATAAAGATTTAATTTCATTTCTTCAATTTGCTCTCCTCTTCTAAGTTTATAGCTTTCGTGCTAGCTTCATCGATGTTCCCCACTAAATAAAAAGCCTGTTCGGGTAGGCCGTCTAATTCTCCGGAAAGGATTAGTTGAAATCCCCTAATTGTTTCTGCAAGACCAACATACTTTCCTGGAGAACCAGTAAAAACTTCTGCCACAAAGAACGGTTGTGATAAGAACCGCTCGATTTTTCGTGCTCTTGCTACAGTTAAACGATCCTCCTCCGATAATTCATCCAATCCAAGAATTGCGATAATGTCCTGAAGTTCTTTGTAACGTTGTAAAGTTTCCTTAACTCTTTGCGCAGTTTCATAATGTTCGTTGCCAACGATCCGAGGCTGTAACATAGTTGAGGTTGAATCTAAAGGATCTACTGCGGGATAAATACCCTTGGAAGCTAATCCTCTGGAAAGTACGGTAGTAGCGTCCAAATGTGCAAATGTTGTGGCAGGAGCAGGGTCGGTCAAATCGTCTGCAGGTACATAAACTGCTTGGATCGAAGTTATAGATCCCTTTTTGGTAGAGGTAATTCTTTCTTGCAAAGAACCCATTTCTGTACTAAGGGTAGGTTGATAACCCACTGCGGAGGGCATTCTGCCTAATAAGGCGGATACTTCCGATCCTGCTTGAACAAAACGAAAGATATTATCGATGAATAAAAGCACGTCTTGCTTATTAACATCTCGGAAATATTCTGCCATAGTTAGGGCAGTTAAACCAACTCTCATACGAGCTCCCGGCGGTTCATTCATTTGGCCATAGACTAGAGCTACCTTTGATTCCTCAATATTTTTTTCATTAATTACTCCGGATTCCTTCATTTCCATATAAAGATCATTTCCTTCACGAGTCCGTTCCCCTACTCCGCCAAATACGGATACGCCTCCATGAGCTTTAGCAATGTTATTGATTAATTCCATGATGAGTACTGTTTTACCTACTCCTGCCCCCCCAAACAGTCCGATTTTTCCTCCACGTCGATAGGGAGCTAAAAGATCGACCACCTTAATACCTGTTTCAAAGATAGATAATTTCGTATCTAACTCGATAAAGGCAGGCGCAGATCTATGAATAGGGAATGTTGCACTAGTATCCACAGGACCCAAATTGTCAATAGGCTCCCCAAGAACGTTAAAAATTCGTCCGAGAGTAGCTCCACCGACTGGAACACTGAGAGGAGTTCCCGTGTCAATCACTTCCATTCCTCTCATCAACCCGTCTGTAGCACTCATAGCCACAGCTCTAACTCGATTATTTCCTAATAATTGTTGTACCTCACAAGTCACATTAATTTGCTTATCGGCAGTGTCTCGACTCTTGACTATCAAAGCATTATAAATATTAGGCAACTTGCCCGGGGGAAAAGTGATATCCAGCACGGGTCCAATAATTTGATCAATACGCCCTACGCTTTTTTCTTCAATTGTGGAAACCCCGGGACGCGAAGTAGTAGGATTGGTTCTCATAATTATCACATAATTTTCAAAAAAAAAGGAATTTGTCGAAATTTTTTTTTTCTTGTTGAATAATGCCAAATCAAAAAAAATATCCAAAAATCCAAAAGTCAAAAGGAAATGAATTAGTTAATTCAATAAAAAAGAAAAGGGGACTCGCACTTGATTTCGTTGCCCAAGCGAATCCCATTCAATTGTTTACTTATGGAATGAGTCCGTTGGAAAGTTCAATCAATTTTTTTTCATATAAATTTCGCCTTTTGTGAAGGATCTGTGCCTACTCTACTTTCCTATCTAGGACTTCGATATACAAAATATATACTACTGTGAAGCATAGATTGCTGTCAACAGAGAATTTTCTTAGTATTTAGGTATTTAGATTCAAAATATCAAAGGGGCCTATTAAGAACTTTTAAAATTGTAAAATAAAGATTAGGGATTGGTTTGGGTTGCGCTATATCTATCAAAGAGTATACAATAATGATGGATTTGGTGAATCAAATCCACGGTTTAATAACGAACCGTGTTAACTTACCATAACAACAACTCAATTCCTATCGAATTCCTTCCTATCGAATTCCTATAGTAAAATTCCTATAGGATAGAACGTACACAGGGTGTACACATTATATATGAATGAAACATATTCATTAACTTAAGCATACTCCTTTTTTTATTTAATGAGTTGATATTAATTGAATATCTTTTTTTTTTAGATTTTTGCAAAGGTTTCATTTACGCCTAATCCATATCGAGTAGACCCTGTCGTTGTGAGAATTCTTAATTCATGAGTTGTAGGGAGGGACTTATGTCACCACAAACAGAAACTAAAGCAAGTGTTGGATTTAAAGCTGGTGTTAAGGATTATAAATTGACTTACTACACCCCGGAGTACGAAACCAAGGATACTGATATCTTGGCAGCATTCCGAGTAACTCCTCAGCTCGGGGTTCCGCCTGAAGAAGCAGGAGCTGCAGTAGCTGCGGAATCTTCTACTGGTACATGGACAACTGTTTGGACTGATGGACTTACCAGTCTTGATCGTTACAAAGGACGATGCTATCACATCGAGCCCGTTCCTGGGGACCCAGATCAATATATCTGTTATGTAGCTTATCCATTAGACCTATTTGAAGAGGGTTCTGTTACTAACATGTTTACTTCCATTGTGGGTAACGTATTTGGTTTCAAAGCCTTACGCGCTCTACGTTTGGAGGATCTACGAATTCCCCCTGCTTATGTAAAAACTTTCCAAGGTCCGCCTCACGGTATCCAAGTTGAAAGGGATAAGTTGAACAAGTACGGTCGTCCTTTATTGGGATGTACTATTAAACCAAAATTGGGATTATCCGCAAAAAATTACGGTAGAGCGTGTTATGAGTGTCTACGCGGTGGACTTGATTTTACCAAAGATGATGAAAACGTAAACTCACAACCATTTATGCGCTGGAGAGACCGTTTTGTCTTTTGTGCCGAAGCAATTTATAAAGCACAAGCCGAAACCGGTGAAATCAAGGGGCATTACTTGAATGCGACTGCAGGTACATGCGAAGAAATGATTAAGAGAGCTGTATTTGCAAAGGAATTAGGGGTTCCTATTGTAATGCATGACTACTTAACAGGAGGATTCACCGCAAATACTACTTTGTCTCATTATTGCCGCGACAACGGCCTACTTCTTCACATTCACCGAGCAATGCATGCAGTTATTGATAGACAGAAAAATCATGGTATGCATTTCCGTGTATTAGCTAAAGCATTGCGTATGTCGGGGGGAGATCATATCCACTCCGGTACAGTAGTAGGTAAGTTAGAAGGGGAACGCGAAATAACTTTAGGTTTTGTTGATTTATTGCGCGATGATTTTATTGAAAAAGATCGTTCTCGCGGTATCTTTTTCACTCAGGACTGGGTATCCATGCCAGGTGTTATACCGGTGGCTTCAGGGGGTATTCATGTTTGGCATATGCCAGCTCTGACCGAAATCTTTGGAGATGATTCCGTATTACAATTTGGTGGAGGAACTTTAGGACATCCTTGGGGAAATGCACCTGGTGCAGCAGCTAATCGTGTGGCTTTAGAAGCCTGTGTACAAGCTCGTAACGAAGGGCGCGATCTTGCTCGTGAAGGTAATGAAATTATCAAAGCAGCTTGCAAATGGAGTGCTGAACTAGCCGCAGCTTGTGAAATATGGAAGGAGATCAAATTTGATACTTTCAAAGCGATGGATACCTTATAGATATAAGTAGATAAAACTAGATATAAAGAAGGTCTAAATAAAATAAAAAAGAAGAAAAATAGAAAGAGAAAAAATAAGTTAAGAAATGCAGTAATTCTTCTTTATTCTTCTGATTGATTGCAATTAAATTCGGCTCAATCTTTTCTAAAAAAAAGACTGAGCCGAATTTAAATAGATCTTGATACGATCATGAGACTTGACAAATCGAGATTCTTCTATTCTATATATCTAGAATATAGAAAGGTATAATACAATAAACAAATCTAAATAAAAATATAGTATTATCGTACGATAATGGAATCAAATACGCAGTATTTACAGAAAAGAGTCTTCGTTTATTGGGAAAGAATCAATATACTTTTAATGTCGAATCGGGATTCACTAAGACAGAAATAAAGCATTGGGTCGAACTCTTCTTTGGTGTTAAGGTAGTAGCTGTGAATAGCCATCGACTACCCGGAAAGGGTAGAAGAATGGGACCTATTCTGGGACATACAATGCATTACAGACGTATGATCATTACCCTTCAACTGGGTATTCTATTCCACTTCTACCCTTTAATTTAAAGGGTATTCTGAAAGAAGTATTTCTTTTATTTTCACAATAGCTTTCTTTTGAATCCAATTTCAAGTTCGATTAGAAGGATAGAAAGGCGATGAGAATGGGAAAAGAAAAATTCATTATTTTATTTTAATGAGTTCCCCTTTTTAGTTCCCCTTTTTTGCAATTTTCTTATTTTCAATTCCATTCATTTTTTTTATAGAATACTTTTTTATTCTATATCTATAAAAAAAATAGTATTCTATAAAAAATCTTTATTTTGTAAACTCAAAAATACAATAGTCAATATTCCTTATAATAGATATACTTAATTATATCATAAGAATCTTAAGATATATTTCGAATAGATAGAAATAGTAAATTTGAATTGAGACACATATTCTATGACAGATCTTAACTTACCCTCTATTTTCGTACCTTTAGTAGGCTTAGTATTTCCGGCAATTGCAATGACTTCCTTATTTCTTTATGTGCAGAAAAATAAGATTGTCTAGAAACGACGGGGCCAAATTTTCTCAATGTATTTCCAGGATCATAATACAGATATTTTTTTGTGTAAGTAGTATAATATGATAGGGTATGTAGCTCTTTCTACACACAAATGAAAAACGTCTATGGATGCAGATATAAGCTACGAGCATAAATGCATGCATATGCGTAGCCGACTATAGCGAGTTTTTTTTTTTAAGTGGATCCACTAATTTTTTTGAATAGAAAGTCAATGTATCTAACCAATTATTTCACAGGAGTACTAGCTACTGAAGGCTATTTCAGAATCAAAAAAAGTAAAGTCAAAATCATTTAGCTTATTCTCTCAATTTCAATTGACCGCTACTGGATTTAGTATATCTAATATGAATTGGCGATCAGAACACATATGGATAGAACTTCTAAAAGGTTCTCGAAAAAGAGGTAATTTTTTCTGGGCCTGTATTCTTTTTCTAGGTTCATTAGGATTCTTAGCGGTTGGGGCTTCCAGTTATCTTGGTAAGAATATGATATCTGTACTTCCATCTCAACAAATTCTTTTTTTTCCACAGGGGGTCGTGATGTCTTTCTACGGAATCGCGGGCCTATTCATTAGCTCCTATTTGTGGTGCACTATTTTATGGAATGTAGGCAGTGGTTATGACCGATTCGATAGAAAAGAGGGAATAGTGTGCATTTTTCGTTGGGGATTCCCTGGAATAAAACGTCGCATCTTCCTTCAATTCCTTGTGCGGGATATCCAATCAATTAGAATTCAGGTTAAAGAGGGTCTTTATCCTCGTCGTATCCTTTATATGGAAATCCGGGGCCAGGGGGTCATTCCCTTGACTCGTACTGATGAGAAGTTTTTTACTCCACGAGAAATTGAACAAAAAGCTGCCGAATTGGCCTATTTCTTGCGTGTACCAATTGAAGTATTTTGAGTACCAATTGCAATTTTTTGCAATTGTAAGGGGATTTTGAGTATTTATCTAAAGGAAGGGACAAACGAGGATAAGAGAAAATTGCTTCGAATTTGTTTTGTCCAAGTGAGATATATGGCATACTATTCTTCCATTTTTATATGAAAGGCCTTTTTTTTATTTCTCTATTCCACTCCATTTAGATCTAAGAAAGAACCCAATACAATGAAATTTCACTAGTATACAAAAAGAGAAATAGATACAAATACAAGGTCTCAAACCTTGTTATAGAATTTTTGCTTCAAAGAAAAGAAATATCATATATATTCAGCAAATGAAATAGAGTCGGCGAATGAAGCGGATTCATTAACAACTCAATTTACAGATCAAAAATGAAAAAAAAGAAAGCATTGCCTTCTTTCTTATATCTTGTATTTATCGTACTTTTGCCCTGGGGAGTCTCTTTCTCTTTTAACAAATGTCTGGAACTTTGGATTAAGAATTGGTGGAATACCAGGCAATCCGAAACTTTCTTAACTGATATTCAAGAGAAAAGGATTCTAGAAGGATTCATAGAATTAGAAGAACTTTTTCTCTTGGACGAAATGATAAAAGAGAAACCGAAGACACATGTACAAAAACTTCCTATAGGAATACACAAGGAAATAATACAATTGGCCAAAATAGATAATGAGGATCATCTCCATATCATTTTGCATTTCTCAACAAATATAATCTGTTTGGCTATTCTAAGTGGTTCTTTTTTTCTGGGTAAAGAAGAACTTGTCATTTTGAATTCTTGGGTTCAGGAATTTTTCTATAACTTAAATGATTCAATAAAAGCTTTTTTTATTCTTTTAGTTACTGATTTTTTTGTTGGATTTCACTCCACCCGCGGTTGGGAACTACTAATTCGTTGGGTCTACAACAATCTTGGATGGGCTCCTAACGAGCTAATTTTCACTATTTTTGTTTGTAGTTTTCCTGTGATTCTAGACACGTGTTTGAAATTTTGGGTCTTTTTTTGTTTAAACCGTCTATCTCCTTCACTTGTAGTCATTTATCATTCAATTAGTGAAGCATAAACTCACTCATTTGATTTCCTAATATTAATCAAATTAGCATATTTCTTCCTTTAGAAAGAAAGCCCTTTTCCTTTTTAACAAAATTCTTTCTATTTCTACCTGCTCAAGGTATTCATCATTCTAGTACAACTATTGCAGTAGAATGACAACAGACTCGTGTATAGGGAACTAGATTAGCTTAGCTACCTATCTAATTTATTGTAGAAATTCCGGGATCCGCGATTGGACATGGAAAATAGAAAAACTTTTTCTTGGTTAAAGGAACAGATGATTCGATCGATTTCTGTATCGATCATGATATACGTAATAACTCGCACATCTATTTCAAACGCATATCCCATTTTTGCGCAGCAGGGTTATGAAAACCCGCGGGAAGCAACTGGACGAATTGTATGTGCCAATTGCCATTTAGCTAATAAGCCTGTAGATATTGAAGTTCCCCAAGCAGTGCTTCCTGATACTGTATTTGAAGCAGTTCTTCGAATTCCTTATGATATGCAGCTGAAACAAGTTCTTGCTAATGGTAAAAAGGGAGGGTTGAATGTGGGTGCTGTTCTTATTTTGCCCGAGGGATTCGAATTAGCGCCGCCCGACCGTATTTCTCCTGAGTTGAAAGAAAAGATAGGAAATCTCTCTTTTCAGAGTTATCGTCCCAATAAAAAAAATATTCTTGTGATAGGCCCAGTTCCCGGTAAGAAATATAGTGAAATTGTCTTTCCCATTCTTTCCCCCGATCCCGCTACAAAAAAAGACGTTCATTTCTTAAAATATCCCATATATGTAGGGGGAAACCGAGGAAGGGGACAGATCTATCCTGATGGTACCAAGAGTAACAATACGGTCTATAATGCTACGTCAACAGGTATAGTAAAAAAAATACTACGTAAAGAAAAGGGGGGATATGAAATATCCATAGTGGATGCGTCGGATGGACGCCAAGTGATTGATATTATACCTCCCGGGCCAGAACTTCTTGTTTCAGAGGGGGAATCAATCAAGCTTGATCAACCATTAACAAGCAATCCTAATGTAGGAGGGTTTGGTCAGGGGGATGCAGAAATAGTGCTTCAGGATCCATTGCGCGTCCAAGGCCTTTTGTTCTTCTTCGCATCTGTTATTTTGGCACAAGTTTTTTTGGTTCTCAAAAAGAAACAGTTTGAAAAGGTTCAATTGTACGAAATGAATTTCTAGATCCTGGGATTTCTTACCATCAAGTTAGAAAAAAGCCTCGATTTCTGGAATTCCTTATTTCTATCTCATGCAAAAGAAGAGGATCCAAGGCAAAGACGAGAACAATAAAAGCAACAAGTCCTTTTAGGAGGAATTGTGGGTCTTCTTAATCCTCTATTGGGCACAAGAAAAAGGCAAAAAAGCCTTTTTCTTGTGTCGATTCTTCTTGTATCGAAGTAAGAATCATTTTTCTTCTTATTTGTTTTGTCAAAGATTACTATTTATTCTTTATTCGGGTCTGTCTTTTGGACTTCCTTTGCTTAGGTTCGGGCGCGGTAGTGGACAAACAGAGGGAAAGAAAGTATGGCGGGGGACAAATTTCTTGTGAGCAAATAGAATTGCTTGACTTTTTCAATTAAGTTCAACTTTGAACTTACAGAAATTTTGTAAAAAAAAATCTATACCTTCCCATGGAAGGGTGGTTTTGATTTTTAGGCTAGTTGAGTAGTTTTGATTAAGGTTTTATTAGTTTATTACTCGAAACTAAATCAACGATTTGCAGGATACTTCCTTCATGGAATAAAATACTGGAACCTCTCCCCTCTTTCTTGTTGCTTCATAAGAGTGAATCCATTTTATGGGCGAAAGGCGGGGGCTTTAAATCGACCGATGGATTGCTTCACTCACTAACATCATTAACAAACAAAAGAATAAATACAGGGATTCCAACCATCAGAGCAAAGGTTTTCTCTTTGTTATTTTTACAAATAGAAATAGGTAACCAATTTCTAGATTATGGAATAAAACCGCGTTATAACAATAAGAATTCCGCGGGCCCTTTCCGCTCTAATCAGATAAAGGGGAGTAAGGACCCGCTAAGTTCCTACTTTTTCATGTTTACAATCTGGATCCTCCGATTACTATAGAGATGAACCCAATCCAGAATACGAACCGTAAAAGAAAACACCTATTAAACCAATCACAAGAATACCAGTTACAGTACCTATCAGCCAAAGAGGAATTCTTCCAGTAGTATCGGCCATTTCCCCTACTTTCCTCCACATTTTCTCAAGTGGTCATGCTAGAGACAAAAACAGTCATGGATAGTTATAAAGATGGTATCCTTCCAAATGGGATAAGAGAATTCTTACTACTCTCTTTCTTTCTCTCAATTGAAGAAGTAATTGGAAAATAAAACAGCAAGTACAAAAATGAGTAATAAACCCCAGTATAGACTGGTACGATTCAATTCAACATTTTGTTCATTCGGGTTTGATTGTGTCATAGTTCTATAGTTGGAATTTGGTTTATCGTTGGATGAACTGCATTGCTGATATTGATCCCAAGAAAAAAACCGTGGGTACAGCTAATCCGTGAACAGCCAGCCATCGCACTGTAAAAATAGGATAGGTTCGATCTATGGTCATTGGGGGCCTCCTAAAAGGATCTACTAAATTCATCTAGTTGTTCTAAAGAATCAAAACGGTCGGTTATTAATGGAATTCCTTGTCGGCTTTCCGTGAAATACTCGTTTGGTCGAGGACTTCCAAACACGTCATAAGCTAAACCCGTACTGACAAATAACCAACCCGCAATGAATAGGGAAGGTATAGTAATGCTATGAATAACCCAATATCGAATACTGGTAATAATATCAGCAAAAGAACGTTCTCCCGTGCTTCCAGACATGCTGAGCTCCCAAAATTTTTATTCAAAAAAGGAATTGATTCCGTAAAAGATGGGATCCACCAGTAAATAGAAAATTACTGATATTTCATCCTTGTGAGATTGTCAATTTTGTACCAAAGGTGTATTTTGAGTATACCGAATTAGTATAGCTATCCTTCCTATGGCACAGCAATCCAGTTTTGCTTGGTCCCGAAACAGAATTCCTTTTTTCTCTTTTTTGTTCCTTGTCTATAGGAAAATTACATGTTATTCAAGGCATCAATAGAACCCCACAATTTTTGGGGTCCTACTTATTTTCATTGTCTTCGGAATAGTAGAATAATTTAATTTGGAATAGCGGCCAAGATCTTGGGAAAACCTAAGTTAATGATTAATAAGATAAAGAATTTAGGAAGGATATTCTCATATTGACGCAATACAAAGATAAGTATATGCAAAATCTATCCCTTTTTAGTTAAAGGAATTTAATTGGTTAGCATAAAATAATATCTAATAAATAGAAAATCGAATAGTGGATAATCCGTTATGAAAGAAACGGAATACATTCTTTGAAGAATCAAGATTCGTAATCAATCCTTGTCTTGTTTGTTGGATTAGGTCTAACTTTCTTGACCAAACAGCAAGCATGGAACTTTACAAGAAGAACTTAAAAGAAAAGGATAATTGAAGTAACTTCGAATCAACTTTTGTTGGGGTTCAAAAAACGAATAAAAAAAAATAAAAAAAAGTAAATTCAAGGAATAGTTCCCTTTTTGAGGGGGCCCCTCGGGGGTCGTGGAATGCTTTTCTTCTCCTCTTATTCCATATGGAATACAATGAGTTAAAATAAGAAGGAATAGGGGAATATTCGACCGTTTGCTCCAAAAAGAGGATGAAATCCATCCTATTAAAAAAGAAATAATCCGAAATAGAAAGAATTTCTTTTTTCAAATTCAATTCTTTATTTATCTTTTATTCCAAAATTCCCCCGAAAATCCAATTTCATTTTTCAATGGCGTTAGATGATCTAGTTCTTAATATTATTAGTTTACTTAACTGACAGATTCCACAACAAATCTCTTGATTCGGAATTAGGGACTCATGTTCCGTCTGATGAATCGATTTTCTCTTTTTTTTACACTTCTGTATCTCACTCTATCTTGAACTTAAACTTAGGTAAGTGCTTTACCAACATTATGTAGTGTAGTAAAAAAAAATGGAATTTAACCCCTTCATGCTTACTATAACTAGTTATTTCGGTTTTCTACTGGCTGCTTTAACTATAACCCCAGCTCTATTTATTGGCTTGAACAAGATACGTCTTATTTGAAATGAATTGAATGAATAGAAGAATCTTTCTTTTGGATTCCTGGTACTCTAAACTCTTTTCCACACTAATTACCAATTCTTTTCTTGGTCATTGAGATTCGTGGGTAGTTTAGACTATTATTTAGAGATAGATCGTACCTCTTTTTTTATCCCCTCGAACAAATCGAAATGATTGAAGTTTTTCTATTTGGAATCGTCTTAGGCCTAATTCCTATTACTTTAGCGGGATTATTCGTGACTGCGTATTTGCAATACAGGCGTGGGGATCAGTTGGATCTTTGATTGAGTAATATTTCTTTTTTGATTGACCTCCTCTCTGGTCTGGAGGAGGTCAAATTGGAGTTGCAATTCTACTTTGTTTTTTTTTTAAGTTATTTTAGTTTCGACATAAGATATATGGAATCACGCTCTGTAGGATTTGAACCTACGACATCGGGTTTTGGAGACCCGCGTTCTACCAAACTGAACTAAGAGCGCTTTCAAAACAAAAAAAAAGAAAATCCTTTTCTATTCCTAACGTGTCTCACGTCCGTATAGTATCCACAAATTCAAGTTATACCCACTTTACTTTAATTGATCTCCCCACTACTGCCCATAAAGAAGAGATAATTAATAGGTAGGGATGACAGGATTTGAACCTGTGACATTTTGTACCCAAAACAAACGCGCTACCAAGCTGCGCTACATCCCTTTTCCAAATTGTTGTACAATGCCATTGTACACAATTCCTTTCTTGTTTTCCACATCGTAATTTTCTTCTATTTCTTTATCCATATAGAACTTTCTTGTCATTTCTTGTTTTTGGTCTCATATAATCAAGGAAGGGTATAAACTAAAATCCAGTCAAATTTCACCTATAAAAGAAAGACTACTATTCCTTAGTAATGTATAGGAAGAAGGGGTCATCTTTTTTAGGGATAGGAAAATCTCGTCTATACGGTTCATTCTATATATATAGAATATTTCTTTTGTTTTTTTAGTTAGGAATTTCGCCTAAACAAAAGAAATACAAAGGATCTTGGGCAAGAGTATCTGATCATATATGTATTCCAATACGGAAGGAGGATTTTCAATGCGGGATATAAAAACATATCTCTCTGTAGCACCCGTGCTAAGTACTCTATGGTTTGGGGCTTTAGCAGGTTTATTGATAGAAATCAATCGTTTATTCCCAGATGCTTTGTCATTCCCTTTTTTTTAATTCTAGTTATTCCTATGCAAGAGATAGAATTCTTCGTGACATGACGAAAATTTTCCCTTTTTGAATTCTTTTTTAGTATATGAAGCAAAAAGAAAGAAAAGATGGATAAGGATTGTATTCTTTAATTATTTCTCTATGTTTTATTACTTAATTTATGATTTACGAATTTCAAAATTTTTTTTTTATTCTATTGGATTGGATTTGTTCGAGAATTCGAAGAATTACAACAAAATCTTTAGAAATCACATTTTTAGTTAGGAACTTCTATGGATTTTATTCTTCTTCTTTTCTTGGGATCCAAAATAGAAGAATAAAAGAATAGGTATAAGAATTAAGTTAAGTCGATCCAAAAAGGAAAGGAGGTTCATGGCCAAGGGCAAAGATGTTAGAATCCGAGTTATTTTGGAATGTATTAGTTGTGTTCGAAAGGGTACCAATAAGGAATCGACGGGGATTTCTAGATATAGTACTCAAAAGAATCGCCACAATACGCCCGGACAATTAGAATTAAGAAAATTTTGTCGTTATTGTCGAAAGCATACCACTCATAATGAAATAAAGAAATAGGAGCATCGTGTGTTCGATTTTTCCAAAGAACAGAAAGAGTAAGAACTTCTTATTAAATATATAGAACATAGATAGAATACAAAATACAAATCAACTAATCTGATTTTAGGTAGATATTATTTCATATGTATAGAGGGTTTTTATTTTTATATATTTGGATTTTTTATATTTTTATTTTTTATATTTTTATATAGTATATTAATCAAATAATATATGGACCAAAGAAAGACTACTTCTTCTGGTTCTGGATCAAAAATTAATAAAATAAAGAAATCTTTTTTTTTTTTCAAATTTTTAAATAAGGAATAAATCATGTATATATCTAAACAACCTTTTCGTAAATCTAAGCAACCCTTTCGTAAATCCAAACAACCTTTTCATAAATCTAAGCAACCTTTTCGTAAATTCAAACAACCTTTTCGTAAATCCAAACAACCTTTTCGTAGGCGTTCTCGAATAGGCCCGGGGGATCGAATTGATTATAGAAACATGAGTTTAATTAATCGATTTATTAGTGAACAAGGAAAAATATTATCCAGACGAATAAATAGATTAACCTTGAAACAACAACGATTAATTACTCTTGCTATAAAACAAGCTCGTATTTTATCTTTCTTACCATTTCGTAACTATGAGAATGAGAAGCAATTTCAAGCCCAGGCAATTTCAATAATTACTGGTCCTAGACACAGAAAAAATAGACATATTCCTCAATTAACACAAAAGTTCAATTCCAATCGAAACTTAAGAAACTCCAACCAGAATTTAAGAAACAACAATCGAAACTTAAGTTCCGATTGTTGATGTTTTATTCGAAAGGCTCAGACTCATATATAAAGAAAGTAATCCAATTTTGATTCTTGTGTTTGTTATAAGAAAGAAAAATGGGAAAAAAGAAATAGTTTTTTTATTTATTGCAACATGCTCGTTGATTCCTACCACTTAATCTTAATTTATTGTATCTTCCCGGAGTTCCCTCTCCGGGAATTCGGTTTTAATTATTCCTGTATATTACTTTTTTATCCTTTAATTGATAGTCCTTATTTTATTGGAAATCGTGTAAAGATTATTTGGATTTGATACAGCTACTTGTGCAAGCATTTTACGATTAAGAATCAATTCCTTCTTGGACAGATTGTGTATTAATTTACTATAACTATTGAATACGTTATATACCCGTGTTGCTGCGTTTATCCGAGTGATCCACAAACGACGAAAATCCCTCTTTTGCCTGCCTCTATCTCGATGAGAAGAAACAAAAGCTCTTCTTACTTGTTGAGTAATCATTCGATTAAGTCTTAAATGAGCCCCTCTAAAGTTTGAGGCAAATGAACGCATTTTTGTTCGTCGTCTCCGAGCTATATATCCTCGCGGAACTCTGGTCATTGAATCAAATTAACCTTAATGAATAACTAATGATTTCTCTTCTTTTAACCCTCTTTTTTCCCATTAATAACTAAACGGATTATTCCGATATATAAAATATTAATTCCAATGGCTTTTGCTACTATAACCTTCCCAACCACGATTTTTTATTCTATTCAGTTATTTCGCATAGAAATAACAAATTCTAACGATACTAAAAAAACAGTGGGTTCCATCGTTTTTATGGTTCCCTTTTAAACGGCGAGGCCCTCTCTATACACCGGAGCCCTTTCTTTCATTTCATCAAAAGGTATTGTGAACTTGTATAGTTCACATTCTTTGGCTCTACCTATCCATTATAGAGTAAATAACTCTTTTCACAATAAGAGTTATTCATACAGTGACGGTATTTAATTATGAAAGTTGGCTAAGTAGCTGACCCTTTAGTCCGTTCTTTTAAGATAAAGGAGCATAAGCCTTTTTCTTTTTATTACTATTTCCTCCGCTTAATGGATAACCATTTGTTACCAATGGGGGAATTGCTTCTTCCAATCTAGATGATTGGATTTGCACCAAAGGAAACCATAAATTCCATATACCATAGAAATCTAGGATAGAGCTTCTCTATCCTATTCATTGGTACCGATCATGGATACTTCAAAAATTTTATTATTTGTTTGAACTCATGATCTGAACGAGTCGCACATACACCCTAGCACATGTTCCTCGACGCTGAGGACATCCCTTAAGCGCGGCCGATTTTCTAGCATTTCGTATTGGCTGTCTTGCATTTCTAATAAGTTGTTTAACCGTTGGCATGTCGTATGTATATATAAAATGGATTGGTTTAGATCGATCTTAACCTGATGATTCATCATCATGAAGTATTTCTATTTTCTATAGCATAAAACCCGAATTTAGGTTTGAAATAAATTTACAAGGAATCCACCCACTACCAATCCTTAAACATTTCTGGAAACCACACTGGATCAGTATCGCAGTGCTCGTCAATCATTTCATCCCCTACAATATCGACAAGTCCATAAGCTTTGGCTTCGTCTGCTGACATAAAAACATCCCTTTCCATGTCTTCGGATACAACCCAAAAAGGCTTGCCTGTTCTTAGTGCATAAACCCTTGTGATCATTTCGCGAACTTTGTGTAACTCTTCCACTTCTAGTAAAAATTCTGGTGTCCTTGCCCGATAATAAGCACTAGCAGGTTGGTGAAGCATAATCCTAGCGTGAGGGAATGCTATACGCTTGGTGGGTTCTCCTCCAAGCAGAATGAAGGAGGCCATGGACGCGGCTATTCCGAGGCATATTGTATATATATCAGGTGTCACCGTTTGCATCGTATCAAAAATCGCCATTCCTGAGATTAGCCACCCGCCAGGGGAGTTTATAAACAAAAAAATATCGCTATTTCCATCTTCTATACTGAGATATACCATCAGACCTGTAATATGATTCGTGATCTCGCAACGAATCTCTTGACCTAAAAAAAGTGTCCTTTCTCGATACATAACATTGTATAAGTCAACCCAAGTCGCTTCTTCATCTCCGGGAATCCGGTAAGGTACTTTTGGAACACCAATGGGCATATTAGATTAATATTATTAAATTTAAGTAAAAAAACTACACTTTAATATGGAAACGTAAGAATGGAAGAGAAAGAAAGAATCCGCAGTTTATTATCTTCATTTTTTTCTTATTCTATAAGAATACTATAGATTCTATTAATACATAGATTGAAATAATACATAGATTGAAAGATTCTACATATAAGGAAGGTAAGACAGATTGAATAAAGAAAAAGGAATCCGTGATTCGAATGATAAACAAAGAGGGATGAAGGATCTATTCTTCGTTTTTCCAAATAGCCCAAGCTACCCATTGCATATTGGCACTTATCGAGTATAGAATAGATCTGCTTCTCTTTCTTCTTACAAACAGAATTGGCTTGTTATTTTTAATGGAATGAAATAAATATTCACGCTTTCTGACATAGAATCCCCTAGAAGGGTTAGGTACATAGAATATGTATGGACAGTCTTTTCCAATGCGATAAAATAAAGCGACATCGTGTCTATTTTTCTTTGCTAAAGGGGTATTTCCATGGGTTTGCCTTGGTATCGTGTTCATACTGTCGTATTGAATGATCCGGGTCGATTGCTTTCGGTGCATATAATGCACACAGCTCTAGTTTCTGGTTGGGCTGGCTCGATGGCTTTATACGAATTAGCAGTTTTTGATCCCTCTGATCCTGTTCTGGATCCAATGTGGAGACAAGGTATGTTCGTCATCCCCTTCATGACTCGTTTAGGAATAACGAATTCGTGGGGTGGTTGGAGTATTTCAGGAGGAACTGTAACGAATCCGGGTATTTGGAGTTATGAAGGTGTGGCAGGTGCGCATATTGTGTTTTCTGGCTTGTGTTTCTTGGCAGCTATCTGGCATTGGGTATATTGGGACCTAGAAATATTCTGTGATGAGCGGACGGGAAAACCTTCTTTGGATTTGCCCAAGATCTTTGGAATTCATTTATTTCTTGCAGGGGTGGCTTGTTTTGGCTTTGGTGCATTTCATGTAACGGGTTTATATGGCCCTGGGATATGGGTGTCCGATCCTTACGGACTAACTGGAAAAGTACAAGCTGTAAATCCTGCGTGGGGTGCAGAAGGTTTTGATCCTTTCGTTCCGGGAGGAATAGCTTCGCATCATATTGCTGCGGGTACTTTGGGCATATTAGCGGGCCTATTCCATCTAAGTGTCCGTCCGCCTCAACGTCTATACAAAGGGTTACGTATGGGCAATATTGAAACTGTACTTTCCAGTAGTATCGCTGCTGTTTTTTTTGCTGCTTTCGTAGTTGCCGGAACTATGTGGTATGGATCAGCAACTACCCCAATCGAATTATTTGGGCCTACTCGTTATCAGTGGGATCAGGGATACTTTCAGCAAGAAATATATCGAAGAGTTAGCGATGGGTTAGCCGAAAATCTTAGTTTATCAGAAGCTTGGTCTAAAATTCCCGAAAAATTAGCCTTTTATGATTATATTGGTAATAATCCGGCAAAGGGGGGATTATTCAGAGCAGGCTCAATGGACAATGGGGATGGCATAGCTGTTGGATGGTTAGGACATCCCGTCTTTAGAGATAAAGAAGGACGCGAGCTTTTTGTACGTCGTATGCCTACTTTTTTTGAAACATTTCCGGTAGTTTTGGTAGATGAAGAGGGAATTGTGAGAGCGGACGTTCCTTTTAGAAGAGCAGAATCCAAATATAGTGTTGAACAAGTAGGCGTAACGGTGGAGTTCTATGGTGGCGAACTTAATGGAGTAAGTTATTCTGATCCTGCTACTGTAAAAAAATATGCGCGGCGTGCTCAATTAGGGGAAATTTTTGAATTAGATCGAGCTACTTTGAAATCAGATGGTGTTTTTCGCAGCAGTCCAAGGGGTTGGTTCACTTTTGGTCATGCTACCTTTGCTTTGCTCTTCTTTTTCGGACACATTTGGCATGGCGCTCGAACCTTGTTCCGAGATGTTTTTGCTGGTATTGATCCAGACTTGGATGCTCAAGTGGAATTTGGAACATTCCAAAAAGTTGGAGATCCAACTACAAGGAGACAGGCAGCCTGATACCACATTGCTATGGTATCTTTCACCTCTCTTTTTTGTTTGATTTGACATGAGGAACATCTCCTGTCCTTTCTTTGACTCTTTTTCTTTTTTTATATGGGAAATGATCCCAAATGATAAGTGAATAGGTGTGGAAGTTATAATTGTAAATAAACCAGGATCGAATCTATGGAAGCATTGGTTTATACGTTCCTTTTAGTTTCGACTTTAGGGATAATTTTTTTCGCTATCTTCTTCCGAGAACCACCTAAGGTTCCGACTAAGAAATGAAATTTTAATTGAAGGAAAGAAATAATTTAATTGAAGTAAGAAGTCCCCCGGAGGGGAGACTTCTTACTTCAATTAGTCCCCGTGTTCTTCGAATGGATCTCTTAATTGTTGAGAGGGTTGCCCAAACGCGGTATATAAGGCATACCCAGTAAAGCTTACAAGTAAACCAGATATGGAGATGGCGACTAAAGTTGCTGTTTCCATTTTTATAGAATTTCAAGATTACAATGGATCTATGAAAAGATCGTGTATTTACAACTACAACGGAATAGTATACAAAGTCAACACCAATGATTAAATAGAATTTATGGCTACACAAACCGTTGAAGATAGTTCTAGACCTAAGCCAAAACGGACTGGCGCAGGTAGTTTATTGAAACCCTTGAATTCGGAATATGGGAAAGTTGCTCCGGGTTGGGGGACTACTCCTTTTATGGGGGTCGCAATGGCTTTATTCGCGATATTCCTATCTATAATTTTAGAAATTTATAATTCTTCTGTTTTACTGGACGGAATTTTAACGAATTAGGTTTCTACTAACTAAAACTATGACTTCATAGTTTTCCCATCCAAAAAAAGCCTTTCTACTTTAAGCTCCACATTTCTAGACATTCTGGTAGTTCGACCGTGGATTTTTTTGTTTTGGTATTTCTGGAATATGAGTGTGTGACTTGTTAGAATTGATCCTATTGATAATACATAGAAAGGGCCTGTTATCTCTATCAAGATGATTCTAATTCGTCGGATATTATTTATTCTAGTATCTGGAACACGAAATACATAGAGTGGATCAAAAAAAAAAGGAACTATGATTCATACTCACTATTTAGACCTCGCAACCAGACTGAAAAAAAAAATTCAAGTAGTTCTTAATAAAAAAAGAAATTTTCTTCCTTCCAATTTTGTTTGCCCAAAAGAGAACTCTTTTCTCTTTCAATAAATGATCATCAAGCGGTTCTTATTCGAAGAACCCTTGCCTTTTGTTTATCTTGAGACTCAATCATCGTGGCTCTAGTATGAATCTAAGGTTTTAATTGAACTGATTCATAGGATCGCAACAAGATAATTTCTATCAGAAAACCACTAGAAATTTTTATTTTCTTTTTTGACTAGTCAAAAAAGAAAATAAATAAAAAATAGGGAAGAGAAAAGTCAAGAGGCCTCTAATGATCAACATAAGGGAAAGAAAGACAGATGAGCCAACTTGAGATTTTTTGGCATTATTATCACAAAGAAGAAATTCTGGATTTTTCTTATTTCATATCTTCAAGGCAAATCGATCCAATACCGTGGCTGATGGAGTTTTGAACCTTTTTTTCTAATATCCGTTGAAAATTTGTGTATTTTTGCTTGAGCCGTACGAGATGAAATTTTCATATACGGTTCTCGGAGGGGGAGTCGGGCTAGTTACCTATCTCAATAAAGTATATGATTGGTTTGAAGAACGTCTTGAGATTCAGGCAATTGCGGATGATATAACTAGTAAATATGTTCCTCCTCATGTCAACATATTTTATTGTTTAGGGGGAATTACACTTACTTGTTTTCTAGTACAAGTCGCTACCGGTTTTGCTATGACTTTTTACTACCGACCCACCGTTACAGAGGCTTTTTCCTCCGTTCAATATATAATGACGGAGGCCAACTTTGGTTGGTTAATCCGATCGGTTCATCGATGGTCAGCAAGTATGATGGTTCTAATGATGATCCTGCACGTATTTCGTGTGTATCTCACAGGTGGATTTAAAAAACCCCGTGAATTAACTTGGGTCACAGGCGTGGTTTTGGCTGTATTGACTGCATCATTTGGTGTAACTGGTTATTCTTTGCCTTGGGATCAAATTGGTTATTGGGCAGTCAAAATTGTTACAGGTGTACCCGAAGCTATTCCGGTAATAGGGTCCCCTTTAGTGGAATTATTACGTGGAAGTGCTAGTGTGGGCCAATCCACTTTGACTCGTTTTTATAGTTTACATACCTTTGTACTACCTCTGCTTACTGCCGTATTTATGTTAATGCACTTTCCAATGATACGTAAGCAAGGTATTTCGGGTCCTTTATAGGGAAGGCATATCATAGAGAATTCTAATTCTCATATATCATATCGGGTAGGTTGTGGTATTTCATTGCTACAAACATGGGTTATTGTAAAATAAGACATGTCATTTGGATACTTCTCTTCAACTTCGAAGTATTTTTATACAAATAGTTGAAGTGAATTTTACGAAAGAAAATAAGGCGGATTATGGGAGTGTGTGACTTGAATTATTGATTTGGCCATGCAGATAGAGAATTGGATCTGCCACATTAGAATTCACGACCAAAGGTGTCTCCGCATCCAATCAACACGTAAGTCCCCTATCTAGGAAGGATAGGCTGGTTCACTCGAGGAGAATATTTTCTATGATCATACCCCAACCATGTCATCCATGAACAGGCTCCGTAAGATCCTATAAAGTATAAATGGAATAAGTCATGTGATATGATCCAATTCTATTTTTATTACACTTACTTTTTATTATAGTATGGAAATGCATTCATTTTCTTTGCATCGATTTTGATCCGCAATACTATCGGAGTAAAAGAAGGGATCTAAGGAAGAACGCAGGCTAAACTTTTTGATTTTTTATTAGTAACAAGTAAATACTTTGTTTGGACATAAGAAACTTGCGATATCGAGGGGATAAACACCAACTAATCAAGAGACAATCCACAAAGCAATTGATCATGATCAAATTTGTAAGCCCACTTGGATATTGAGCATTTAAGCATAAGAATAGGATTCTTTTCAATGAGTAGTTATAGGCGCAACTTCGGAAAAGATAATTTGATAAAGCTTTTCTTACCTTGAGTCATTGAGTCATTATATACCCTATTCTATTGTGGATCCTCCACGGTCTTATTTCTTTCATTCTTGCTCGAGCCGGATGATGAAAAATTCTCATGTCCGGTTCCTTTGGGGGATGGATCCTAAAGAATTCACCTATCCCAATAACAAAGAAACCTGACTTAAATGATCCTGTATTAAGAGCAAAATTAGCTAAAGGGATGGGACATAATTATTATGGGGAACCCGCGTGGCCCAACGATCTTTTATACATTTTTCCAGTAGTAATTCTAGGTACTATTGCGTGTAATGTGGGTTTAGCGGTTCTAGAGCCGTCAATGATTGGTGAACCGGCGGATCCGTTTGCAACTCCTTTGGAAATATTACCCGAGTGGTACTTCTTTCCCGTATTTCAAATACTCCGTACAGTACCCAATAAGTTATTGGGCGTTCTCTTAATGGTTTCTGTGCCAACGGGCTTATTGACAGTACCCTTTCTAGAGAATGTCAATAAATTCCAAAATCCATTTCGTCGCCCAGTAGCTACGACCGTTTTTTTAATCGGTACTGCAGTAGCTCTTTGGTTAGGTATTGGAGCAACATTACCCATTGATAAATCCTTAACTTTAGGTCTTTTTTAGTTTAGGGATTTTTCGAGTTGATTCATTCCACCGCGAAGAAGTCCCCTGCATGGGTATCTAGGAAATAGTTACTTCCAAGTGAATCTTCCCTAGATACCTAAAATCTATTTTATTATGATCCATTTCGCGAAAATATAGATTGTGCCAAAGATGCAAAATTGCTTTCTTTTTTCTTTTTATTCTAACTCAAAAAAGAAGAAGAGGAAAAAATTGCAATGATTTAAAGCGAGAACTTGTTCTTAGGTAAATCAATTGGGAGATGCTTCTCTAGAGTGTCCCATATCAGTTTTCCATCTTCCATACGAAAACTATTAATTCGCATAAGATCTTCTTCAGTCTTACTCAAAAGGTCCAATAGTGTATGTATATTGGCCCTTTTGAGACAATTATACGTTCTAGAAGGCAATTCTAATTGATCAATAAAAATACAATTCAATGGAATTCCTTTTTTGTTTTTCTTTAGATTAGTGAATCTTTTTTGAAAGGTTAAAAGGGGTGGAGTTAACCTGTTTTTATTTTCTTCGAAACTAGTGCCCTCTTCCTCTGTGTGTATAAAAGGAAGAAATAAATCAATCAAATTACGAGAAGCTTCATAAAGCGCTTCTTTAGGAGTTAAACTTCCATTCGTCCATATTTCTAAAAAAAGTATCTCGTGTTTTTCATTTCCATTCCCACAAGAAAAAATACTATAATTCACATTTCGAACAGGCATGAATACAGCATCTATAGGATAACTTCCATCTTGAGAGTTCTTTCTGAGTTCCGTATGATATCCGCGATCTCTCTTGATCTGTAACTCAATACAGAAATCAACGGGCTCTCTCAAGTTAGCTATAGGTTGTGTCGTATCAACGATTTCTACGGAAGGCGGTAAGATTATATCTTGAGCGGTTATGTATCTAGGACCTTTGACGCAAATTGATGCGTCTCTAACTCCATAGAGATTACTTCTCAATACAATTTCTTTCAAATTTAGTAAAATTTCTTGTATGGATTCTTCAATACCTACTATTGTGGAATATTCATGTGGCACGTTCCAAAATTTGGCGCGTGTGATACATGTTCCTTCTATTTCTCCAAGTAAAGCTCTTCGCAAGGCAATACCGACAGTATCCGCTTGCCCTTTTCTAAGCGGAGACAGAATGAAACGACCATAATAAAGACGTTTACTATCTACTCTTGATTCAACACACTTCCACTCTAGTGTTTGAGTGGATCCTGTTATCTCTTCTCGAACCATAACAGACTAGTATTATTATTTGATCATTGAATCGTTTATTTCTCTTGAAAGCGGTTTCATTTTTTTTTACAGACGTCTTTTTTTAGGAGGTCGACATCCATTATGCGGCATAGGTGTTACATCGCGTATACAACTTAACCGTACACCACTTTTAGCAATGGCTCGTAATGCGGCATCTCTTCCGCTACCAGCACCTTTTACCATAACTTCTGCTCGTTGCAAACCCACTGTACGAATAGCATCTACTGCTGTTCTTTGACCAGCATAGGGTGATGCTTTTCTTGAGCTTTTGAATCCACAAGTACCTGCGGAGGACCAGAAAACGACCCGACCTTGTGGGTCTGTAACGGTTATAATGGTATTGTTGAAACTGGCTTGAACATGAATAACCCCTTTTGTTATTCTACGTGCACTCTTCCGTAAACTAAAACGGGCATTCCTACGCAAACCAATACGCACTTTCTTACGTGAACCTATTTTTGGTATAGCTTTTGTCATATTTTATTATCTCATAAATATGAGTTAGAAATAACAAAAAGAAAAAAGATACAAAGATATCCGTTTCGGGTTAAAATATATCCTTTACTTTCATTTTTTTTTATTTGCAATTTGGACATTTCCGTGGGTACTTTTTTTTTTTTACTTTATTAGAAATTAGAAAGAAAAGCTTCTTTTTCGAAAGATTACCCCTGTCTTTGTTTATGCTTCGGATTGGAACAAATGACTCTAATTCGCCCACGCCTGCGAATCAGTCGACATTTTGTACAAATTTTACGAACGGAAGCTCTTATTTTCATATATAGGTATTCCTTTCTTAAACTATGAATCTATTCTTTTGGAAAAAATAAGTCTCTTCACTTAAATTCTGAAACTTGGAAGTTATTACCCCAGAAAAACCTAATCCTTTGAATCTTTGGTATCCTTCAAATCTTCAGTATCCTTCGAGTCTTCGGTACGCTTCGAATCCTTATGGGGAAGTCTATAAATTATACGACCTTTGCTGGAATCATAACGACTTACTTCAATTTTGACCCTATCCCCCATCAGTATTCGTATAGAGCTAGACCGGATCTTTCCTGAAATATAGCCCAGGATGATCGTGTCATTCTCTAGGCGAACGCGGAACATTCCGTTGGGTAGGGCTTCCGTAACTAAACCTTCGAAAGTTACTTTTGCTTCTCTCGGGTTTTTTTTTTCTCTCCTATTTTTTTTTTCTGTCATATATTTTTCTCCTATTTTTCTATTTTTATTTTCCAAATAGGAAGTTCGAGATAGAATTTGGGTACTATAGGTGCGGCCATTACCATATATAACATAAAACTTCTCCCCCAATTCTGTTTAGTCGAGCTTCTCGATCTGTCATTATACCTCGAGAAGTAGAAAGAATAGCAATTCCCATTCCGCCCAAAACCTTAGGAATTCCTTGATAGTTGGCATAAATTCGTAAGCCAGGTCGGCTGATACGCTTTAAAAAGGTTCTAGTTCTATATATTCCCTTTCTAGTCTTTCTCCTTTGATGTCGCAAAGTTGAAACCAAGAAATATCTGTTACTTTCCTGATGTTTCCGAACACTTTCAATAAAACCCTCTCGTAGAAGTATTTTAACAATGTTTTCGGTAATATTTGTGGATACTACTCGAACAGTTCCTTTTTTATTCATGTCTGCGTTTCTTATAGAGGTTAGTAAATCAGCAATAGTGTCCTTGCCCATAAGACTCTAATTCTAGGTTCCTCCTAATTTTTCTATAATCAACATGTTTTCCCTTTTCTTTAAATTTAGGATTTTAAAGCATATACGTGAGACACAATCTACTAATTTTTTCTTTGATCTATATCTCGTCTACTAGTATTTATAATACTTCAGGAGCTAATGAAACTATTTTAGTATAATTCAATTCTCTTAATTCTTCGGCAACCGCGCCAAAAACTCGAGTTCCTTTTGGATTTCCTTTTTGATCAATGATAACTGCTGCATTGTCATCATAGCGTATTATTATACCGTCGTCGCCTTTGAATTCTTTACGTGTACGTACAATTACAGCTCGAATTACTTCGGATCTTTCTAGAGGCATTTGGGGCACTGCGTCTTTGATTACAGCAATAATAACATCACCAATACGAGCATATCGCTGATTACCAGCGGCTCCTATGACTCGAATACACATCAATTTTCGAGCTCCACTGTTATCTGCTACATTTAAAAGGGTCTGAGGTTGAATCATATTATTTTGATTTCCATTTGTTATTTCAATGCAAAAGGATGAAAGAAATATTGTCTTTCCAGAAAGAAAAACCAGGGGTTTTTTATCTTCAATACTCCTTTTTGGGGTTCTATATCTCTAATCGAAGAAATTGACTTCGTATGGGCATTTTACTGGCAGCTATAGAGATAGCTGCTCTAGCTACAGTTTCGGATACTCCGCTCATTTCATAAAGTATTCGACCTGGTTTAACAACGGCTACCCAATATTCGGGGGATCCCTTTCCCGAGCCCATACGTGTTTCTGTGGGTCTTATTGTAACCGGTTTGTCGGGAAATATACGCACCCATATTTTTCCACCACGACGTGCATATCGTGTCATTGCTCTTCGTCCTGCTTCTATCTGTCTCGCGGTGATCCAAGCGGGTTCAAGTACTTGAAGAGCATATCTACCAAAACAAATATGATTGCCTCGGCAGGATTTTCCATTCATTCTTCCTCTATGTTGTTTACGAAATCTAGTTCTTTTGGGGTTATAGTCGATGGTTCTTTCTTAGTTCCATCTCTACTACAAAACTGGACATGAGAGTTTCTTCTCATCCAGCTCCTCGCGAATGAAATGAGAAAGCGTGCGAATTTCATTTCTCTAATTCCATAATATTCCAAAATATTATAGATAGGTACACATCAATATATAATAGAAAAAGTTAGGTTTTTTTTGATTTTGACTTTCTTAAAAAAGAAAAATAAATATATAGTCAAGAAAGAAGATCTAGAATATATCAAAATTCAATATTTATATAAAATGTAATCCTTCCTTTTTTTGAATCTCCTTTTTTTTATTCTTATTGAATCGTGGTAAAGTATTCTAATCCAATAAGGATTTCGCGGGCGAATATTTACTCTTTCCTGTCTTATTTGTTAATTTAGAACCTTATCAAATAAAGCAATTTTTTTGGTTTGTTCCGCCATCCCACCCAATGAAGTGTTAGGATTCTTTCCAATAAAATCCTATGTAGTCATAGGTTTTGTCGTTCCCACAGCTTCTCCTTTAATGGTTAGGTTTGAATCCTGCAATGGAGCTTCCAAAAAATTTCTTTCCGAGTCAATTTTCTCAGTTTTATTAACCCGGCTGCTCTTTATTTATTGCTTTATATTTGTTGTTTCAAAAGTAAAGTTACGATTTCGAATTCTCTCTTTTTTTTTTTTTAGAATTTTATTATATTGATGCTTTATCACATTGCCTTTTTTTTATGATGTAATTCATAAACCATACACATGGGAATCCTATATCTTTCTTATTCTTCTTCCTTCTATCTATCATCCCTCCTTTTATCCAGATCCCTTTAGTTTTGCTTCACAGCCTAGAATCAGGTTTCTTTTGTAGAGAAAAAAATGCAGTTGCTACAACTATATGATAGATCTACTCATTTTTGATAGATGTATTTATTCACATAGTGACTGTTTCTTAGTTAGGATCTCGACAATACGAAGCAATAGGTTGGTTATTAGTTAATTTTCTATCATTACTAAGTTTTTTTCTATTTTTAGTAGGGTTCAGACAATTTTTTTTTCATTTTTGACCCTAAAGAAAAAACTAACGAGTCACACACTAAGCATAGCAATTATATTAAAAGATTTATTAATTTTCATTAAATCTTATAGAAAGAGGGATACTTTCTTCTTTTTTTTAGGGATTTTTGGAAAAACAAGGTTCTTGTCTTTTTTATTCTATCACTGGGCGGAATGGGAAGACATGGTTAGTTATTCTTCTTCTACGAATATCCAAATTTTGACACCTAATACTCCATAGATAGTTCGAATTGGATAGCAGCAATAATCAATTTTAGCGCGAATTGTTTGGAGGGGTAGTCTACCCTTTTTGATGCATTCGGCACGTGCAATTTCTTTTCCTGCTAGACGACCCGCAATTTGGATTTTTATTCCCTTTATATCCGCTTTTTTAGTTAATTCAATAGCTTTTTTCATTGCTTTTCGGAATGAAACTCTATTTTTTAATTGGAAAGCTATATATTCCGCAAGAATATTAGGTTGTCTATAAGGTTCTTTAACCTTTTCGATAGCAATATTAAGTCTCTGGTTTACAGAATTAACTTCCTTTTGGAGATCTTTCTCTAATTCTTCGATTGCTCCCTTTTTCTTTAATAAATTTGGGAATCCAATATGGATTATGACGTGGATTGTATCGATTTCTTTTTGAATTTCTATATGTGTAATTACTTCAGAACTTGAGTCTGATTCCATTTTTCTATTCGAGCCTTTTTTCCTATTCTTTTGTATATAGTTCTTGATACAATTCCGTATTTTTTTATCTTCCTGTAGACCTTCAGAATAATTTTTTGGTTGTGCGAACCAAAAGGAATGGTGATTTTGGGTTGTACCAAGTCTGAAACCGAGTGGATTTATTTTTTGTCCCATATTTTTCTATTATATTTCTTTTTTTTACTGGGAATCGAAATTTTAGATTGATCTAAAGATTATTTAGATTTCTTTACTATATTTAGTACAATTGTTATATTACACATCGTTTTTTTTATAGAATAACTACGTCCTCGAGCTCGAGGTCTGAATTTTTTCATAATAGTACTCCTACTGACTTCGGCTTTAGTGATGAATAAATTTGTTTTGTCGAAATCCCTATAATGAGTAGCATTTGCTGCTGCCGAATAAACCAACTTTAAGATGGGATACGATGCTCGATAAGGCATGAGATTCAGTATCATAACGGTTTCCTCGTAGTAACGCCAGCGAATCTCATCTAGAACTCTTTGTGCTTTGAAAACAGACATATGTATGCGTTTTTGTGCTTTGAAAACCCGTTCGAATTTAAGTAGACGATCGGTTGGAACTTTTCTTGCGAGTTTTCTCAGCCCCTTCTTCTTCTTTATCCTAGGGGTATACTTTACCAATTTGAAACTTGTCATAAATAAGGTTATTACCCGCCTATCTTTATTTTATTTGATTATTTGAATCCTATAAATTTTGTTTATTCTGAATCTTTCTATTCTGAATTCAATTAACGACGAGATTTAGTATCCTTTCTTGTACTTTCATAACTCGTGAAATGCCGAGTAGGCACGAATTCCCCCAATTTGCGACCTACCATAGGATTTGTTATGTAAATAGGTATATGTTCTTTTCCATTATGAATCGCGATTGTATGGCCAACCATTGCGGGTAGAATGCTAGATGCCCGGGACCACGTTACTATTATTTCTTTCTCCTCCTTCATATTGACCTTTTCGATTTTTGCCAATAAATGACGAGCTACAAAAGGATTCGTTTTTTTTCGTGTCACAGCTGATTACTCCTTTTTTTCATTTTAAAGAGTGGCATCCTATGTCCACTATCTCGATCGAGGTATGGAGGTCAGAATAAATAGAATAATAATGAATGGAAAAAAGAGAAAATCCTTTAGCTGGATAAGGGGCGGATGTAGCCAAGTGGATCAAGGCAGTGGATTGTGAATCCACCATGCGCGGGTTCAATTCCCGTCGTTCGCCCATCGCATTATTGCAATTTCCAAAAATGCAATTTTCCATATTCCTAGTTACGTATTTACTTACGGCGACGAAGAATAAAACTATCACTATATTTTTTCCTTTTCCTAGTTCTTCTTCCAAGCGCAGGATAACCCCAAGGGGTTGTGGGTTTTTTTCTACCAATGGGGGCTTTCCCTTCACCACCCCCATGGGGGTGGTCCACAGGGTTCATAACTACCCCTCTTACTACGGGGCGTTTACCTAGCCAACACTTAGATCCGGCTCTACCCAAACTTTTTTGGTTCACCCCAACATTACCCACTTGTCCGACTGTTGCTAAGCAGTTTTGGGATACCAAACGGACCTCCCCAGATGGTAATCTTAAAGTGGCCAATTTACCCTCTTTTGCAATCAGTTTCGCTACAGCACCTGCTGCTCTAGCTAATTGCCCACCCCTTCCACGTGTGATTTCTATGTTATGTATGGCCGTGCCTAAGGGCATATCGGTTGAAGTAGATTCTTCTTTTTTATCAAAAAACCCCTTCCCAAACTGTACAAGCTTCTTCCAAAGCATACGGCTTTCTAGATGTATATGACGATCTCTAGACAGATGGATCTTATATGAATCGTATGATGAAGTACCACATGAGTGGATATATAGAAAAGGAATCCAAATCCGCCGAATCGCTCATGTTATGATCTTCTACATCCTAGGTCTCCGCGTTCCGTCATCTGGCTTATGTTCTTCATGTAGCATTCAGATCGAATGACTCTATGAAATTACGTCGATACTTCCACATATTATGGGTAACGTAGGAGACATCCCTATTTTCACCCGGGGGTCTTAATTACCACTGCTTAGCTTTCAATTCGCCTCTGACCATCAAATTAAATGTGAATAACCCGTCCTCCTCTCTTTGAAACAAGGGGCGCTTCCGGTTCTGTGCGTGCTTCAAACAATTTTGTCTTCTCCATATTACCATATCTCTAGAGTCAATAATTTTCTATGAGGAACTACTGAACTCAATCACTTGCTGCCGTTACTCAACAGTTTTCTGTTGAGGTCTATCCCGTAGAGGTAGTCAAATTGGATCAGTGATCGATTTCTAGGTTTCGTCGTAAACCTAATTGGTTACTTCCAATTACGTAAATCAATAGTTCAAACCGCACTCAAAGGTAGGGCATTTCCCATTGATATAGGAACTTTTGTACCAGAAACAATAGTATCTCCAATTATAGCCCCTCTGGGATGTAAAATATATCTCTTCTCACCATCCCCATAGTGTATGAGACAAATGTATGCATTTCGATTAGGGTCGTATTCTATGGTTACGATTCTACCAGATATGTCTTTTTGATTCCGTCGAAAATCGATTTTACGGTATAGGCGCTTATGACCTCCCCCTCTATGCCTTGCGGTAATGATTCCTCTGGCATTACGACCTTTACCACAACGGTGCCGTCCATGGATCAATTTATTTCGTGGATTGGATTTCACTTGCCTGTCTACGGTTCCCTTGCGTGTGCTCGGGATAGGTGTTTTGTATAAATGTTTCGCCGTATTATTAAGTATTCTCCTTTAGTTCGTTTCTCTATCTAGAAGTGGAATAGAATAACCCGGTTGAAGGGTAATGATCATACGTCTGTAATGCATTGTATGTCCCAGAATAGGTCCCATTCTTCTACCCTTTCCGGGTAGTCGATGGCTATTCACAGCTACTACCTTAACACCAAAGAAGAGTTCGACCCAATGCTTTATTTCTGTCTTAGTGAATCCCGATTCGACATTAAAAGTATATTGATTCTTTCCCAATAAACGAAGACTCTTTTCTGTAAATACTGCGTATTTGATTCCATCCATAAATCGACTTTCCCTCCTATGCTCTGAGTTCCAGTATCGATAAGAATTCGAGTTCTTATTGTTCTTATGTTATGGTATGAATATACCATACCAATTCGTTATGTATGGATGATGGATGAGATTCCATGGATAGAGAGCCAGTTCCAATAGACCGTTCCCGTTCGCGTGCATCCAGCAGGAATTGAACCCGCAAATTTACCAATTATGAGTTGGGCGCTTTAACCATTCAGCCATGGATGCTTAACAGGGATCATCGTACATCGTAAATAACCAATTTTCATATAGAAAGACATATCATAGAAAAATGAAATCGAAAATATTCGGAGATGGCAAATATTCGGAGATGACTATGAAAAAACCTCTCCGGATCCTCGAATTGAAAGAGAGATTGAGAGGGATCAAGAATCCTAATTCTCGCTATTTGGAATGGATCCAATTCTATTGAGTCTGACCCATAGTGATCATTTCTCTTTAGCAAAGAATGACCTTGGTTATCAAAGGATTGAACAACCGAGATCCATTTACTTATGATACCTAGTTGACATTGCTAACAAGGATCTAATGAATTATGAGTTTAATAGATCCTCTTTAGCAGAAAGACGTATATTCCTTGCTCATTATCAGACAATCACTTATTCCCAAACCTCGTGTGGGGCTAATCGTTTTCATTTACCATCTCATGGAAAACCCTTTTCGTTCCGCTTAGCCCTATCGGGTATTTTAGTGATAGGTTCTATAGGAACTGGACGATCCTATTTGGTCAAATACCTAACGAAAAATTCCTATTTTCCTTTCATTAAGGTACGAGGGCTTCTTATTCCACAAGAACGAAAGCACCTTTTCATTCTTTCATATACTAGGGGTTTTTACTTGGAAAAGACAATGTTCCATACTAAAGGATTCGGGTCCATAACCACGAGTTCCAGTGCACTAGATCTTGTAGCACTTAGCAACGAGGCCCTATCCATTAGTATTCCACATAAGAAATCCATTATAGAAACTAATACAATTAGATTAGCTCTTCATAGACAAACTTGGGGTTTGCGAGCCAAGATAAGACCGGCTCGGGATCATGGGACCCTTTTCTATCAGATAGGAGGGGATCTTGTACAAAATAGACTTCTACTTCTAAGTAATAACCCCATAGATCCTATATCTATCTATATAAAGAGGCAATCGTGTCAGGAAGCGGCTTTTTCTTTGGCCAAACGTCGAACTTGGAACGAGCATGAAGAGATTAACGAGACTTCTTTCTCTTTTGAGTTTTTCTGGCGGACCGGTCGCGCAAGATCTTTGGTCTTCCCCCGGAACCGATGAAAAAGTGGGTCGCTTCTTATGGACTCGCTCAGAATGATTCTTCTCTATCTATAGTTCATGGCCTATTAGAAGTAGAAGGTGCTCTGGTGCAATCCTTACCGACAGAAAAAGATTGCAGTCGGGTTGATAATAATCGAGTGCCATTACTTCGTCGGTCCGAACCAAGGAATCCGTTAGAAATGTTTTGAAATGGATATTGTTCTCTCTTTGATTAGGGATGCTATATGAAAAGAAGTGGAGTTTGAAAAAGGGAACGGAATGGTCAAACCGGAACTGCTAGAGGAACGAATTTTCAATAGCATAACTTGGGCTCCTAGAATATGGGGCCCTTGGGACAATCTATTTGATTGCAGGGACAGGTACGCTGAATATGACTGGGGATTTTCCTATGGGTATTGGAGCGGGTCCAAGCAGATTAAAGAGGATGAGTTGTCAGAGACTGCTATTTATTCGAATTATTTCTGGTATATTTATCATAAAAAGGGGGAGGTGCAAGAGACTGATTCGGACTTCTTGCAGAGTGGAACAATGCAGTACCAGACACGAGATATATCTTTCAAAGAAGAAGGCTTTTTTCGAATAAGCCAATTGATTTGGGACCTTCGGATCCATTCTTTTTCCTATTCAAAGATCAGGCCTTTGTCTCTGTGTTTTCACGTCGAGAATTCTTTGCAGATGAAGATGAAGAGATGGCAAAGCGGCTTAGTACCAGTACCTGGAGAAAAAAGCCTCCTAAACATATGGCTAGCAACTGGTTCACCAGGAGTACGCAAGAAAGGCAAAAGCACTACGAATTAGTGATTTAGGAATGGGAATGGGCTAGAACCCTGGGTTCTTCCTTATATAATTAATGGTCTTTTCATTCTAATACTCTATCCGAGAGTTCTCAGTATTTAGCAAAGCTGTTCCTATCTAACGGAAGGCTCCTGGATCAAATGACAAAGACATTGTTTGTGGAGAAAGAGGTGGCTTTTCCCGGATGAAATGAAACATTTCATTTGTGTAACAGGAGAAAGATTTCCCACTCCTTAGCCGTAAAGATATGTGGCCATGAAAAAGGGAGGGGATTCAGTGGAACAGGATTGGCCGGGCGGTAGAGTCGTGGAAACACTTGTTGATTCCTATTTTGGACCCTAGCTCCATGGAACAATATGCTACTGCGGAAACATGGAAGAATTGCAATCTTAGATCAAAACACTATGTATGGGATGATATGAACTGCCTAAATAAGAATTCTTGAGCGTCGAATAACCTGAGTACTAACTACATCAAACAATTTGCATTAATGAAACTGTGTAAATCCACCGGATAATCAAAAATACGCATGTCTGATGAAATGGTTGTTGCTATCTGTTTCCATAACGAATCCTTGGTTTAACTGAATAAGTAAAGAAAATGGGCCCTTTCTCTTCGTCTCAGATCGATGGATCTTCTCGATTGGAAGATCTCCCATATGGATAATACACATTCCAGTTGACCGAGCCTAATGCTAATTGTTTTGTTCCGAAGCAAAGATATCCGCGGAGGCCGGTTCGTTCGTCCTATTCTGATATTCAGGACCAAGAGGTCCTGGATTCTCTTTCGGATAGGCCCTGAAAGGAGAAGAGAAGCTGAAATGCCAACGGACCTCTGTCTATTCTCTAATTCACCCGATCCGATAGTACCCGTTTTTGGAACGTCCAGTGCCAAAGTCACTGAATGGGTAAGTCACCAATCCAATCCCTTTGACAAATCGGGTGTCATATTAGATATCATATTCTATATATATAGAAATATCATAGAATAGACATATAGAATTTTTGGTTGGGAAATTCGAATGAATCATTGAGTGAAAAAGGAGCAAAGAATGACAAAAGATGAGACTCTACTAGTCTTCACTCTTGTGGTTTCCTCGGTTTCTATTTTCTTATTCGGGATCTTGCTTTTCATGGTTCTCATCTCTGCAACTCGCGATTTTCGCGAGAGAACCAAATCCAAGTTGGTGAAGATCATGATTTGGGCTGGCATAGTAGTTATTACCTTTGCAATTGCGGTTCGAATCTATCCGATCTTTATCTTTTTGCTCAAAGAACGAATAAAACCCCTTGTTGAAGCCCTTTATGATAAGCTTCCCTGGATCTGGGAAGTTTCTCTTTCACGGTATTGGGATCGTTTGATCGATTTCCTTGATCGCTACTTATGGGCGTGCGCTCAAAGGATACAAACAGGGATTCGCAAACAAAAAGGGGAATTCGTAGTCACTTTTTCCTGTCGCGTAAAAAAAAGGCTTTACGCGAGAGCAATAGAGGTTGGGATACATCTATCTCTTCTGAGCAACCTCTTTTGGATTCTTAAGACCACCCTTGCAGTAGGATACCGTCTGCTTTAGGTTCTTTATTATCTCCTTCGAGGGGTTTTTAGGATCATTCAGGCTATATTTAGTCTATTTTGGCTTTTACTGTCTACTTTTCTCAGGGAGATGGTTAAGGACCTCAGAAGATAGAGGAGAGCGCCAGGCGCAGATTTCCGGAATACTTCTACGGGGAATGCTCATTCAATGAGCATTCTCCGTATTATGCCTTGAAGAGGACTCGAACCTCCACGCTCTTTAGCACGAGATTTTGAGTCTCGCGTGTCTACCATTTCACCATCAAGGCATCTTGAAAGTGAATCGTATTCCATGAATATGATATCTATCGAATGTGATATATGGAATATATGACAAAGGTGGAGTCTTGGAGTATTTCGATCGATCGGTCATATACATATAGGCCTGAGTCAGACATCAAATAGCTTCGATTTGCATTATCCGTAGGACACCTTATATGTATCAAAATCGATATCAAAATCAAAAAGATGTACAATCCAATTTCTCGATTCAATAGAAGCCCAAAGAGGTGCATATGGTACCCAAATAAGGATAGGATAGATATGTCAAAAGCAGGTCTGATTACACCTATTCCTAATCCTAAATAGAATGTAAGGACGTAGGGATTTCTATGTAAACAGAGTATCCTATTTCCATAGGCTCGAATGACCCCTTCTCATAATAAGAATGTGCACGATCTGGTCCGGTATGGAATGAACTTATAATCTGATGATCGAGTCGATTCCATGATTATAAGTTCATAACCCTAGCACCCATTCCCATTTTGGGCGGAACAGATCTACTAATTCTTTTATTCCAGTTAGTAAGAGGGATCTTGAACTAAGAAATAGACCTAGCAGCTAAAAGAGGGTATCCTGAGCAATTGCAAGAATGGGGTTCATTGATATTCCTGGTATAGTAGATGCTATCACACATACAGTCATACTCAATTCGATGGAATTGTTTGATCTTAAAGGGGATCTTCTATAATTTCGCACATAAGGGGTTATTTCTTGGTTTCGTCCAGTCATTAATAACTTGATTATTTTTAGATAATAGTAGATAGAAAGAACGCTCGTAAGGAGTCCTATTGAAACCAAGAAATATAGGCCTGCTTGCCATCCACACCAGAATAGATAGAGTTTTCCGAAGAAACCTGCTAGTGGAGGAAGGCCTCCTAGGGATAAGAGACATAGGGCTAAAGAGAGAGCCAAAAAAGGATCTTTCGTGTATAATCCTGCATAATCTCGAATGTTATCAGTTCCGGTACGTAGACCAAATAATACAATGCAAGCAAAAGTTCCTAGATTCATGGAGATATAGAACAGCATATAAGTTATCATGCTTGCATATCCATCATTTGAGTCTCCAACAATTATTCCAATAATTACATATCCGATTTGCCCTATGGACGAATATGCAAGCATACGTTTCATGCTTGTTTGAGTAATAGCAAGGAGATTCCCCAATATCATGCTAAGAATAGCTAGGATTTCCAGAAGAAGATGCCATTCGTTTGATGAGAAATAAAAAGGAATATCGAGAATTCGCGTGGCTAAAGCTGAAGCAGCTACTTTCGAAGTAACAGAAAGAAAAGCAACGACTGGAGTGGGGGAGTCAGAGTCGAAAAGAGGATTCCTCGCTTCTTTCTCTCATGCAAAACCGTGCATGAGACTTTCATCTCGCACGGCTCCTAAGTGATAAAAGAAAGAAGAACTCGTCTTCTTTCTTTTTTGATTACCTTCCTCGCGTATGTATAAGACCGAATCCATTCTTTTTCGAAATGGATTTCGAAAAAGAACTACTAATCCTTAACTTTTCGAGGAATCCTTCATCAGTGGTTGTGAATGACTGACTTTTTCAATCCTTTCGACCTTGGTTCCGTAGGAGCAAGTCAGAAAGGTTGAGAAATAGAACCATCTGATTTGATTCGTTCCCAATAGCCATGAGATGATCATCTTAGGGTGATCCTTTTGTCAACGGATGCTCCTATTACACTCGTAGTCTCTGAAGGATGAGAACCCACTATGTAGCATTTACATCGATAATTCAAGCATTGTATACGTCATTAGTCCGATTCTTTGTAGGAACTACCCGTAATAACGAGCTTGCAAAATGGATCTGTTTATCATAAAGAGATTCGTTGTTCCTGACCCTGCTTCACCTTAATTGTTATTTGAACAAAAAGATCACATAAACTTTTGGTAAAAGTTCTGTCTTGGTCGGAGTGGGGATAGCATTTCTCTTCTGCATGTCTATGGAGTTTTGCAAAACCCAAACACCTCAGATAGAGGTAGGAATTTGTCGAACGAACCACACTCCTTCGTAGACGTCAGGAGTCCATTGATGAAAAGGGGCTGGGGAAAGCTTGAACCCAAGTCCTACAGTGATGAATATAAGCGCAATTGAAATTCCTGGGGAGTTATACATTTGTGTATTGATAAGACCATTCACAATTTCTTGAAGCTCGATCTCCCCCCCAGATGAACCATATAGCCAAGAGAAACCATGAACCAGAATAGAAGAGCTTGCCCCACCCATGAGTAAATATTTCATAGTAGCCTCATTAGACCGTAGATCTCTCTTGGTATATCCAGACAATAGGTAGGAACATAAACTGAAACATTCTGGAGCTACAAAGATAGTTATTAAATCGTTAGCACCACATAAAAACATTCCCCCTAGAGTAGCTGTTAATACGAATAACAGAAACTCTGTTATAGCCATTTCTGTACATTCAATGTACTCTACGGATAGAGGAATACATAAAGTTGAACATAATAAAATAAGAAATTGAAAGATTTCGTTGAAATTGTTCGTTTGGAAATTTCCCGAAAAGCTAATTATAGGTTCTTCTCTCCATCGGAACAATAGGGCCGTTATGCTTATTACTAAACTTGTTGAAGAGATGAAATAGAACCAAGGTCTATCTTTTTGATCAGAGGTTAAATCGATCATCAGAAGAAGAATTAGGCCAAAAATTAGGATACATTCTGGGAAAATGAAACTTCCATTGAAGAGAAGCAAATGAAACGCTTTCATAAAAATTCTCGTAGAATCGAGAATGAAGTTTTCATTCTGTACATGCCAGATCATGAATTAGTAACTGCAGCCAATCTCCGAAAAGTCCCGATTGTTTCGATTTTTGGAATGGGATATTTACGGAATCCCCATGAATAGGATCAAACCTTATTCCATGCTATTTCCATAAGATTCCTCTTTCTTATTCTTAAGCAAGCCCCCGAGAGGGCTTAGTTGATCATGATTTCTGTTTTCTCTTTTTTTTTCCTTTTTATTTGTTTCGAAAAAGATATCGTCCGATTCTCCTTCTATTGATTCTTTTCCGATCGAGATGTATGGATCCATGTGTCTACATACCTAGATTCTGTTCATGGATTAACGAAAATGTGCAAGAGCTCTATTTGCCTCTGCCATTCTATGAGTCGCTTCCTTTTTGCGTATGGCACCCCCACTCCCTTTGGCAGCATCTACTAATTCGGAACTTAATTTGAAAGCCATATTTCGACCCGGACGCTTTTGGGATGCTTCTAATAACCAACGAATGGCAAGTGCTCTTCCTTGTTTAGATCCTATTTCAATCGGAACTTTCCGCGTCGATCCTTTTTTATTACGTCTTGTTTTTACTCCTATATTGGGAGTTACTCTACGTATTGCTTGACGTAAAACCAATAGTGGATTTGTTTCTGTCTTTTGTTGAATCTTTTTCACGGCTCGATAGAGAATTTGATAAGCCAATGATTTTTTTCCGTCTTTCATAATACGGTTAACCACCATGTTAACTAATCGATTACGAAAAATTGGATCGGATTTTGCGGTTCTTTTTTCTGCAGTACCTCGACGTGACATGAGCGTGAAAGAGGTTCAAGAATCCGTTTTCTTTTTATAAGGGCTAAAAACGAATCACTTATTTTTTTGGCTTTTTGGCCCCATATTGTAGGGTGGATCTCGAAAGATAGGAAAGATCTCCCTCCAAGCCGTACATACGACTTTCATCGAATACGGCTTTCCACAGAATTCTATAGGGATCTATGAGATCGAGTATGGAATTCTGTTTACTCACTTTAAATTGAGTATCCGTTTCCCTCCTTTTCCCGCTAGGACCGGAAATCCTGTATTTTCCATATCCATACGATCGAGTCCTTAGGTTTCCGAAATAGTGTAATGGAAAAAGAAGTGCTTCGAATCATTGCTATTTGACTCGGACCTGTTCTGAAAAAGTCGAGGTATTTCGAATTGTTTGTTGACACGGACAAAGTAAGGGAAAACCTCTGAAAGAATTTCCATATTGACCTTGGACATATAAGAGTTCCGAATCGAATCTCTTTAGAAAGAAGATCTTTTGTCTCATGGTAGCCTGCTCCAGTCCCCTTACGAAACTTTCGTTATTGGGTTAGCCATACACTTCACATGTTTCTAGCGATTCACATGGCATCATCAAATGATACAAGTCTTGGATAAGAATCTACAACGCACTAGAACGCCCTTGTTGACGATTCTTTACTGCGACAGCATCTAGGGTTCCTCGAATAATGCGATATCTCACACCGGGTAAATCCTTAACCCTTCCTCCTCTTACTAATACTACAGAATGTTCTTGTAAATTATGGCCAATACCAGGTATATAAGCAGTGATTTCAAATCCAGAGGTTAATCGTACTCTGGCAACTTTACGTAAGGCAGAGTTGGGTTTTTTGGGGTTGATAGTGGAAAAGTCGACAGATAAGTCATCCTTACTGTCCCTCTACAGAACCGTACATGAGATTTTCACCTCATACGGCTCCTCGTTCAATTCTTTCGAAGGGATCCTTTTCCTCGTTCGAGAGTCTCCGCCCTTCTTCCACTCCGTCCCGAAGACTAACTAAGACCAATTGAGTCACGTTTTCATGTTCTAATTGAACACTTTCCATTTATGATTAAAGGAGAAGATTGTTCTTTTACCAAACATATGCGGATCAAATCACGTCTTATAATAAGAAGAAATCTTTCTCGGTATCAATCCCCTTGCCCCTCATTCTTTGAGAATCAGAAGGATCCTTTTCGAGTTTCCATTTCTTCATTTTGAATCTGGGCTCTTCTATCTTCGACTTATTTTTTTGGCTTTATTCTTTATTTATTTCATTTCGATTTTTCCCTCTTCCTCTATCCCTATCCTCTAGGTACAGCGTTTGCATCAATAGAGAACTTTTTCCTCTGTATGAATCGATATTATTCCATTCCAATTTCTTCCCGAAACTTCCCAAGAAAAATCCCGAATTGGATCCAAAATTGACGGGTTAATGTGAGCTTATCCATGCGGTTAGGCACTCTTCAAATAGGAATCCATTTTCTAACTGGCTTTCGTGCTTTGGTGAGTCGTCCGAGATCCTTTCGATGACCTATGTTGTGTTGAAGGGATATCTATATGATCCGATCGATTGCATAAGACCCGCGGTAGCAATAGAACGGGGAAAGTATACAGAAAAGACAGTTCTTTTCAATTTCGATTATCTATATATTAGTTCGTTTCTATTTCTAGATATCTATTTCTATATATCTATATATTAGTATTAATATCTATATATTAGTATTAGTTATCTATATATTAGTATTAGTTAGTAGTACTATTCTATTAGTTAGCGATCCCGGCTCTGTGAGTTCTTTCTTCCGTGATGAACTGTCGGCACCAGTCCTACATTTTTTCTCTGTGGACCGAGGAGAAAGGGGGCTCAGCAGGAAGAGGATTGTACCATGAGAGAAGCACAGAGGTCAACCCGCTTCAAATATGGAACATGGATTCTGGCAATGCAACGGAGTTGGGTCCTCATATCGATCCGAATGAATCAGTCTTTCTACAGAGGTCAATCTTTGCCTATTAGGCAAGAGGATAGCAAGTTCGAAATTCTGTCTCGGTAGGACATGGATTTCTATTACTATGAAATTCATAAATTAGTTAATGGGAGGGCTACCATTATCCTTTTTCTTGTATGTGTTCCTAAGAGAAGGAATTTGTCCATTTCATGTTTCGAGGTCTCAAAAAAAGGGCGTGGAAACAGATAGAAACTCTTGAATGGAAATTGAAAAGAAATGTAGCCCCAGTTCCTTCAGAAATGGTAAGATCTTTGGCGCAAGAAGAAGGGGCGATCCATATCATCTTGACTTGGTTCTGCTTCCCCTCTTTTTTTAAGAATACCGAGTCGGGTTCTTCTCCTACCAGTATCGAATAGAACATGCTGAACAAGATCTTCTTCATGGAAACCCACTCGATTTAGATCGGGAAAATCGTACAGATTTTATGAAACCATGTGCTATGGCTCGAATCCATAGTCAATCCTATTTTCGATAGGACCGGTTGACAATTGAATCCAATTTTTCCCATTATTTGACTGTTCATAATAGTGCGGAAAGAAAGCCCGGAGGAAGAGTGGCCTGGCCTTGCGTTTCTCGCCCCTTTGCCTTAGGATTCGTTAATTCTCTTTCTCGATGGGACGGGGAAGGGATATAACTCAGCGGTAGAGTGTCACCTTGACGTGGTGGAAGTCATCAGTTCGAGCCTGATTATCCCTAAACCTAATGTGAGTTTTTTCTATTTTGACTTACTCCCCCACCACGATCGAACGGGAATGGATAAGAGGCTTGTGGGATTGACGTGATAGGGTAGGGTTGGCTATACTGCTGGTGGCGAACTCCAGGCTAATAATCTGAAGCGCATGGATACAAGTTATCCTTGGAAGGAAAGACAATTCCGAATCCGCTTTGTCTACGAATAAGGAAGCTATAAGTAATGCAACTATGAATCTCATGGAGAGTTCGATCCTGGCTCAGGATGAACGCTGGCGGCATGCTTAACACATGCAAGTCGAACGGGAAGTGGTGTTTCCAGTGGCGAACGGGTGAGTAACGCGTAAGAACCTGCCCTTGGGAGGGGAACAACAACTGGAAACGGTTGCTAATACCCCGTAGGCTGAGGAGCAAAAGGAGAAATCCGCCCAAGGAGGGGCTCGCGTCTGATTAGCTAGTTGGTGAGGCAATAGCTTACCAAGGCGATGATCAGTAGCTGGTCCGAGAGGATGATCAGCCACACTGGGACTGAGACACGGCCCAGACTCCTACGGGAGGCAGCAGTGGGGAATTTTCCGCAATGGGCGAAAGCCTGACGGAGCAATGCCGCGTGGAGGTGGAAGGCCTACGGGTCGTCAACTTCTTTTCTCGGAGAAGAAACAATGACGGTATCTGAGGAATAAGCATCGGCTAACTCTGTGCCAGCAGCCGCGGTAAGACAGAGGATGCAAGCGTTATCCGGAATGATTGGGCGTAAAGCGTCTGTAGGTGGCTTTTCAAGTCCGCCGTCAAATCCCAGGGCTCAACCCTGGACAGGCGGTGGAAACTACCAAGCTGGAGTACGGTAGGGGCAGAGGGAATTTCCGGTGGAGCGGTGAAATGCATTGAGATCGGAAAGAACACCAACGGCGAAAGCACTCTGCTGGGCCGACACTGACACTGAGAGACGAAAGCTAGGGGAGCAAATGGGATTAGAGACCCCAGTAGTCCTAGCCGTAAACGATGGATACTAGGTGCTGTGCGACTCGACCCGTGCAGTGCTGTAGCTAACGCGTTAAGTATCCCGCCTGGGGAGTACGTTCGCAAGAATGAAACTCAAAGGAATTGACGGGGGCCCGCACAAGCGGTGGAGCATGTGGTTTAATTCGATGCAAAGCGAAGAACCTTACCAGGGCTTGACATGCCGCGAATCCTCTTGAAAGAGAGGGGTGCCCTCGGGAACGCGGACACAGGTGGTGCATGGCTGTCGTCAGCTCGTGCCGTAAGGTGTTGGGTTAAGTCTCGCAACGAGCGCAACCCTCGTGTTTAGTTGCCACTATGAGTTTGGAACCCTGAACAGACCGCCGGTGTTAAGCCGGAGGAAGGAGAGGATGAGGCCAAGTCATCATGCCCCTTATGCCCTGGGCGACACACGTGCTACAATGGGCGGGACAAAGGGTCGCGATCTCGCGAGGGTGAGCTAACTCCAAAAACCCGTCCTCAGTTCGGATTGCAGGCTGCAACTCGCCTGCATGAAGCAGGAATCGCTAGTAATCGCCGGTCAGCCATACGGCGGTGAATCCGTTCCCGGGCCTTGTACACACCGCCCGTCACACTATAGGAGCTGGCCAGGTTTGAAGTCATTACCCTTAACCGTAAGGAGGGGGATGCCTAAGGCTAGGCTTGCGACTGGAGTGAAGTCGTAACAAGGTAGCCGTACTGGAAGGTGCGGCTGGATCACCTCCTTTTCAGGGAGAGCTAATGCTTATGCTTATTGGGTATTTTGGTTTGACACTGCTTCACGCCCAAAAAGAAGGCAGCTACGTCTGAGCTAAACTTGGATATGGAAGTCTTCTTTCGTTTAGGGTGAAGTAAGACCAAGCTCATGAGCTTATTATCCTAGGTCGGAACAAATTAGTTGATAGTGATAGGATCCCCTTTTTGACGTCCCCATGTCCCCCCGTGTGGCGGCATGGGGATGTCAAAAGGAAAGGGATGGAGTTTTTCTCGCTTTTGGCGTAGCAGGCCTCCCTTTGGGAGGCCCGCGCGACGGGCTATTAGCTCAGTGGTAGAGCGCGCCCCTGATAATTGCGTCGTTGTGCCTGGGCTGTGAGGGCTCTCAGCCACATGGATAGTTCAATGTGCTCATCAGCGCCTGACCCGAAGATGTGGATCATCCAAGGCACATTAGCATGGCGTACTCCTCCTGTTTGAATCGGAGTTTGAAACCAAACAAACTTCTCCTCAGGAGGATAGATGGGGCGATTCAGGTGAGATCCCATGTAGATCGAACTTTCTATTCACTCGTGGGATCCGGGCGGTCCGGGGGGGGGCCACCGCGGCTCCTCTCTTCTCGAGAATCCATACATCCCTTATCAGTGTATGGAGAGCTATCTCTCGAGCACAGGTTGAGGTTCGTCCTCAATGGGAAAATGGAGCACCTAACAACGCATCTTCACAGACCAAGAACTACGAGATCACCCCTTTCATTCTGGGGTGACGGAGGGATCGTACCATTCGAGCCTTTTTTTCATGCTTTTCCCGGCGGTCTGGAGAAAGCAGTAATCAATAGGACTTCCCTAATCCTCCCTTCCTGAAAGGAAGAACGTGAAATTCTTTTTCCTTTCTGCAGGGACCAGGAGATTGGATCTAGCCATAAGAGGAATGCTTGGTATAAATAAGCCACTTCTTGGTCTTCGACCCCCTAAGTCACTACGAGCGCCCCCGATCAGTGCAATGGGATGTGGCTATTTATCTATCTCTTGACTCGAAATGGGAGCAGAGCAGGTTTGAAAAAGGATCTTAGAGTGTCTAGGGTTGGGCCAGGAGGGTCTCTTAACCCCTTCTTTTTTCTGCCCATCGGAGTTATTTCCCAAGGACTTGCCATGGTAAGGGGGAGAAGGGGGAAGAAGCACACTTGAAGAGCGCAGTACAACGGGGAGTTGTATGCTGCGTTCGGGAAGGATGAATCGCTCCCGAAAAGGAGTCTATTGATTCTCTCCCAATTGGTTGGATCGTAGGGGCGATGATTTACTTCACGGGCGAGGTCTCTGGTTCAAGTCCAGGATGGCCCAGCTGCGCCAGGGAAAAGAATAGAAGAAGCATCTGACTCTTTCATGCATACTCCACTTGGCTCGGGGGGGATATAGCTCAGTTGGTAGAGCTCCGCTCTTGCAATTGGGTCGTTGCGATTACGGGTTGGCTGTCTAATTGTCCAGGCGGTAATGATAGTATCTTGTACCTGAACCGGTGGCTCACTTTTTCTAAGTAATGGGGAAGAGGACTGAAACATGCCACTGAAAGACTCTACTGAGACAAAAAGATGGGCTGTCAAAAAGGTAGAGGAGGTAGGATGGGCAGTTGGTCAGATCTAGTATGGATCGTACATGGACGATAGTTGGAGTCGGCGGCTCTCCTAGGCTTCCCTCATCTGGGATCCCTGGGGAAGAGGATCAAGTTGGCCCTTGCGAATAGCTTGATGCACTATCTCCCTTCAACCCTTTGAGCGAAATGTGGCAAAAGGAAGGAAAATCCATGGACCGACCCCATTGTCTCCACCCCGTAGGAACTACGAGATCACCCCAAGGACGCCTTCGGCGTCCAGGGGTCACGGACCGACCATAGATCCTGTTCAATAAGTGGAACACATTAGCCGTCCGCTCTCCGGTTGGGCAGTAAGGGTCGGAGAAGGGCAATCACTCGTTCTTAAAACCAGCATTCTTAAGTTAAGATCAAAGAGTCGGGCGGAAAAAGGGGAGAGCTCCCCGTTCCTGGTTCTCCTGTAGCTGGATTCCCCGGAACCACAAGAATCCTTAGAATGGGATTCCAACTCAGCACCTTTTGTTTTGGGATTTTGAGAAGAGTTGCTCTTTGGAGAGCACAGTACGATGAAAGTTGTAAGCTGTGTTCGGGGGGGAGTTATTGCCTATCGTTGTCCTCTATGGTAGAACCCGTCGGGGAGGCCTGAGAGGCGGTGGTTTACCCTGTGGCGGATGTCAGCGGTTCGAGTCCGCTTATCTCCAGCCCGTGAACTTAGCGGATACTATGATAGCACCGAAGGTTGCCAATTCGTCAGTTCGATCTATGATTTCGCATTCATGGACGTTGATAAGATCCTTCCATTTAGTAGCACCTTAGGATGGCATAGCCTTAACGTTAATGGCGAGGTTCAAAAGAGGAAAGGCTTGCGGTGGATACCTAGGCACCCAGAGACGAGGAAGGGCGTAGCAAGCGACGAAATGCTTCGGGGAGTTGAAAATAAGCATAGATCCGGAGATTCCCAAATAGGTCAACCTTTTGAACTGCCTGCTGAATCCATGAGCAGGCAAGAGACAACCTGGCGAACTGAAACATCTTAGTAGCCAGAGGAAAAGAAAGCAAAAGCGATTCCCGTAGTAGCGGCGAGCGAAATGGGAGCAGCCTAAACCGTGAAAACGGGGTTGTGGGAGAGCAATACAAGCGTTGTGCTGCTAGGCGAAGCGGTTGAGTGCCGCACCCTAGATGGCTAAAGTCCAGTAGCCGAAAGCATCACTAGCTTACGCTCTGACCCGAGTAGCATGGGGCACGTGGAATCCCGTGTGAATCAGCAAGGACCACCTTGCAAGGCTAAATACTCCTGGGTGACCGATAGCGAAGTAGTACCGTGAGGGAAAGGTGAAAAGAACCCCCAGTGGGTAGTGAAATAGAACGTGAAACCGTGCTGAGCTCCCAAGCAGTGGGAGGGGAAAGTGATCTCTGACCGCGTGCCTGTTGAAGAATGAGCCGGCGACTCATAGGCAGTGGCTTGGTTAAGGGAATGGAACCCACCGGAGCCGTAGCGAAAGCGAGTCTTCATAGGGCGATTGTCACTGCTTATGGACCCGAACCTGGGTGATCTATCCATGACCAGGATGAAGCTTGGATGAAACTAAGCAGAGGTCCGAACCGACTGATGTTGAAGAATCAGCGGATGAGTTGTGGTTAGGGGTGAAATGCCACTCGAACCCAGAGCTAGCTGGTTCTCCCCGAAATGCGTTGAGGCGCAGCAGTTGACTGGACATCTAGGGGTAAAGCACTGTTTCGGTGCGGGCTGCGCGAGCGGTACCAAATCGAGGCAAACTCTGAATACTAGATATGACCCAAAAATAACAGGGGTCAAGGTCGGCCAGTGAGACGATGGGGGATAAGCTTCATCGTCGAGAGGGAAACAGCCCGGATCACCAGCTAAGGCCCCTAAATGACCGCTCAGTGATAAAGGAGGTGGGGGTGCAAAGACAGCCAGGAGGTTTGCCTAGAAGCAGCCACCCTTTAAAGAGTGCGTAATAGCTCACTGATCGAGCGCCCTTGCGCTGAAGATGAACGGGGCTAAGCGATCTGCCGAAGCTGTGGGATGTCAAAATGCATCGGTAGGGGAGCGTTCCGCCTTAGAGGGAAGCAAACGCGAAAGCGGGGGTCGACGAAGCGGAAGCGAGAATGTCGGCTTGAGTAACGAAAACATTGGTGAGAATCCAATGCCCCGAAAACCCAAGGTTTCCTCCGCAAGGTTCGTCCACGGAGGGTGAGTCAGGGCCTAAGATCAGGCCGAAAGGCGTAGTCGATGGACAACAGGTCAATATTCCTGTACTACCCCTTGTTGGTACGGAGGGACGGAGGAGGCTAGGTTAGCCGAAAGATGGTTATAGGTTTAAGGACACAAGGTGACCCTGCTTTTTCAGGGTAAGAAGGGGTAGAGAAAATGCCTCGAGCCGAGGTCCGAGTACCAAGCGCTGCAGCGCTGAAGTATGAGCCCCGTGGACTAGCCATTGCTTCTCCACGAGGCTCATACCAGGCGCTACGGCGCTGAAGTATGTAACCCATGCCATACTCCCAGGAAAAGCTCGAACGACCTTCAACAAAAGGGTACCTGTACCCGAAACCGACACAGGTGGGTAGGTAGAGAATACCTAGGGGCGCGAGACAACTCTCTCTAAGGAACTCGGCAAAATAGCCCCGTAACTTCGGGAGAAGGGGTGCCCCCTCGCAAAAGGGGGTCGCAGTGACCAGGCCCGGGCGACTGTTTACCAAAAACACAGGTCTCCGCAAAGTCGTAAGACCATGTATGGGGGCTGACGCCTGCCCAGTGCCGGAAGGTCAAGGAAGTTGGTGAACTGATGACAGGGAAGCCGGCGACCGAAGCCCCGGTGAACGGCGGCCGTAACTATAACGGTCCTAAGGTAGCGAAATTCCTTGTCGGGTAAGTTCCGACCCGCACGAAAGGCGTAACGATCTGGGCACTGTCTCGGAGAGAGGCTCGGTGAAATAGACATGTCTGTGAAGATGCGGACTACCTGCACCTGGACAGAAAGACCCTATGAAGCTTTACTGTTCCCTGGGATTGGCTTTGGGCTTTTCCTGCGCAGCTTAGGTGGAAGGCGAAGAAGGCCCCCTTCCGGGGGGGCCCGAGCCATCAGTGAGATACCACTCTGGAAGAGCTCGGATTCTAACCTTGTGTCAGACCCGCGGGCCAAGGGACAGTCTCAGGTAGACAGTTTCTATGGGGCGTAGGCCTCCCAAAAGGTAACGGAGGCGTGCAAAGGTTTCCTCGGGCCAGACGGACATTGGTCCTCGAGTGCAAAGGCAGAAGGGAGCTTGACTGCAAGACTCACCCGTCGAGCAGAGACGAAAGTCGGCCTTAGTGATCCGACGGTGCCGAGTGGAAGGGCCGTCGCTCAACGGATAAAAGTTACTCTAGGGATAACAGGCTGATCTTCCCCAAGAGTCCACATCGACGGGAAGGTTTGGCACCTCGATGTCGGCTCTTCGCCACCTGGAGCTGTAGGTGGTTCCAAGGGTTGGGCTGTTCGCCCATTAATGCGGTACGTGAGCTGGGTTCAGAACGTCGTGAGACAGTTCGGTCCATATCCGGTGTGGGCGTTAGAGCATTGAGAGGACCTTTCCCTAGTACGAGAGGACCGGGAAGGACGCACCTCTGGTGTACCAGTTATCGTGCCTACGGTAAACGCTGGGTAGCCAAGTGTGGAGAGGATAACTGCTGAAAGCATATAAGTAGTAAGCCCACCCCAAGATGAGTGCTCTCTCCTCCGACTTCCCTAGAGCCTCCGGTAGCACAGCCGAGACAGCGACGGGTTCTCCACCCATACGGGGATGGAGCGACAGAAGTATGGAAATAGGATAAGGTAGCGGCGAGACGAGCCGTTTAAATAGGTGTCAAGTGGAAGTGCAGTGATGTATGCAGCTGAGGCATCCTAACGAACGAACGATTTGAACCTTGTTCCTACACGACCTGATCAAATCGATCAGGCACTTGCCATCTATCTTCATTGTTCAACTCTTTGATGAAAAGAAAAGATGAAAAAACCAAAAAAAAGCTCTGCCCTTCCATCTCTTGGATAAATAGAGAGGGAGGGCAGAGTCCTTTGGTGTCCCTTCCAGTTAAGAATTGGGGCTTCACAATTACTAGCCAATATTTCTCTCATGCCTTTTCTCGTTCATGGTTCGATATTCTGGTGTCCTAGGCGTAGAGGAACCACACCAATCCATCCCGAATTTGGTGGTTAAACTCTACTGCGGTGACGATACTGTAGGGGAGGTCCTGCGGCAAAATAGCTCGATGCCAGAATGATAAAAAGCTTAACACCTCTTATTTGACTTTTTCACTATTTTGAAATACGAAAAAGATCCAAATCCAAAACACAAAGGTCGTCTTATTCAAAACCTCAATCATCCCCTCTCTCCCACTTCACACCTCAGAACGCACTGTTCTTATAGAGAGAAAGGCGCTTTCCCATCTTCTTAACCCGAAATGAAATGGCTGAGGAGAAGAAGGTTCCTTTTGGGGGGTATCCCCGGGAAGAGATCCAGTGGAGACGGGGTGGGCCTGTAGCTCAGAGGATTAGAGCACGTGGCTACGAACCACGGTGTCGGGGGTTCGAATCCCTCCTCGCCCACAGCCTTCCAAAGGGGGAAGGACCTTTACTTTCTCCCTGAGGGTAGGAAAATCATGATCGGAATAGCGGACGTAAAGCTATTGAACTTGGGTATGCTCTTTCCTTTTGTCGAAGTGGAATCGTAGAACAGAATGTGATACGATGAGATAGAATGCAATAGAAACAAGGATAGCGAACGGGTTACCTACTCCTAAGGGTCAAAGCAAGCCTTTTAATTCAATTCTTTATTCTTACATTAAAGAATGAATCAAATCTCCCCAAGTAGGATTCGAACCTACGACCAGTCAGTTAACAGCCGACCGCTCTACCACTGAGCTACTGAGGAACAAGGGGAGATTCGACCTCCTAGAGTTCAACTCCCGCTCTCAACCCGTGAACAATATGAGTCCGAAGCTTCTTTCGTAACTCCCGGAATTTCTTCGTAGTGGCTCCGTTCCATGCCTCATTTCATAGGGAAGCCCAAAGTGGCTCTATTTCATTCTATTTCACTTCCTAGCACTTCCTATCATTTAATATCCATCCCTTTGGTCTTATTGACATAAGAGATGTCATTTATAGTCTATCTCTTTCTATATATGGAAAGTCAAGAAATTCTCATCGAAACATCGAGAAATTGTGCATATAGAAAACTCTAAAGAAAGAAAAAAAGGAGACCCATGCCATGATTTTCAAATCTTTTCTACTTAAGTAGTCTAAAGTAGTCTAAGTTTCTCGATGAGGATAATTAATTCGGTCGTTGTGGTCGGACTCTATTATGGATTTCTGACCACATTCTCCATAGGTCCCTCTTAGATCTTCTTTCTCCAATCTTGGGTTAGGGAAGAAGGAGATATTCGCGACTACTGGCGGTTTCATTATGGGGCAGCTCATGATCTTCATATCGATCTATTATCCACCTCTGCATCTATTCTTTCTTAGCTAAACGGGTGGAAGATCCATCCAATTTGGTTATATCATGGACTCGAAAAACGGATCTGAATGTGACTGAAATGCACGATCTTCACAGGTATCACTTTTCACGATACCTAAACCTAAAAGGTGGAATAGCGATTTTCGAACCATTTCCTATAAGAGAATGGTTTCCATTACTTTGAGAAATGGATTCTATATCAAACTATAGCTATTGCATTAAAGAAGAAAAGAAACTAATAGAAGTCGAAGACGCGGAATGGTAGTGAATAGAGAAAAAGATTCTTCTGATTTTCTTGTTCCTGAAAATATTCGATCTATCTCCTAGACGCCGTAGAGAATTGAGAATTTTCATGTCTTTCAATTCTCGTACTCGTAATTGGAAAGTTACGGAAGGAGATCCATCATTTTGCAATGAAAACAACATAAAAAACTCTGGACAATTTCGAAATCAGACCAAGCGTCTTAATACATATGCAAAAAAATTCATTATTGGCCCACCATTGATTACAAGATTTAGCTTTTATGAATCGCTATTGGTTTGATACGAATAATGGCAGTCGTTTCAGTATGTTAAGGATACAGATGTATCCACAATTCATTTAGAGTTACTTAATAGCCTATTTCTTATACTATATCTCTATCCCGTGAAATTCTCGAGCCCAAAGATGGATGCATATGCTGTGTTTCATTTTGCTAAATGATATCAATTAAATGGTATATCAATTCTATAAATTGGATATAGCAATAAATAAATCAGCAAAATTCTTTTATTTTAGATAGAAGAAATGTTTCTTCTATCTAAAATAAAAGAATGTACCCTTCTATCCAAATCCAATTTGCATCGATAAAATAAATCCAAATTCCAGATTCCAGCAGTAGATGAATAATTGCAAATTTTTGTGTGTACGAGATTAGAATAACTTAAAAATAACTGACATAATTTTTTATTTTTCCTGATCAGAAAAATACATGAAAAAGAAAGGAGGTAGAAAAATTTGTTGATTTATGGTTAAAGAAGAAAAACAAGAAAACAGGGGTTCTGTTGAATTTCAAGTATTCAGTTTCACCAATAAGATACGGAGACTTGCTTCACATTTAGAATTACACAAAAAAGATTTTTCATCGGAAAGAGGTCTACGAAGACTTTTGGGAAAACGTCAACGTTTGCTGGCTTATTTGGCAAAGAAAAATAGAGTACGTTATAAGAAATTAATCAGTCAGTTGGATATTCGGGAGAAGTAATTTAATCGTTCGAATTTTTTTCTTATTTTATTAGTAGTCTTTATTTTATTAGTAGTCTTATAGTAGTCTTAGATTTTGCATTTTGATGAGCCTCGTTTTGAGGAATTCATGGAATAATCCATTTTCATGGAATAAAGAATAAGAACAAGGATACATAACATAAAAAAAAGAATAGATAAGACGATATTCGCCCTCCCCCTACATATTTGATTTCTTCTCCTATACAAAAACCAGCAAGACCTACTCCATTGATAATTCCATCAATGACACCTTTATCAAAAAAATGCGTTAGTTCAGCTAATCTTCTTATACCTAGGATAAAAACCCTAGTATAGAAAAAATCTATATAACCACGATTATATGACCAGCTGTATATCTTTTTTTTTACTTCATCCAAAAAGCTCTTTTTTGGATTCTTTTTTACAAGGGAATTTTGAAAATTCAAATTCTGAAAAAAAGAATAAGCAGATCCATAAAAGATATATGCTATGAATAGACCAAAAATTGCTAAACTTACAGAAGAAATTGCATTAGTGAGAAATTCATATGAATTTATGGAAGAATTTGAATTTTCCTGGAACAAGTTTATTGAAGGAGTTAGCCACTTTGATAATATGGTTAACTCCAATATTCTATTATCTTTTACTCCATTATCAAAAGGGATTCCTATGGATCCAATGAACAAAGTAAAAAGTAGTAATATAAGAAGAGGAAATAGCATAGTATTTCCCGTTTCATGAGGATAGACAAAAGTTTTTTTAGCCCCAAAGGGAGTACTAAAGGATCCTATCTTATTTCTTGTATTAGCAGGAATTTTGGGTATATTTTGTGAAAAAAAAGAAACTCCACTCTTCATTGTTGATAAAACAAAATCCCTATTGACTCCTTTGGATATACTTTTTCCCCATAAGGATATTGAATACAACGAACCTTCTTTAGTACTACTGTAATTTTGAAAATGAACACGCAAATACCCATCAAAAGTAAGTAAATATATCCGAAACATATAAAATGCAGTTAATCCTGCAGTAAAAGAGGCTATTATTCCAAAAAAGGGTGAATACAACCAACTATTACTAAGTATTTCATCTTTGGACCAGAAGCAAGCAAGAGGTGGAATACCACAAAGAGAAAGTGTACCACATAAAAAAGTAGTTCTTGTAATTGGAACGTATTTTCTTAAACCACCCATAAGAACCATATTCTGACTTTTATCTGGTGAATATCCAACAAGAGGTTCCATTGAATGAATAACGGATCCGGATCCTAAGAACAATAAAGCTTTCGAATAAGCATGAGTGATCAAATGGAATAAAGCAGCTTGATAAGAACCTATACCTAGAGCTAACATCATATAACCCAATTGAGACATTGTAGAATAGGCTAAGCTTCTTTTAATATCTCTCTGAGCAAGAGCTAAAGTGGCTCCTAAGAAGAGTGTTATTGTACCTACTAAAGAAATGAAACTCATTAGCAAGGGTAGGGATATGAAAAGAGGAAGAAGTCTAGCTAGAAGAAAAATCCCCGCAGCAACCATAGTTGCTGCGTGTATAAGAGCCGAAATGGGAGTGGGTCCTTCCATAGCATCAGGTAACCATACGTGAAGAGGAAATTGTGCAGATTTTGCAACTGCACCAAGGAATAATAAAAAAGCACACAAAGTAGTAAGTAAGGAATTAATCCCATTATTAGGAATCCAGTTATTAGCTATTTTGAACAAATCCCGAAACTCCAAACTACCCGTTATCCAAAAAAAACCTAAAATTCCTAATAACAGACCAAAATCCCCTACACGATTAGTTACAAAAGCTTTTTGACAAGCACTCGCTGCAATTGGCCGCGTAAACCAAAAGCCTATCAATAAATAGGAACACATTCCGACAAGTTCCCAAAAAAAATAAATTTGTATCAAATTGGAACTAGTAACCAATCCCAACATGGAAGTATTAAAAAAACTTATATAAACAAAAAATCTCAAATATCCTTCATCGTGAGACATATAATCGTCACTATAAATAAGAACTAAGATTCCTACAGTAGTAATTAGTATTAACATAATAGACGTAAGGGGGTCGACCAAGTATCCAAATTCTAAGGAAAAATCATTATTGATGGTCCAAGACCATAGATATTGATAGATAGAACTTCCATTTATTTGTTGAATAGACAGGTGAAGTGAGAATACCATAGCTATACTTAAGAGTAAAATACTAGGAAAAGCCCATATGCGACGAAGATTTTTTGTTGCTGTGGGAATAAGAAAAAGTCCAAATCCCATTGACATAATAACTGGAAGTGGGAGAAGAGGAATTACCCAGGCATATTGATATGTATGTTCCATAAGAAAAGAAATAGCAATTTTTAGTTTAAATTTATAGTTCAATTTTTCTATAAAATTGTTTCCGATTCACCAAACCTATTCTTATCTCTTTCTAAAGGAATTCAAAAAACAAAATAAGAAAAAGCAAAAATACTGGAATTCTGGATTTTTCAAATTTCTCTCATTAAAATATTCCAAAATTCAGAATGGGTTTAGTTACTGAAATTCAAAAAGTGAATCAAAGAATTTCAGTATCTAGTTATTAGTTAAAAAAAAAATATTTATTAAAATACAAAAAAAGATTGAATAATTTTACTTTCTAATCATTTTTGTATTTCTTTCTGTTAAAATAAAAGAGCTCTGTTGTTTCGTAATTGATTGATTGAATTCCAAAGAAAACCTATATTTATAGGAAATTCTCGAATATTGCTTATTTCATATAAAAGGAAATCCTAATGACTAGAATTCTCTAAGTTTTAGAATGTCTTGTTTAAGAGACTAAGTATTTTTTTTATTGGAATTCAATTATGCAATAGCTTTCTGAACTTAATTAACTATTTGAATTGAATTTTACCTTCCTTCTTTTTATGTCCCCCTCTTATATGAGGGCTTATCCCCCATACCATATATTTATATATGGAGTATATTTGATATATAAATTGATTTAAATAGAAAATCTTAAAAAACTCTTGTCTTATCTTATCCACATTAGACAAAATGAACTAAAGAAGAATTTAGAATTTAAGTATCTTTCAGTATCATTTAAGTATCTTTCAGTATCTAAGTATAAATACTAAGAAAAAACAGAAAGAAGGATTGATTTGCGGCAATAGATGTCTTTCACATACAACTAGAAAAAAGTAATTCCCTTTTTGAATGGCAGTTCCAAAAAAACGTACTTCGATGTCAAAAAAGCGTATTCGTAAAAATCTTTGGAAAAAAAAGACTTATTTTTCCATAGTACAATCTTATTCTTTAGCAAAATCAAGATCATTTTCTAGCGGCAACGAGCATCCAAAACCAAAAGGTTTTTCTGGGCAACAAGCAAACAAATAATAAGATTTTGAAATAATCTGAATTGAACTATCCAAAAGAAATTCCAATTATTTAATATCAATGAATAATTCGGATTAATTAATAAATGTACTTTTATGTGTCGAATTCCTCGGTACAATATTCTTAGAACGAATCCCTCCATTATCATTATATAGAACAAAAGTTTTTGGTATATTGTGTCCTCAGTATTCTTTTCCTATCAAAGAACTTTTTTTTTATTTATAATAGAATCCTCATAAAAACGAGGATTCTATTATAAAAAGTAGACTATTCTTGCAATAGGACTTACAACCTCTACCTAATCTTATCCAAAATTCCCATATAAATGGGTTTAGGACTGGTACATCATATTAATAAGAGTGTAAAGGCTTTCATTCTATAAATTTTTCTAAAATACAAAATTCATTTCATTGTAGTTAATGATGAACTTCTAATGTTCCTAAATTCTATGGCCTCTCCCAGTCTCGACGATTCACGATAAAATAACTATTATTCTTTTAAGTTAACTATTATTTAAAATTAGCCGCCATGGTGAAATTGGTAGACACGCTGCTCTTAGGAAGCAGTGCTCAAGCATCTCGGTTCGAATCCGAGTGGCGGCATTCTCGAAAAAGAATACAATAAATTAGAAAATGGATTCAATTCGAAATTTCCAATTTTGTAATGGGACCTTATCGTTATGCTATTTGCAACTTTAGAACATATACTAACTCATATCTCTTTCTCAACCATTTCAATTGTGATTACGATTCATTTGATAACCTTATTAGTTCGTGAACTTAGGGGATTACGTGATTCGTCAGAAAAAGGAATGATAGCTACTTTTTTCTCTATAACAGGATTTTTAGTCTCTCGTTGGGTTTCTTCGGGACATTTTCCATTAAGTAATTTATATGAGTCATTGATCTTCCTTTCATGGACTCTGTATATTCTTCATACTATTCCTAAGATACAGAACTCGAAAAATGATTTAAGCACAATAACTACGCCAAGTACTATTTTAACGCAAGGCTTTGCCACGTCGGGTCTTTTAACTGAAATGCATCAATCCACAATACTAGTACCTGCTCTACAATCTCAGTGGTTAATGATGCATGTCAGTATGATGTTACTAAGCTATGCAACTCTTTTGTGCGGATCCTTATTATCCGCCGCTCTTCTAATCATTAGATTTCGAAATTCTTTCGATTTCTTTTCACTAAAGAAAAATGTTTTAAGAAAAACATTTTTCTTTAGTGAGATTGAATATTTATATGCAAAAAGAAGTGCTTTAAAAAACACCTCTTTTCCCGTATTTCCAAATTATTACAAATATCAATTAACTGAGCGTTTGGATTCTTGGAGTTATCGTGTCATTAGTCTAGGGTTTACTCTTTTAACCGTGGGTATTCTTTGTGGAGCAGTATGGGCTAATGAGGCATGGGGATCCTATTGGAATTGGGATCCTAAGGAAACTTGGGCATTTATTACCTGGACCATATTTGCAATATATTTACATAGTAGAACAAATCCAAATTGGAAGGGTACGAATTCCGCACTTGTAGCTTCGATAGGATTTCTTATAATTTGGATCTGCTATTTTGGTATCAATCTGTTAGGAATAGGTTTACATAGTTACGGTTCATTTACATTACCATCTAAATAATTACATAACATAAAACCTGAAGGTTTTTTCCTTTTTTGTTTGATTTGAGAACCCTTTGAAAAGACGTTCAAGGGGTTCTCAAAAATTCGAGATAGATCTAATTAGACTTTTTTACTTTTTTCTGAATTTTTTATTTTTCCACTCTGGAATATAGAGCGGACTGGTTAAAAAAAGAAAATCCTATTTAGTATAATAATTGGATAATAGAACCTCTACCCTATCAACGGATAGAGAGAGAACAAAATCTGGATAAATACCAATTCCTATTACTGGTAAAAAGATACAGATTAAAAGAAAGAGTTCCCGTGGTCCAGAATCTACAAAATTTTTGTTTGGAACATGAAATAGCTTGTATCCATAGAACATCTGGCGTAACATAGATAATAAATAAATAGGAGTTAATATCATTCCTATTGCCATTACAAAAGTAATTAGCATTTTTGGCATTAACATAAATTTAGGACTAGTAATTAGTCCAAAAAATACTACTAATTCTGCAACAAAACCGCTCATTCCCGGCAAGGCAAGAGAAGCCATTGAAAAGCTACTAAACATGGTAAAAATTTTTGGCATTGGGATAGATATTCCCCCTAGTTCTTCGAGATAAACAAGACGCATTCTATCACAAGCCGTTCCCGCCAAGAAAAAAAGTGTAGCACCAATAAATCCATGAGATAATATTTGTAAAATAGCTCCATTTAGTCCAATGTTGGTTATGGAACCAATTCCTATAATTATGAAACCCATGTGAGATACGGAGGAGTAGGCTATTCTTTTTTTGAAATTTCGTTGACCAAGAGAAGTTGAAGCTGCATAGATTATTTGCACCGCTCCTATTATTACCAACCAGGGGGAAAATAGATAATGAGCATGCGGTAACAATTCCATATTGACCCGAATCAATCCGTATGCTCCCATCTTTAATAGAATTCCGGCTAAAAGCATACATGTACTGTAATGCGCTTCCCCATGGGTATCTGGTAACCACGTATGTAAAGGTATAATCGGCAATTTGACAGCATAAGCAATAAGGAAGCCAAAATACAGTAGTATTTCTAATGTTGTAGGGTATGATTGATTAATCAATCTTTCTAAATCTAATCCGGGTTCATTGGAACCATATAATCCCATACCCAGAACTCCAATTAAGAAAAAAATGGAACCGCCTGCAGTATACAAAATAAACTTGGTAGCTGAATACAGACGCCTCTTTCCCCCCCACATGGATAAAAGTAAGTAAACAGGAATTAATTCTAACTCCCACATGATAAAAAAAAGTAAAAGGTCTCGTGAAGAAAATAATCCTATTTGACCGCTATACATTGCTAGCATCAGGAAATAGAATAATTGCGAATTCCGAGTAACCGGCCAAGCCGCTAAAGTAGCTAAAGTAGTGATAAATCCTGTCAATAAAATAGATCCTAATGAAAGTCCATCGATTCCCAATCTCCAGTGGAAATCGAAAACATCTATCCATTTAGAATCCTCCTTTAATTGGATTAAGGGATCCTCCAATTGGAAATGATAACAGAATGCATAAGTCATTATAAGGAATTCTAATAAACAAATAGCTATAGTATACCACCTAACGATTTTATTTCCTTTATGAGGTAAAAAGAAAATTAATGAACCTGCAAATATCGGCAAAACAACAAGTATTGTTAACCAAGGAAAATAACTCATGATAAAGTAATAAAGACAAGATACGTTTTGACCAGAAAAGCCCATGCTCGATTATTTCGAGCACAGGCTTCTTCGGTAAAGAGGAATCAGACGATTCAAGTGGAGTTTTTTGTAACGTATCAATAAGATAGAGCCATGCTGCGGGTTGTTTCAGGCCCTAAATAAACGCGGACACTTAAAAAATCCGTTGGGCAGGCGGATTCGCATCTCTTACAACCCACACAATCTTCGGTTCTCGGCGCGGAAGCAATTTGCTTGGCTTTACATCCATCCCAAGGTATCATTTCTAATACATCTGTTGGGCAAGCTCGTACACATTGAGTGCATCCTATACATGTATCATAAATTTTTACAGAATGTGACATTGGATCTCTAAATTTTCCTTTTCAACATAAAAATTTTCGATCTGGTAAAAATGAAATTAGTACTATATAAATTAGATGTATTGTAGACACCAGACGAAGCAATGGTTTATCCAAACTTTAACAAATAATGCAATATATTTCGTAATCTGTTTGTGAGAAAGCGTGAAAAGAGCCAAGAGACTTGAATTTAAGGCTTCAACAGTCATAATTATACGAATTCTACATACTAATTCGAATTAGCCAATAAATTGGCTATCATCTTTTCAATATAAATTATTGCAATATTCAAATTGCAATATCAATGAATTGCAAAAATGCAATATTCAATAAGTAAAAAACAATACTCTGAAATAACCTACTCAAAAAATGGATATTATTAAACACTAATAAGAAAATAAGATGATTTCATCTTAATGTTTCTTATTATTATATATGCGCCTTTGTTTAGAGGATTCTATGTCTAATTATTCAAAAAATTGGATTGATTGATACGAGTTGATTTCCTGTTACGATGGATGGAAGAAAGAATGGATAGTCCAATAGCTGCTTCAGCAGCCGCAAGGGCTATAACAAAAATTGCGAAAATGTCTCCTTTTAATTGGCGACTATCAAATAGATCAGAAAATGTTACGAGATTTAGATTAATTGAATTCAGTATAAGTTCAAGACATATTAGAGCTCTAACCATGTTTCGGCTTGTGATCAATCCATAGATACCAATCGAAAATAAATAGACACTCAAAAAAAGTACATGCTCAAACATCATTAACTAACTCCTTATCAATCTCGATTCATTTCAATATGAGGACAAGAAAGAATTGAACCGATTCAATTAATTAGAATAGAACAATTACACAACAAAAGAGAAAAGAAGGTATTTGTTGTGTTGGCAGTAGATGGGTTTTACTAAATCAAAATTGTGATTCTTTAGTTATTTATTTTATATTTGAAATTCTAAGAATTTTGACTCATTCTAAGTATTTCTTATTGTCGAGCCATAGTAATTGCACCTATTAAAGAAACTAGAAGAATTAGGGAAATGAGTTCAAACGGAAGATAAAAATCGGTTGCTAAATGAATCCCAATTTGTTGAACGTTATTTATGAGACCCTGTTCTACTATTTGGTTTGATCTTGTAGTCCAAAGAATTCCATACCACGACGTATCTGGGATAGTAGTCATTAGTGAAAAAGGAATAGTTATACAAAGGAGTAAAGTAAACCCATCTCCAATCGTCCAATAATTCTTATCTTTAGACCACTCTGAGCCGTTTACAAACATTACAGCAAATATGATCAAGACATTTATGGCTCCCACATAAATAAGAAGTTGTGCGACAGCTACAAAGTAGGAATTTAATAAAAAATAGAATAAGGATATACAAACAAGAACTAATCCCAGCGAAAAGGCAGAATAAATTGGGTTGGTAAGTAATACTACTCCTAGACCTCCTAGTAGAAGAACAAATCCCCCAAATAGCACAAGAATCTCATGTATTGGTCCAGGTAAATCCATTATGGATAAGAAGAAATTTCTAGTATAAAATTTTTCATGAACTGACTAAAACTAAAAGATTCAAGGAAGGAAAAAGGTATTAGGATATTTTTTTGTATATGCATATAAGTTGTTAAGCAGTAGTTATTCTTTTTTCGTTAGAGTTAGTCAAAATGGATTTTTCTAATAAAAAAATCCTAATACCTAGTAATCCGTAATCGTTCTTGAATTCCAAGATTTTTCTTCGTCTATTTTACTTTGAGGCGAATTCCTAATTGTTTGAATTGTGTAATCTCCCATTATGGAGATTGGTAACCGACTCAAAGCAATTTGATTGTAATTCAATTCATGACGATCATAAGTAGAAAGTTCATATTCTTCAGTCATTGATAAACAATTTGTGGGACAGTATTCAACACAGTTACCACAAAATATACAAACTCCGAAATCAATACTATAATTAAGCAATTGTTTTCTTTTAATATCCTTTTCAAATTTCCAATCCACAAGGGGTAGATCTATCGGGCATACGCGAACACATACTTCACAAGCAATGCATTTATCAAATTCAAAGTGTATTCGCCCCCGGAAACGCTCCGATGTAATTGATTTTTCATAAGGGTAGTGAATCGTTATAGGTAAACGATTTGTGTGGGATAAGGTAATTATTAAACCTTGACCAATGTATCTTGCGGCGCGTATTGTTTGTTGACCATAACTAATGAACCCAGTTAGCATAGGGAACATATTCTAAATCTATATATGAAAAGGGTATGTTTCTTTCTCTTGTTTGAGAGAACTTTTGTGTTGAAAATATTCTTACTGTTATTGTATTCTTATTTATAGTGAAACTAGTTGGGAAGAAGTTGTTAATAAGAGATTGCCCAGAGAAATAGGTAAAAGAAATTTCCATCCAAGATTTAATAACTGATCCATTCTCATCCTGGGTAAAGTCCATCTTATTGTGATAGAAATGAAGAGAAATAAATAAGCTTTAGTTAATGTAATAAAGATACCTATTACCATTTCCAAAATTCCAATTATTTTATTCATTTGGAAAAATCCAAAAAAGGATATATAGGGAATAGAGAAATTCCACCCGCCTAAGTATAGAACAGTTACAAATAAAGAGGAAACTAATAAATTTAGGTAAGAAACAAGATAAAATAAACCATATTTAATACCAGAATATTCGGTTTGATAACCTGCTACTAATTCTTCTTCTGCTTCTGGTAAATCAAAGGGTAATCTTTCACATTCTGCTAAAGAAGAAATTAGAAAAACTAGAAAACCTATAGGCTGACGCCAAAGATTCCATCCAAAAAAACCATATTTGGACTGTGCTTCAACTATATCAACTGTACTTGAACTATTAGATAATCATAGTCGATGATAACATCACAGTTCCCACCGCTATTCCAAAACCGTACATGAAACCTTAGCTTCATACGGCTCCTCTATGATCAGAAAAAAGGAAAGGATTGTTTCGTTTCGGTATTATCCCCTGGGCATAGATAGAATTAGGTAAGATAAAATTGATTGGAAAGCCCAAAATTAGACCAAAGCAATTACGTCTGCTAGAATAACAAAAAAGCGCTTCCGAATTGATCTCATCCTTTATATAATATAATTTTTCTTTGTTCGGTAATAACTTAATATTGGAATAAATCACTCATTATAGCAATTAATAAATGGAAAGAATTTGGCATTAGTTCATGAGGAATTCTGTATGAATAGGGATAAAGGAAGGAAAGAATAAATAAAGATCCTTTTTTGTATTGTATTCCATATCTTTTGTCCTATTCTTCTTTCCCTGGGAGGGGTATACTTAAAAAAAAAGAATAAAGGGTTAATTCGTTCTTGATAGCCATTTCCTTAACAAGTGAATGGGAACATACTCTAGACCGGAATCTGAAGAAAGTACTGCTTGATCATTTCCACCAATTTCAAGTCCTTATTATGATTCCTTTTATGAGGAAAAATGTCTAATGATTTAGATTCTCTCATTACTAATCCTGTATGTACTTTAGTGTTCCTAATCCCTCACTAACTTTTGATGGATTGCCTTATGGTTATAAGTTTAAATTATAGTAATAACTCAAAATATTCTAGTAATGGAATTCCATATCGCGAATCCTTTATTCTTGCCCGCTTCAAGATATGATGACTAATTAAACAATCTCAACCTTGGGGTAAAGAGTTTACACTGCTTATGTTTACTTGAACTTTTTTCTTGTACGTAGGAAATGAGATTTTTTATTTTTACTACAAATTAATAAGCTGTTTTGTTTCACTCATATAGCTATCGAGTTTAACTTACCAACGCGAATACAGAATAAGCAAAGGAAGATAAGCATTCAATGTATTTTAGAGGAAAAAGATCCTATTTTAACGAATCACACGTAGAGATATTGCTAGTACACAAAAAGTTAATGGTATTTCATAACTAATAGATTGAGCAGCCGCTCGTAGACCGCCTGAAAAAGAATATTTATTATTTGAGCTATATCCTGCCATGAGAAGACCAATAGGAGCAATACTTGAAATCGCAATCCATAAAAAAACACCAATACTAAGATCAGCTAAAACAAAATGATATCCCAAAGGGATAACTAAAAAACTTAATAAAATGGATATGACTGCTATAGAGGGACCAATGCTAAATAAAGGAATCTCTCCTCGGGATGGGAGGATATCCTCTTTTAAAAGTAGTTTAGTTCCATCTGCTATAGCTTGAAGCAGTCCCAGGGGGCCAGCATATTCAGGACCAATACGTTGTTGTATCGATGCGGATATTTCTCTTTCTAACCACACAATTACGAGTACTTCTATTGTGATTCCCAGTAGGAGGGCCAAAATGGGTAGAATCCATATAAGTCCGTAGATTTCTTTTAATAATTCCGATTTCGAAAAAGAATTGATAGTTTCTACCTCTACCCTATCTATTATCATTTCAACGATCAACTTCCCCCATAATGATATCTATACTACCTAATATTGTCATGATATCAGCCAATTTCATTTTTTTAACTAGCTGAGGAAGAATTTGCAAATTAATAAAACCCGGTGGACGAATTTTCCATCTCCAGGGGAAAAGACTATCATCTCCTACCAGATAAATTCCTAATTCGCCTTTTGGAGCTTCTACTCTTACATAAAGCTCTTGCTTTGATAATTCAAAATTGGGCGAAGGTTTTTTACCAAGAAATCGATATTCAAAATCATTCCATTCGGGATTCTTTGCTTTCTTAAAGCGTCGGGCTTCTAAATTCTCATAAGGTCCTCCAGGAATTTTCTCTACAGCCTGTTGAATAATTTTTATGGATTCCCTCATTTCACCGACTCGTACTAAATAGCGAGCTAACGAATCTCCTTCTTTTTGCCATTGGACTTTCCAATCGAATTGATTGTAAGACTCATAAGGATCGATTTTACGAAGATCCCATTGTATTCCAGAAGCTCGTAACATTGGTCCCGATAAGCCCCAATTTACAGCTTCTTCTCCGCTAATAAAACCGACTCCTTCAACTCGTTCTAAAAAAATAGGATTCTGTGTAATAAGTTGTTGATATTCAACAACTCCTTGTAAAAAATAATCACAGAAATCTAAACATTTATCCATCCATCCATAAGGGAGATCGGCAGCTACCCCTCCGATGCGAAAGTAATTATGCATCATTCGCATACCTGTAGCAGCTTCAAATAGATCATATATCAATTCTCTCTCTCTAAAAATGTAGAAAAAAGGAGTCTGTGCCCCGAGATCCGCCATAAAAGGTCCAAGCCATAACAAATGAGAAGCTATACGGCTCAATTCTAACATAATTACTCTAATATAGCTGGCTCTTTGGGGTATTTGAATATTCTCCAAGAATTCTGGTGCATTTACCGTTATTGCTTCTGTAAACATAGTAGCTAAATAATCCCATCGTGTTACATAAGGCAAGTATTGTATAATACTTCTGTTTTCTGCAATTTTTTCCATTCCTCTGTGTAAATACCCTAATATGGGTTCGCAATCAATAACATCTTCACCATCGAGAGTAACAATCAGTCGAAGAACACCATGCATTGATGGGTGTTGAGGACCCATATTCACTATCATGAGATCTTTTCTTTTAAGCGATAGACTCATATCCTTGTTCTTATTCTTTATTCCATGAAAATGGATTATTCCATGAATTCCTCAAAACGAGGCTCATCAAAATGCAAAATCTAAGACTACTATAAGACTACTAATAAAATAAAGACTACTAATAAAATAAGAAAAAAATTCGAACGATTAAATTACTTCTCCCGAATATCCAACTGACTGATTAATTTCTTATAACGTACTCTATTTTTCTTTGCCAAATAAGCCAGCAAACGTTGACGTTTTCCCAAAAGTCTTCGTAGACCTCTTTCCGATGAAAAATCTTTTTTGTGTAATTCTAAATGTGAAGCAAGTCTCCGTATCTTATTGGTGAAACTGAATACTTGAAATTCAACAGAACCCCTGTTTTCTTGTTTTTCTTCTTTAACCATAAATCAACAAATTTTTCTACCTCCTTTCTTTTTCATGTATTTTTCTGATCAGGAAAAATAAAAAATTATGTCAGTTATTTTTAAGTTATTCTAATCTCGTACACACAAAAATTTGCAATTATTCATCTACTGCTGGAATCTGGAATTTGGATTTATTTTATCGATGCAAATTGGATTTGGATAGAAGGGTACATTCTTTTATTTTAGATAGAAGAAACATTTCTTCTATCTAAAATAAAAGAATTTTGCTGATTTATTTATTGCTATATCCAATTTATAGAATTGATATACCATTTAATTGATATCATTTAGCAAAATGAAACACAGCATATGCATCCATCTTTGGGCTCGAGAATTTCACGGGATAGAGATATAGTATAAGAAATAGGCTATTAAGTAACTCTAAATGAATTGTGGATACATCTGTATCCTTAACATACTGAAACGACTGCCATTATTCGTATCAAACCAATAGCGATTCATAAAAGCTAAATCTTGTAATCAATGGTGGGCCAATAATGAATTTTTTTGCATATGTATTAAGACGCTTGGTCTGATTTCGAAATTGTCCAGAGTTTTTTATGTTGTTTTCATTGCAAAATGATGGATCTCCTTCCGTAACTTTCCAATTACGAGTACGAGAATTGAAAGACATGAAAATTCTCAATTCTCTACGGCGTCTAGGAGATAGATCGAATATTTTCAGGAACAAGAAAATCAGAAGAATCTTTTTCTCTATTCACTACCATTCCGCGTCTTCGACTTCTATTAGTTTCTTTTCTTCTTTAATGCAATAGCTATAGTTTGATATAGAATCCATTTCTCAAAGTAATGGAAACCATTCTCTTATAGGAAATGGTTCGAAAATCGCTATTCCACCTTTTAGGTTTAGGTATCGTGAAAAGTGATACCTGTGAAGATCGTGCATTTCAGTCACATTCAGATCCGTTTTTCGAGTCCATGATATAACCAAATTGGATGGATCTTCCACCCGTTTAGCTAAGAAAGAATAGATGCAGAGGTGGATAATAGATCGATATGAAGATCATGAGCTGCCCCATAATGAAACCGCCAGTAGTCGCGAATATCTCCTTCTTCCCTAACCCAAGATTGGAGAAAGAAGATCTAAGAGGGACCTATGGAGAATGTGGTCAGAAATCCATAATAGAGTCCGACCACAACGACCGAATTAATTATCCTCATCGAGAAACTTAGACTACTTTAGACTACTTAAGTAGAAAAGATTTGAAAATCATGGCATGGGTCTCCTTTTTTTCTTTCTTTAGAGTTTTCTATATGCACAATTTCTCGATGTTTCGATGAGAATTTCTTGACTTTCCATATATAGAAAGAGATAGACTATAAATGACATCTCTTATGTCAATAAGACCAAAGGGATGGATATTAAATGATAGGAAGTGCTAGGAAGTGAAATAGAATGAAATAGAGCCACTTTGGGCTTCCCTATGAAATGAGGCATGGAACGGAGCCACTACGAAGAAATTCCGGGAGTTACGAAAGAAGCTTCGGACTCATATTGTTCACGGGTTGAGAGCGGGAGTTGAACTCTAGGAGGTCGAATCTCCCCTTGTTCCTCAGTAGCTCAGTGGTAGAGCGGTCGGCTGTTAACTGACTGGTCGTAGGTTCGAATCCTACTTGGGGAGATTTGATTCATTCTTTAATGTAAGAATAAAGAATTGAATTAAAAGGCTTGCTTTGACCCTTAGGAGTAGGTAACCCGTTCGCTATCCTTGTTTCTATTGCATTCTATCTCATCGTATCACATTCTGTTCTACGATTCCACTTCGACAAAAGGAAAGAGCATACCCAAGTTCAATAGCTTTACGTCCGCTATTCCGATCATGATTTTCCTACCCTCAGGGAGAAAGTAAAGGTCCTTCCCCCTTTGGAAGGCTGTGGGCGAGGAGGGATTCGAACCCCCGACACCGTGGTTCGTAGCCACGTGCTCTAATCCTCTGAGCTACAGGCCCACCCCGTCTCCACTGGATCTCTTCCCGGGGATACCCCCCAAAAGGAACCTTCTTCTCCTCAGCCATTTCATTTCGGGTTAAGAAGATGGGAAAGCGCCTTTCTCTCTATAAGAACAGTGCGTTCTGAGGTGTGAAGTGGGAGAGAGGGGATGATTGAGGTTTTGAATAAGACGACCTTTGTGTTTTGGATTTGGATCTTTTTCGTATTTCAAAATAGTGAAAAAGTCAAATAAGAGGTGTTAAGCTTTTTATCATTCTGGCATCGAGCTATTTTGCCGCAGGACCTCCCCTACAGTATCGTCACCGCAGTAGAGTTTAACCACCAAATTCGGGATGGATTGGTGTGGTTCCTCTACGCCTAGGACACCAGAATATCGAACCATGAACGAGAAAAGGCATGAGAGAAATATTGGCTAGTAATTGTGAAGCCCCAATTCTTAACTGGAAGGGACACCAAAGGACTCTGCCCTCCCTCTCTATTTATCCAAGAGATGGAAGGGCAGAGCTTTTTTTTGGTTTTTTCATCTTTTCTTTTCATCAAAGAGTTGAACAATGAAGATAGATGGCAAGTGCCTGATCGATTTGATCAGGTCGTGTAGGAACAAGGTTCAAATCGTTCGTTCGTTAGGATGCCTCAGCTGCATACATCACTGCACTTCCACTTGACACCTATTTAAACGGCTCGTCTCGCCGCTACCTTATCCTATTTCCATACTTCTGTCGCTCCATCCCCGTATGGGTGGAGAACCCGTCGCTGTCTCGGCTGTGCTACCGGAGGCTCTAGGGAAGTCGGAGGAGAGAGCACTCATCTTGGGGTGGGCTTACTACTTATATGCTTTCAGCAGTTATCCTCTCCACACTTGGCTACCCAGCGTTTACCGTAGGCACGATAACTGGTACACCAGAGGTGCGTCCTTCCCGGTCCTCTCGTACTAGGGAAAGGTCCTCTCAATGCTCTAACGCCCACACCGGATATGGACCGAACTGTCTCACGACGTTCTGAACCCAGCTCACGTACCGCATTAATGGGCGAACAGCCCAACCCTTGGAACCACCTACAGCTCCAGGTGGCGAAGAGCCGACATCGAGGTGCCAAACCTTCCCGTCGATGTGGACTCTTGGGGAAGATCAGCCTGTTATCCCTAGAGTAACTTTTATCCGTTGAGCGACGGCCCTTCCACTCGGCACCGTCGGATCACTAAGGCCGACTTTCGTCTCTGCTCGACGGGTGAGTCTTGCAGTCAAGCTCCCTTCTGCCTTTGCACTCGAGGACCAATGTCCGTCTGGCCCGAGGAAACCTTTGCACGCCTCCGTTACCTTTTGGGAGGCCTACGCCCCATAGAAACTGTCTACCTGAGACTGTCCCTTGGCCCGCGGGTCTGACACAAGGTTAGAATCCGAGCTCTTCCAGAGTGGTATCTCACTGATGGCTCGGGCCCCCCCGGAAGGGGGCCTTCTTCGCCTTCCACCTAAGCTGCGCAGGAAAAGCCCAAAGCCAATCCCAGGGAACAGTAAAGCTTCATAGGGTCTTTCTGTCCAGGTGCAGGTAGTCCGCATCTTCACAGACATGTCTATTTCACCGAGCCTCTCTCCGAGACAGTGCCCAGATCGTTACGCCTTTCGTGCGGGTCGGAACTTACCCGACAAGGAATTTCGCTACCTTAGGACCGTTATAGTTACGGCCGCCGTTCACCGGGGCTTCGGTCGCCGGCTTCCCTGTCATCAGTTCACCAACTTCCTTGACCTTCCGGCACTGGGCAGGCGTCAGCCCCCATACATGGTCTTACGACTTTGCGGAGACCTGTGTTTTTGGTAAACAGTCGCCCGGGCCTGGTCACTGCGACCCCCTTTTGCGAGGGGGCACCCCTTCTCCCGAAGTTACGGGGCTATTTTGCCGAGTTCCTTAGAGAGAGTTGTCTCGCGCCCCTAGGTATTCTCTACCTACCCACCTGTGTCGGTTTCGGGTACAGGTACCCTTTTGTTGAAGGTCGTTCGAGCTTTTCCTGGGAGTATGGCATGGGTTACATACTTCAGCGCCGTAGCGCCTGGTATGAGCCTCGTGGAGAAGCAATGGCTAGTCCACGGGGCTCATACTTCAGCGCTGCAGCGCTTGGTACTCGGACCTCGGCTCGAGGCATTTTCTCTACCCCTTCTTACCCTGAAAAAGCAGGGTCACCTTGTGTCCTTAAACCTATAACCATCTTTCGGCTAACCTAGCCTCCTCCGTCCCTCCGTACCAACAAGGGGTAGTACAGGAATATTGACCTGTTGTCCATCGACTACGCCTTTCGGCCTGATCTTAGGCCCTGACTCACCCTCCGTGGACGAACCTTGCGGAGGAAACCTTGGGTTTTCGGGGCATTGGATTCTCACCAATGTTTTCGTTACTCAAGCCGACATTCTCGCTTCCGCTTCGTCGACCCCCGCTTTCGCGTTTGCTTCCCTCTAAGGCGGAACGCTCCCCTACCGATGCATTTTGACATCCCACAGCTTCGGCAGATCGCTTAGCCCCGTTCATCTTCAGCGCAAGGGCGCTCGATCAGTGAGCTATTACGCACTCTTTAAAGGGTGGCTGCTTCTAGGCAAACCTCCTGGCTGTCTTTGCACCCCCACCTCCTTTATCACTGAGCGGTCATTTAGGGGCCTTAGCTGGTGATCCGGGCTGTTTCCCTCTCGACGATGAAGCTTATCCCCCATCGTCTCACTGGCCGACCTTGACCCCTGTTATTTTTGGGTCATATCTAGTATTCAGAGTTTGCCTCGATTTGGTACCGCTCGCGCAGCCCGCACCGAAACAGTGCTTTACCCCTAGATGTCCAGTCAACTGCTGCGCCTCAACGCATTTCGGGGAGAACCAGCTAGCTCTGGGTTCGAGTGGCATTTCACCCCTAACCACAACTCATCCGCTGATTCTTCAACATCAGTCGGTTCGGACCTCTGCTTAGTTTCATCCAAGCTTCATCCTGGTCATGGATAGATCACCCAGGTTCGGGTCCATAAGCAGTGACAATCGCCCTATGAAGACTCGCTTTCGCTACGGCTCCGGTGGGTTCCATTCCCTTAACCAAGCCACTGCCTATGAGTCGCCGGCTCATTCTTCAACAGGCACGCGGTCAGAGATCACTTTCCCCTCCCACTGCTTGGGAGCTCAGCACGGTTTCACGTTCTATTTCACTACCCACTGGGGGTTCTTTTCACCTTTCCCTCACGGTACTACTTCGCTATCGGTCACCCAGGAGTATTTAGCCTTGCAAGGTGGTCCTTGCTGATTCACACGGGATTCCACGTGCCCCATGCTACTCGGGTCAGAGCGTAAGCTAGTGATGCTTTCGGCTACTGGACTTTAGCCATCTAGGGTGCGGCACTCAACCGCTTCGCCTAGCAGCACAACGCTTGTATTGCTCTCCCACAACCCCGTTTTCACGGTTTAGGCTGCTCCCATTTCGCTCGCCGCTACTACGGGAATCGCTTTTGCTTTCTTTTCCTCTGGCTACTAAGATGTTTCAGTTCGCCAGGTTGTCTCTTGCCTGCTCATGGATTCAGCAGGCAGTTCAAAAGGTTGACCTATTTGGGAATCTCCGGATCTATGCTTATTTTCAACTCCCCGAAGCATTTCGTCGCTTGCTACGCCCTTCCTCGTCTCTGGGTGCCTAGGTATCCACCGCAAGCCTTTCCTCTTTTGAACCTCGCCATTAACGTTAAGGCTATGCCATCCTAAGGTGCTACTAAATGGAAGGATCTTATCAACGTCCATGAATGCGAAATCATAGATCGAACTGACGAATTGGCAACCTTCGGTGCTATCATAGTATCCGCTAAGTTCACGGGCTGGAGATAAGCGGACTCGAACCGCTGACATCCGCCACAGGGTAAACCACCGCCTCTCAGGCCTCCCCGACGGGTTCTACCATAGAGGACAACGATAGGCAATAACTCCCCCCCGAACACAGCTTACAACTTTCATCGTACTGTGCTCTCCAAAGAGCAACTCTTCTCAAAATCCCAAAACAAAAGGTGCTGAGTTGGAATCCCATTCTAAGGATTCTTGTGGTTCCGGGGAATCCAGCTACAGGAGAACCAGGAACGGGGAGCTCTCCCCTTTTTCCGCCCGACTCTTTGATCTTAACTTAAGAATGCTGGTTTTAAGAACGAGTGATTGCCCTTCTCCGACCCTTACTGCCCAACCGGAGAGCGGACGGCTAATGTGTTCCACTTATTGAACAGGATCTATGGTCGGTCCGTGACCCCTGGACGCCGAAGGCGTCCTTGGGGTGATCTCGTAGTTCCTACGGGGTGGAGACAATGGGGTCGGTCCATGGATTTTCCTTCCTTTTGCCACATTTCGCTCAAAGGGTTGAAGGGAGATAGTGCATCAAGCTATTCGCAAGGGCCAACTTGATCCTCTTCCCCAGGGATCCCAGATGAGGGAAGCCTAGGAGAGCCGCCGACTCCAACTATCGTCCATGTACGATCCATACTAGATCTGACCAACTGCCCATCCTACCTCCTCTACCTTTTTGACAGCCCATCTTTTTGTCTCAGTAGAGTCTTTCAGTGGCATGTTTCAGTCCTCTTCCCCATTACTTAGAAAAAGTGAGCCACCGGTTCAGGTACAAGATACTATCATTACCGCCTGGACAATTAGACAGCCAACCCGTAATCGCAACGACCCAATTGCAAGAGCGGAGCTCTACCAACTGAGCTATATCCCCCCCGAGCCAAGTGGAGTATGCATGAAAGAGTCAGATGCTTCTTCTATTCTTTTCCCTGGCGCAGCTGGGCCATCCTGGACTTGAACCAGAGACCTCGCCCGTGAAGTAAATCATCGCCCCTACGATCCAACCAATTGGGAGAGAATCAATAGACTCCTTTTCGGGAGCGATTCATCCTTCCCGAACGCAGCATACAACTCCCCGTTGTACTGCGCTCTTCAAGTGTGCTTCTTCCCCCTTCTCCCCCTTACCATGGCAAGTCCTTGGGAAATAACTCCGATGGGCAGAAAAAAGAAGGGGTTAAGAGACCCTCCTGGCCCAACCCTAGACACTCTAAGATCCTTTTTCAAACCTGCTCTGCTCCCATTTCGAGTCAAGAGATAGATAAATAGCCACATCCCATTGCACTGATCGGGGGCGCTCGTAGTGACTTAGGGGGTCGAAGACCAAGAAGTGGCTTATTTATACCAAGCATTCCTCTTATGGCTAGATCCAATCTCCTGGTCCCTGCAGAAAGGAAAAAGAATTTCACGTTCTTCCTTTCAGGAAGGGAGGATTAGGGAAGTCCTATTGATTACTGCTTTCTCCAGACCGCCGGGAAAAGCATGAAAAAAAGGCTCGAATGGTACGATCCCTCCGTCACCCCAGAATGAAAGGGGTGATCTCGTAGTTCTTGGTCTGTGAAGATGCGTTGTTAGGTGCTCCATTTTCCCATTGAGGACGAACCTCAACCTGTGCTCGAGAGATAGCTCTCCATACACTGATAAGGGATGTATGGATTCTCGAGAAGAGAGGAGCCGCGGTGGCCCCCCCCCGGACCGCCCGGATCCCACGAGTGAATAGAAAGTTCGATCTACATGGGATCTCACCTGAATCGCCCCATCTATCCTCCTGAGGAGAAGTTTGTTTGGTTTCAAACTCCGATTCAAACAGGAGGAGTACGCCATGCTAATGTGCCTTGGATGATCCACATCTTCGGGTCAGGCGCTGATGAGCACATTGAACTATCCATGTGGCTGAGAGCCCTCACAGCCCAGGCACAACGACGCAATTATCAGGGGCGCGCTCTACCACTGAGCTAATAGCCCGTCGCGCGGGCCTCCCAAAGGGAGGCCTGCTACGCCAAAAGCGAGAAAAACTCCATCCCTTTCCTTTTGACATCCCCATGCCGCCACACGGGGGGACATGGGGACGTCAAAAAGGGGATCCTATCACTATCAACTAATTTGTTCCGACCTAGGATAATAAGCTCATGAGCTTGGTCTTACTTCACCCTAAACGAAAGAAGACTTCCATATCCAAGTTTAGCTCAGACGTAGCTGCCTTCTTTTTGGGCGTGAAGCAGTGTCAAACCAAAATACCCAATAAGCATAAGCATTAGCTCTCCCTGAAAAGGAGGTGATCCAGCCGCACCTTCCAGTACGGCTACCTTGTTACGACTTCACTCCAGTCGCAAGCCTAGCCTTAGGCATCCCCCTCCTTACGGTTAAGGGTAATGACTTCAAACCTGGCCAGCTCCTATAGTGTGACGGGCGGTGTGTACAAGGCCCGGGAACGGATTCACCGCCGTATGGCTGACCGGCGATTACTAGCGATTCCTGCTTCATGCAGGCGAGTTGCAGCCTGCAATCCGAACTGAGGACGGGTTTTTGGAGTTAGCTCACCCTCGCGAGATCGCGACCCTTTGTCCCGCCCATTGTAGCACGTGTGTCGCCCAGGGCATAAGGGGCATGATGACTTGGCCTCATCCTCTCCTTCCTCCGGCTTAACACCGGCGGTCTGTTCAGGGTTCCAAACTCATAGTGGCAACTAAACACGAGGGTTGCGCTCGTTGCGAGACTTAACCCAACACCTTACGGCACGAGCTGACGACAGCCATGCACCACCTGTGTCCGCGTTCCCGAGGGCACCCCTCTCTTTCAAGAGGATTCGCGGCATGTCAAGCCCTGGTAAGGTTCTTCGCTTTGCATCGAATTAAACCACATGCTCCACCGCTTGTGCGGGCCCCCGTCAATTCCTTTGAGTTTCATTCTTGCGAACGTACTCCCCAGGCGGGATACTTAACGCGTTAGCTACAGCACTGCACGGGTCGAGTCGCACAGCACCTAGTATCCATCGTTTACGGCTAGGACTACTGGGGTCTCTAATCCCATTTGCTCCCCTAGCTTTCGTCTCTCAGTGTCAGTGTCGGCCCAGCAGAGTGCTTTCGCCGTTGGTGTTCTTTCCGATCTCAATGCATTTCACCGCTCCACCGGAAATTCCCTCTGCCCCTACCGTACTCCAGCTTGGTAGTTTCCACCGCCTGTCCAGGGTTGAGCCCTGGGATTTGACGGCGGACTTGAAAAGCCACCTACAGACGCTTTACGCCCAATCATTCCGGATAACGCTTGCATCCTCTGTCTTACCGCGGCTGCTGGCACAGAGTTAGCCGATGCTTATTCCTCAGATACCGTCATTGTTTCTTCTCCGAGAAAAGAAGTTGACGACCCGTAGGCCTTCCACCTCCACGCGGCATTGCTCCGTCAGGCTTTCGCCCATTGCGGAAAATTCCCCACTGCTGCCTCCCGTAGGAGTCTGGGCCGTGTCTCAGTCCCAGTGTGGCTGATCATCCTCTCGGACCAGCTACTGATCATCGCCTTGGTAAGCTATTGCCTCACCAACTAGCTAATCAGACGCGAGCCCCTCCTTGGGCGGATTTCTCCTTTTGCTCCTCAGCCTACGGGGTATTAGCAACCGTTTCCAGTTGTTGTTCCCCTCCCAAGGGCAGGTTCTTACGCGTTACTCACCCGTTCGCCACTGGAAACACCACTTCCCGTTCGACTTGCATGTGTTAAGCATGCCGCCAGCGTTCATCCTGAGCCAGGATCGAACTCTCCATGAGATTCATAGTTGCATTACTTATAGCTTCCTTATTCGTAGACAAAGCGGATTCGGAATTGTCTTTCCTTCCAAGGATAACTTGTATCCATGCGCTTCAGATTATTAGCCTGGAGTTCGCCACCAGCAGTATAGCCAACCCTACCCTATCACGTCAATCCCACAAGCCTCTTATCCATTCCCGTTCGATCGTGGTGGGGGAGTAAGTCAAAATAGAAAAAACTCACATTAGGTTTAGGGATAATCAGGCTCGAACTGATGACTTCCACCACGTCAAGGTGACACTCTACCGCTGAGTTATATCCCTTCCCCGTCCCATCGAGAAAGAGAATTAACGAATCCTAAGGCAAAGGGGCGAGAAACGCAAGGCCAGGCCACTCTTCCTCCGGGCTTTCTTTCCGCACTATTATGAACAGTCAAATAATGGGAAAAATTGGATTCAATTGTCAACCGGTCCTATCGAAAATAGGATTGACTATGGATTCGAGCCATAGCACATGGTTTCATAAAATCTGTACGATTTTCCCGATCTAAATCGAGTGGGTTTCCATGAAGAAGATCTTGTTCAGCATGTTCTATTCGATACTGGTAGGAGAAGAACCCGACTCGGTATTCTTAAAAAAAGAGGGGAAGCAGAACCAAGTCAAGATGATATGGATCGCCCCTTCTTCTTGCGCCAAAGATCTTACCATTTCTGAAGGAACTGGGGCTACATTTCTTTTCAATTTCCATTCAAGAGTTTCTATCTGTTTCCACGCCCTTTTTTTGAGACCTCGAAACATGAAATGGACAAATTCCTTCTCTTAGGAACACATACAAGAAAAAGGATAATGGTAGCCCTCCCATTAACTAATTTATGAATTTCATAGTAATAGAAATCCATGTCCTACCGAGACAGAATTTCGAACTTGCTATCCTCTTGCCTAATAGGCAAAGATTGACCTCTGTAGAAAGACTGATTCATTCGGATCGATATGAGGACCCAACTCCGTTGCATTGCCAGAATCCATGTTCCATATTTGAAGCGGGTTGACCTCTGTGCTTCTCTCATGGTACAATCCTCTTCCTGCTGAGCCCCCTTTCTCCTCGGTCCACAGAGAAAAAATGTAGGACTGGTGCCGACAGTTCATCACGGAAGAAAGAACTCACAGAGCCGGGATCGCTAACTAATAGAATAGTACTACTAACTAATACTAATATATAGATAACTAATACTAATATATAGATATTAATACTAATATATAGATATATAGAAATAGATATCTAGAAATAGAAACGAACTAATATATAGATAATCGAAATTGAAAAGAACTGTCTTTTCTGTATACTTTCCCCGTTCTATTGCTACCGCGGGTCTTATGCAATCGATCGGATCATATAGATATCCCTTCAACACAACATAGGTCATCGAAAGGATCTCGGACGACTCACCAAAGCACGAAAGCCAGTTAGAAAATGGATTCCTATTTGAAGAGTGCCTAACCGCATGGATAAGCTCACATTAACCCGTCAATTTTGGATCCAATTCGGGATTTTTCTTGGGAAGTTTCGGGAAGAAATTGGAATGGAATAATATCGATTCATACAGAGGAAAAAGTTCTCTATTGATGCAAACGCTGTACCTAGAGGATAGGGATAGAGGAAGAGGGAAAAATCGAAATGAAATAAATAAAGAATAAAGCCAAAAAAATAAGTCGAAGATAGAAGAGCCCAGATTCAAAATGAAGAAATGGAAACTCGAAAAGGATCCTTCTGATTCTCAAAGAATGAGGGGCAAGGGGATTGATACCGAGAAAGATTTCTTCTTATTATAAGACGTGATTTGATCCGCATATGTTTGGTAAAAGAACAATCTTCTCCTTTAATCATAAATGGAAAGTGTTCAATTAGAACATGAAAACGTGACTCAATTGGTCTTAGTTAGTCTTCGGGACGGAGTGGAAGAAGGGCGGAGACTCTCGAACGAGGAAAAGGATCCCTTCGAAAGAATTGAACGAGGAGCCGTATGAGGTGAAAATCTCATGTACGGTTCTGTAGAGGGACAGTAAGGATGACTTATCTGTCGACTTTTCCACTATCAACCCCAAAAAACCCAACTCTGCCTTACGTAAAGTTGCCAGAGTACGATTAACCTCTGGATTTGAAATCACTGCTTATATACCTGGTATTGGCCATAATTTACAAGAACATTCTGTAGTATTAGTAAGAGGAGGAAGGGTTAAGGATTTACCCGGTGTGAGATATCGCATTATTCGAGGAACCCTAGATGCTGTCGCAGTAAAGAATCGTCAACAAGGGCGTTCTAGTGCGTTGTAGATTCTTATCCAAGACTTGTATCATTTGATGATGCCATGTGAATCGCTAGAAACATGTGAAGTGTATGGCTAACCCAATAACGAAAGTTTCGTAAGGGGACTGGAGCAGGCTACCATGAGACAAAAGATCTTCTTTCTAAAGAGATTCGATTCGGAACTCTTATATGTCCAAGGTCAATATGGAAATTCTTTCAGAGGTTTTCCCTTACTTTGTCCGTGTCAACAAACAATTCGAAATACCTCGACTTTTTCAGAACAGGTCCGAGTCAAATAGCAATGATTCGAAGCACTTCTTTTTCCATTACACTATTTCGGAAACCTAAGGACTCGATCGTATGGATATGGAAAATACAGGATTTCCGGTCCTAGCGGGAAAAGGAGGGAAACGGATACTCAATTTAAAGTGAGTAAACAGAATTCCATACTCGATCTCATAGATCCCTATAGAATTCTGTGGAAAGCCGTATTCGATGAAAGTCGTATGTACGGCTTGGAGGGAGATCTTTCCTATCTTTCGAGATCCACCCTACAATATGGGGCCAAAAAGCCAAAAAAATAAGTGATTCGTTTTTAGCCCTTATAAAAAGAAAACGGATTCTTGAACCTCTTTCACGCTCATGTCACGTCGAGGTACTGCAGAAAAAAGAACCGCAAAATCCGATCCAATTTTTCGTAATCGATTAGTTAACATGGTGGTTAACCGTATTATGAAAGACGGAAAAAAATCATTGGCTTATCAAATTCTCTATCGAGCCGTGAAAAAGATTCAACAAAAGACAGAAACAAATCCACTATTGGTTTTACGTCAAGCAATACGTAGAGTAACTCCCAATATAGGAGTAAAAACAAGACGTAATAAAAAAGGATCGACGCGGAAAGTTCCGATTGAAATAGGATCTAAACAAGGAAGAGCACTTGCCATTCGTTGGTTATTAGAAGCATCCCAAAAGCGTCCGGGTCGAAATATGGCTTTCAAATTAAGTTCCGAATTAGTAGATGCTGCCAAAGGGAGTGGGGGTGCCATACGCAAAAAGGAAGCGACTCATAGAATGGCAGAGGCAAATAGAGCTCTTGCACATTTTCGTTAATCCATGAACAGAATCTAGGTATGTAGACACATGGATCCATACATCTCGATCGGAAAAGAATCAATAGAAGGAGAATCGGACGATATCTTTTTCGAAACAAATAAAAAGGAAAAAAAAAGAGAAAACAGAAATCATGATCAACTAAGCCCTCTCGGGGGCTTGCTTAAGAATAAGAAAGAGGAATCTTATGGAAATAGCATGGAATAAGGTTTGATCCTATTCATGGGGATTCCGTAAATATCCCATTCCAAAAATCGAAACAATCGGGACTTTTCGGAGATTGGCTGCAGTTACTAATTCATGATCTGGCATGTACAGAATGAAAACTTCATTCTCGATTCTACGAGAATTTTTATGAAAGCGTTTCATTTGCTTCTCTTCAATGGAAGTTTCATTTTCCCAGAATGTATCCTAATTTTTGGCCTAATTCTTCTTCTGATGATCGATTTAACCTCTGATCAAAAAGATAGACCTTGGTTCTATTTCATCTCTTCAACAAGTTTAGTAATAAGCATAACGGCCCTATTGTTCCGATGGAGAGAAGAACCTATAATTAGCTTTTCGGGAAATTTCCAAACGAACAATTTCAACGAAATCTTTCAATTTCTTATTTTATTATGTTCAACTTTATGTATTCCTCTATCCGTAGAGTACATTGAATGTACAGAAATGGCTATAACAGAGTTTCTGTTATTCGTATTAACAGCTACTCTAGGGGGAATGTTTTTATGTGGTGCTAACGATTTAATAACTATCTTTGTAGCTCCAGAATGTTTCAGTTTATGTTCCTACCTATTGTCTGGATATACCAAGAGAGATCTACGGTCTAATGAGGCTACTATGAAATATTTACTCATGGGTGGGGCAAGCTCTTCTATTCTGGTTCATGGTTTCTCTTGGCTATATGGTTCATCTGGGGGGGAGATCGAGCTTCAAGAAATTGTGAATGGTCTTATCAATACACAAATGTATAACTCCCCAGGAATTTCAATTGCGCTTATATTCATCACTGTAGGACTTGGGTTCAAGCTTTCCCCAGCCCCTTTTCATCAATGGACTCCTGACGTCTACGAAGGAGTGTGGTTCGTTCGACAAATTCCTACCTCTATCTGAGGTGTTTGGGTTTTGCAAAACTCCATAGACATGCAGAAGAGAAATGCTATCCCCACTCCGACCAAGACAGAACTTTTACCAAAAGTTTATGTGATCTTTTTGTTCAAATAACAATTAAGGTGAAGCAGGGTCAGGAACAACGAATCTCTTTATGATAAACAGATCCATTTTGCAAGCTCGTTATTACGGGTAGTTCCTACAAAGAATCGGACTAATGACGTATACAATGCTTGAATTATCGATGTAAATGCTACATAGTGGGTTCTCATCCTTCAGAGACTACGAGTGTAATAGGAGCATCCGTTGACAAAAGGATCACCCTAAGATGATCATCTCATGGCTATTGGGAACGAATCAAATCAGATGGTTCTATTTCTCAACCTTTCTGACTTGCTCCTACGGAACCAAGGTCGAAAGGATTGAAAAAGTCAGTCATTCACAACCACTGATGAAGGATTCCTCGAAAAGTTAAGGATTAGTAGTTCTTTTTCGAAATCCATTTCGAAAAAGAATGGATTCGGTCTTATACATACGCGAGGAAGGTAATCAAAAAAGAAAGAAGACGAGTTCTTCTTTCTTTTATCACTTAGGAGCCGTGCGAGATGAAAGTCTCATGCACGGTTTTGCATGAGAGAAAGAAGCGAGGAATCCTCTTTTCGACTCTGACTCCCCCACTCCAGTCGTTGCTTTTCTTTCTGTTACTTCGAAAGTAGCTGCTTCAGCTTTAGCCACGCGAATTCTCGATATTCCTTTTTATTTCTCATCAAACGAATGGCATCTTCTTCTGGAAATCCTAGCTATTCTTAGCATGATATTGGGGAATCTCCTTGCTATTACTCAAACAAGCATGAAACGTATGCTTGCATATTCGTCCATAGGGCAAATCGGATATGTAATTATTGGAATAATTGTTGGAGACTCAAATGATGGATATGCAAGCATGATAACTTATATGCTGTTCTATATCTCCATGAATCTAGGAACTTTTGCTTGCATTGTATTATTTGGTCTACGTACCGGAACTGATAACATTCGAGATTATGCAGGATTATACACGAAAGATCCTTTTTTGGCTCTCTCTTTAGCCCTATGTCTCTTATCCCTAGGAGGCCTTCCTCCACTAGCAGGTTTCTTCGGAAAACTCTATCTATTCTGGTGTGGATGGCAAGCAGGCCTATATTTCTTGGTTTCAATAGGACTCCTTACGAGCGTTCTTTCTATCTACTATTATCTAAAAATAATCAAGTTATTAATGACTGGACGAAACCAAGAAATAACCCCTTATGTGCGAAATTATAGAAGATCCCCTTTAAGATCAAACAATTCCATCGAATTGAGTATGACTGTATGTGTGATAGCATCTACTATACCAGGAATATCAATGAACCCCATTCTTGCAATTGCTCAGGATACCCTCTTTTAGCTGCTAGGTCTATTTCTTAGTTCAAGATCCCTCTTACTAACTGGAATAAAAGAATTAGTAGATCTGTTCCGCCCAAAATGGGAATGGGTGCTAGGGTTATGAACTTATAATCATGGAATCGACTCGATCATCAGATTATAAGTTCATTCCATACCGGACCAGATCGTGCACATTCTTATTATGAGAAGGGGTCATTCGAGCCTATGGAAATAGGATACTCTGTTTACATAGAAATCCCTACGTCCTTACATTCTATTTAGGATTAGGAATAGGTGTAATCAGACCTGCTTTTGACATATCTATCCTATCCTTATTTGGGTACCATATGCACCTCTTTGGGCTTCTATTGAATCGAGAAATTGGATTGTACATCTTTTTGATTTTGATATCGATTTTGATACATATAAGGTGTCCTACGGATAATGCAAATCGAAGCTATTTGATGTCTGACTCAGGCCTATATGTATATGACCGATCGATCGAAATACTCCAAGACTCCACCTTTGTCATATATTCCATATATCACATTCGATAGATATCATATTCATGGAATACGATTCACTTTCAAGATGCCTTGATGGTGAAATGGTAGACACGCGAGACTCAAAATCTCGTGCTAAAGAGCGTGGAGGTTCGAGTCCTCTTCAAGGCATAATACGGAGAATGCTCATTGAATGAGCATTCCCCGTAGAAGTATTCCGGAAATCTGCGCCTGGCGCTCTCCTCTATCTTCTGAGGTCCTTAACCATCTCCCTGAGAAAAGTAGACAGTAAAAGCCAAAATAGACTAAATATAGCCTGAATGATCCTAAAAACCCCTCGAAGGAGATAATAAAGAACCTAAAGCAGACGGTATCCTACTGCAAGGGTGGTCTTAAGAATCCAAAAGAGGTTGCTCAGAAGAGATAGATGTATCCCAACCTCTATTGCTCTCGCGTAAAGCCTTTTTTTTACGCGACAGGAAAAAGTGACTACGAATTCCCCTTTTTGTTTGCGAATCCCTGTTTGTATCCTTTGAGCGCACGCCCATAAGTAGCGATCAAGGAAATCGATCAAACGATCCCAATACCGTGAAAGAGAAACTTCCCAGATCCAGGGAAGCTTATCATAAAGGGCTTCAACAAGGGGTTTTATTCGTTCTTTGAGCAAAAAGATAAAGATCGGATAGATTCGAACCGCAATTGCAAAGGTAATAACTACTATGCCAGCCCAAATCATGATCTTCACCAACTTGGATTTGGTTCTCTCGCGAAAATCGCGAGTTGCAGAGATGAGAACCATGAAAAGCAAGATCCCGAATAAGAAAATAGAAACCGAGGAAACCACAAGAGTGAAGACTAGTAGAGTCTCATCTTTTGTCATTCTTTGCTCCTTTTTCACTCAATGATTCATTCGAATTTCCCAACCAAAAATTCTATATGTCTATTCTATGATATTTCTATATATATAGAATATGATATCTAATATGACACCCGATTTGTCAAAGGGATTGGATTGGTGACTTACCCATTCAGTGACTTTGGCACTGGACGTTCCAAAAACGGGTACTATCGGATCGGGTGAATTAGAGAATAGACAGAGGTCCGTTGGCATTTCAGCTTCTCTTCTCCTTTCAGGGCCTATCCGAAAGAGAATCCAGGACCTCTTGGTCCTGAATATCAGAATAGGACGAACGAACCGGCCTCCGCGGATATCTTTGCTTCGGAACAAAACAATTAGCATTAGGCTCGGTCAACTGGAATGTGTATTATCCATATGGGAGATCTTCCAATCGAGAAGATCCATCGATCTGAGACGAAGAGAAAGGGCCCATTTTCTTTACTTATTCAGTTAAACCAAGGATTCGTTATGGAAACAGATAGCAACAACCATTTCATCAGACATGCGTATTTTTGATTATCCGGTGGATTTACACAGTTTCATTAATGCAAATTGTTTGATGTAGTTAGTACTCAGGTTATTCGACGCTCAAGAATTCTTATTTAGGCAGTTCATATCATCCCATACATAGTGTTTTGATCTAAGATTGCAATTCTTCCATGTTTCCGCAGTAGCATATTGTTCCATGGAGCTAGGGTCCAAAATAGGAATCAACAAGTGTTTCCACGACTCTACCGCCCGGCCAATCCTGTTCCACTGAATCCCCTCCCTTTTTCATGGCCACATATCTTTACGGCTAAGGAGTGGGAAATCTTTCTCCTGTTACACAAATGAAATGTTTCATTTCATCCGGGAAAAGCCACCTCTTTCTCCACAAACAATGTCTTTGTCATTTGATCCAGGAGCCTTCCGTTAGATAGGAACAGCTTTGCTAAATACTGAGAACTCTCGGATAGAGTATTAGAATGAAAAGACCATTAATTATATAAGGAAGAACCCAGGGTTCTAGCCCATTCCCATTCCTAAATCACTAATTCGTAGTGCTTTTGCCTTTCTTGCGTACTCCTGGTGAACCAGTTGCTAGCCATATGTTTAGGAGGCTTTTTTCTCCAGGTACTGGTACTAAGCCGCTTTGCCATCTCTTCATCTTCATCTGCAAAGAATTCTCGACGTGAAAACACAGAGACAAAGGCCTGATCTTTGAATAGGAAAAAGAATGGATCCGAAGGTCCCAAATCAATTGGCTTATTCGAAAAAAGCCTTCTTCTTTGAAAGATATATCTCGTGTCTGGTACTGCATTGTTCCACTCTGCAAGAAGTCCGAATCAGTCTCTTGCACCTCCCCCTTTTTATGATAAATATACCAGAAATAATTCGAATAAATAGCAGTCTCTGACAACTCATCCTCTTTAATCTGCTTGGACCCGCTCCAATACCCATAGGAAAATCCCCAGTCATATTCAGCGTACCTGTCCCTGCAATCAAATAGATTGTCCCAAGGGCCCCATATTCTAGGAGCCCAAGTTATGCTATTGAAAATTCGTTCCTCTAGCAGTTCCGGTTTGACCATTCCGTTCCCTTTTTCAAACTCCACTTCTTTTCATATAGCATCCCTAATCAAAGAGAGAACAATATCCATTTCAAAACATTTCTAACGGATTCCTTGGTTCGGACCGACGAAGTAATGGCACTCGATTATTATCAACCCGACTGCAATCTTTTTCTGTCGGTAAGGATTGCACCAGAGCACCTTCTACTTCTAATAGGCCATGAACTATAGATAGAGAAGAATCATTCTGAGCGAGTCCATAAGAAGCGACCCACTTTTTCATCGGTTCCGGGGGAAGACCAAAGATCTTGCGCGACCGGTCCGCCAGAAAAACTCAAAAGAGAAAGAAGTCTCGTTAATCTCTTCATGCTCGTTCCAAGTTCGACGTTTGGCCAAAGAAAAAGCCGCTTCCTGACACGATTGCCTCTTTATATAGATAGATATAGGATCTATGGGGTTATTACTTAGAAGTAGAAGTCTATTTTGTACAAGATCCCCTCCTATCTGATAGAAAAGGGTCCCATGATCCCGAGCCGGTCTTATCTTGGCTCGCAAACCCCAAGTTTGTCTATGAAGAGCTAATCTAATTGTATTAGTTTCTATAATGGATTTCTTATGTGGAATACTAATGGATAGGGCCTCGTTGCTAAGTGCTACAAGATCTAGTGCACTGGAACTCGTGGTTATGGACCCGAATCCTTTAGTATGGAACATTGTCTTTTCCAAGTAAAAACCCCTAGTATATGAAAGAATGAAAAGGTGCTTTCGTTCTTGTGGAATAAGAAGCCCTCGTACCTTAATGAAAGGAAAATAGGAATTTTTCGTTAGGTATTTGACCAAATAGGATCGTCCAGTTCCTATAGAACCTATCACTAAAATACCCGATAGGGCTAAGCGGAACGAAAAGGGTTTTCCATGAGATGGTAAATGAAAACGATTAGCCCCACACGAGGTTTGGGAATAAGTGATTGTCTGATAATGAGCAAGGAATATACGTCTTTCTGCTAAAGAGGATCTATTAAACTCATAATTCATTAGATCCTTGTTAGCAATGTCAACTAGGTATCATAAGTAAATGGATCTCGGTTGTTCAATCCTTTGATAACCAAGGTCATTCTTTGCTAAAGAGAAATGATCACTATGGGTCAGACTCAATAGAATTGGATCCATTCCAAATAGCGAGAATTAGGATTCTTGATCCCTCTCAATCTCTCTTTCAATTCGAGGATCCGGAGAGGTTTTTTCATAGTCATCTCCGAATATTTGCCATCTCCGAATATTTTCGATTTCATTTTTCTATGATATGTCTTTCTATATGAAAATTGGTTATTTACGATGTACGATGATCCCTGTTAAGCATCCATGGCTGAATGGTTAAAGCGCCCAACTCATAATTGGTAAATTTGCGGGTTCAATTCCTGCTGGATGCACGCGAACGGGAACGGTCTATTGGAACTGGCTCTCTATCCATGGAATCTCATCCATCATCCATACATAACGAATTGGTATGGTATATTCATACCATAACATAAGAACAATAAGAACTCGAATTCTTATCGATACTGGAACTCAGAGCATAGGAGGGAAAGTCGATTTATGGATGGAATCAAATACGCAGTATTTACAGAAAAGAGTCTTCGTTTATTGGGAAAGAATCAATATACTTTTAATGTCGAATCGGGATTCACTAAGACAGAAATAAAGCATTGGGTCGAACTCTTCTTTGGTGTTAAGGTAGTAGCTGTGAATAGCCATCGACTACCCGGAAAGGGTAGAAGAATGGGACCTATTCTGGGACATACAATGCATTACAGACGTATGATCATTACCCTTCAACCGGGTTATTCTATTCCACTTCTAGATAGAGAAACGAACTAAAGGAGAATACTTAATAATACGGCGAAACATTTATACAAAACACCTATCCCGAGCACACGCAAGGGAACCGTAGACAGGCAAGTGAAATCCAATCCACGAAATAAATTGATCCATGGACGGCACCGTTGTGGTAAAGGTCGTAATGCCAGAGGAATCATTACCGCAAGGCATAGAGGGGGAGGTCATAAGCGCCTATACCGTAAAATCGATTTTCGACGGAATCAAAAAGACATATCTGGTAGAATCGTAACCATAGAATACGACCCTAATCGAAATGCATACATTTGTCTCATACACTATGGGGATGGTGAGAAGAGATATATTTTACATCCCAGAGGGGCTATAATTGGAGATACTATTGTTTCTGGTACAAAAGTTCCTATATCAATGGGAAATGCCCTACCTTTGAGTGCGGTTTGAACTATTGATTTACGTAATTGGAAGTAACCAATTAGGTTTACGACGAAACCTAGAAATCGATCACTGATCCAATTTGACTACCTCTACGGGATAGACCTCAACAGAAAACTGTTGAGTAACGGCAGCAAGTGATTGAGTTCAGTAGTTCCTCATAGAAAATTATTGACTCTAGAGATATGGTAATATGGAGAAGACAAAATTGTTTGAAGCACGCACAGAACCGGAAGCGCCCCTTGTTTCAAAGAGAGGAGGACGGGTTATTCACATTTAATTTGATGGTCAGAGGCGAATTGAAAGCTAAGCAGTGGTAATTAAGACCCCCGGGTGAAAATAGGGATGTCTCCTACGTTACCCATAATATGTGGAAGTATCGACGTAATTTCATAGAGTCATTCGATCTGAATGCTACATGAAGAACATAAGCCAGATGACGGAACGCGGAGACCTAGGATGTAGAAGATCATAACATGAGCGATTCGGCGGATTTGGATTCCTTTTCTATATATCCACTCATGTGGTACTTCATCATACGATTCATATAAGATCCATCTGTCTAGAGATCGTCATATACATCTAGAAAGCCGTATGCTTTGGAAGAAGCTTGTACAGTTTGGGAAGGGGTTTTTTGATAAAAAAGAAGAATCTACTTCAACCGATATGCCCTTAGGCACGGCCATACATAACATAGAAATCACACGTGGAAGGGGTGGGCAATTAGCTAGAGCAGCAGGTGCTGTAGCGAAACTGATTGCAAAAGAGGGTAAATTGGCCACTTTAAGATTACCATCTGGGGAGGTCCGTTTGGTATCCCAAAACTGCTTAGCAACAGTCGGACAAGTGGGTAATGTTGGGGTGAACCAAAAAAGTTTGGGTAGAGCCGGATCTAAGTGTTGGCTAGGTAAACGCCCCGTAGTAAGAGGGGTAGTTATGAACCCTGTGGACCACCCCCATGGGGGTGGTGAAGGGAAAGCCCCCATTGGTAGAAAAAAACCCACAACCCCTTGGGGTTATCCTGCGCTTGGAAGAAGAACTAGGAAAAGGAAAAAATATAGTGATAGTTTTATTCTTCGTCGCCGTAAGTAAATACGTAACTAGGAATATGGAAAATTGCATTTTTGGAAATTGCAATAATGCGATGGGCGAACGACGGGAATTGAACCCGCGCATGGTGGATTCACAATCCACTGCCTTGATCCACTTGGCTACATCCGCCCCTTATCCAGCTAAAGGATTTTCTCTTTTTTCCATTCATTATTATTCTATTTATTCTGACCTCCATACCTCGATCGAGATAGTGGACATAGGATGCCACTCTTTAAAATGAAAAAAAGGAGTAATCAGCTGTGACACGAAAAAAAACGAATCCTTTTGTAGCTCGTCATTTATTGGCAAAAATCGAAAAGGTCAATATGAAGGAGGAGAAAGAAATAATAGTAACGTGGTCCCGGGCATCTAGCATTCTACCCGCAATGGTTGGCCATACAATCGCGATTCATAATGGAAAAGAACATATACCTATTTACATAACAAATCCTATGGTAGGTCGCAAATTGGGGGAATTCGTGCCTACTCGGCATTTCACGAGTTATGAAAGTACAAGAAAGGATACTAAATCTCGTCGTTAATTGAATTCAGAATAGAAAGATTCAGAATAAACAAA
